# Supplementary material for: Antiseizure medication use during pregnancy and children’s neurodevelopmental outcomes
Source: Springer Nature journal article supplement (doi:10.1038/s41467-024-53813-1), 2024-11-15
Supplement: MOESM1 [file 41467_2024_53813_MOESM1_ESM.pdf]

# Supplementary Material

Antiseizure Medication Use During Pregnancy and Children's Neurodevelopmental Outcomes

## Contents

|                                                                                                |    |
|------------------------------------------------------------------------------------------------|----|
| <b>Supplementary Background</b>                                                                | 3  |
| Synthesis of recent large-scale studies of children's neurodevelopmental outcomes              | 3  |
| Carbamazepine consistency across studies                                                       | 3  |
| <b>Supplementary Methods</b>                                                                   | 6  |
| STROBE Statement—checklist                                                                     | 6  |
| Data sources                                                                                   | 10 |
| CPRD GOLD (UK)                                                                                 | 10 |
| DOHaD (Sweden)                                                                                 | 11 |
| Uncertain pregnancies in the CPRD pregnancy register                                           | 13 |
| Exposure: maternal antiseizure medication                                                      | 14 |
| Prescription data cleaning procedure – CPRD (UK)                                               | 14 |
| Definition of “other ASMs”                                                                     | 15 |
| Outcome: offspring neurodevelopmental conditions                                               | 16 |
| Eligibility for linkage to Hospital Episode Statistics data – CPRD (UK)                        | 16 |
| Covariates                                                                                     | 17 |
| Antiseizure medication (ASM) indication definitions                                            | 17 |
| Other covariate definitions                                                                    | 19 |
| Missing data                                                                                   | 22 |
| CPRD GOLD (UK)                                                                                 | 22 |
| DOHaD (Sweden)                                                                                 | 22 |
| Statistical analysis                                                                           | 22 |
| Follow-up time                                                                                 | 22 |
| <b>Supplementary Results</b>                                                                   | 23 |
| Supplementary Tables                                                                           | 23 |
| <b>Table S1</b> – Country and ASM specific exposure counts and follow up time                  | 23 |
| <b>Table S2</b> – <b>Primary Analysis:</b> Country specific adjusted marginal risk results     | 24 |
| <b>Table S3</b> – <b>Primary Analysis:</b> Pooled adjusted marginal risk results               | 25 |
| <b>Table S4</b> – <b>Primary Analysis:</b> Country specific risk difference results            | 26 |
| <b>Table S5</b> – <b>Primary Analysis:</b> Pooled risk difference (relative to no ASM) results | 27 |
| <b>Table S6</b> – <b>Primary Analysis:</b> Country specific and combined hazard ratio results  | 28 |
| <b>Table S7</b> – <b>Heterogeneity Tests:</b> Wald tests of hazard ratio comparisons           | 29 |

|                                                                                                                                                     |           |
|-----------------------------------------------------------------------------------------------------------------------------------------------------|-----------|
| <b>Table S8 – Discordant Sibling Analysis:</b> Country specific and combined results .....                                                          | 31        |
| <b>Table S9 – Active Comparator Analysis:</b> Country specific and combined results.....                                                            | 32        |
| <b>Table S10 – Indication Stratified Analysis:</b> Counts of exposed and exposed with each outcome in each country according to indication .....    | 33        |
| <b>Table S11 – Indication Stratified Analysis:</b> Country specific adjusted marginal risk results.....                                             | 35        |
| <b>Table S12 – Indication Stratified Analysis:</b> Pooled adjusted marginal risk at age 12 results.....                                             | 36        |
| <b>Table S13 – Sensitivity Analysis:</b> Pooled hazard ratio results .....                                                                          | 37        |
| <b>Table S14 – Sensitivity Analysis:</b> Comparison of primary analysis models including and excluding vomiting or antiemetics as a covariate ..... | 38        |
| <b>Table S15 – Counts of antiseizure medications included in the polytherapy category .....</b>                                                     | <b>39</b> |
| Supplementary Figures.....                                                                                                                          | 40        |
| <b>Figure S1 – Flowchart of cohort derivation for CPRD (UK) .....</b>                                                                               | <b>40</b> |
| <b>Figure S2 – Flowchart of cohort derivation for DOHaD (Sweden) .....</b>                                                                          | <b>41</b> |
| <b>Figure S3 – Primary Analysis:</b> Pooled risk difference results relative to no ASM at age 12 .....                                              | <b>42</b> |
| <b>Figure S4 – Primary Analysis:</b> Country specific risk difference results for autism relative to no ASM .....                                   | <b>43</b> |
| <b>Figure S5 – Primary Analysis:</b> Country specific risk difference results for intellectual disability relative to no ASM.....                   | <b>44</b> |
| <b>Figure S6 – Primary Analysis:</b> Country specific risk difference results for ADHD relative to no ASM .....                                     | <b>45</b> |
| <b>Figure S7 – Primary Analysis:</b> Country specific hazard ratio results.....                                                                     | <b>46</b> |
| <b>Figure S8 – Discordant Sibling Analysis:</b> Country specific within-family hazard ratio results.....                                            | <b>47</b> |
| <b>Figure S9 – Active Comparator Analysis:</b> Country specific hazard ratio results .....                                                          | <b>48</b> |
| <b>Figure S10 – Indication Stratified Analysis:</b> Pooled adjusted marginal risk at age 12 results .....                                           | <b>49</b> |
| <b>Figure S11 – Indication Stratified Analysis:</b> Pooled hazard ratio results .....                                                               | <b>50</b> |
| <b>Figure S12 – Indication Stratified Analysis:</b> Country specific hazard ratio results for epilepsy...                                           | <b>51</b> |
| <b>Figure S13 – Indication Stratified Analysis:</b> Country specific hazard ratio results for psychiatric indications .....                         | <b>52</b> |
| <b>Figure S14 – Indication Stratified Analysis:</b> Country specific hazard ratio results for somatic indications .....                             | <b>53</b> |
| References.....                                                                                                                                     | 54        |

## Supplementary Background

### Synthesis of recent large-scale studies of children's neurodevelopmental outcomes

There have been a series of large-scale recent efforts dedicated to studying specific ASMs in pregnancy and children's neurodevelopmental/cognitive outcomes (see Supplementary Background Table 1), several of which have relied on routinely collected data. Each of the studies has specific strengths and weaknesses, with small or larger differences in approaches. These differences include variations in exposure (e.g., dispensations or self-report) and outcome definitions (e.g., clinical diagnosis or standardized tests), populations (e.g., total population or mothers with epilepsy), and analytical approaches (e.g., time-to-event or contrasts in expected distributions). For studies on clinically diagnosed neurodevelopmental outcomes, the number of children with neurodevelopmental conditions exposed to specific ASMs typically remains limited to tens, despite utilizing extensive electronic health records, insurance claims, or nationwide registries.

### Carbamazepine consistency across studies

Since we found an increased risk associated with carbamazepine, which has not been widely reported before, we conducted a rapid synthesis of estimates from previous studies to assess if our estimate deviated from literature expectations. The populations in these studies, including ours, overlap, and therefore, one should not interpret a pooled meta-analyzed estimate across studies. However, to illustrate the quantitative consistency across studies, we performed a fixed-effects meta-analysis. We find that the estimates are consistent across studies for autism and ADHD ( $I^2 = 0\%$ ) (see Supplementary Background Figure 1). For intellectual disability, there is some variation ( $I^2 = 75.4\%$ ), which appears to be explained by the large effect found in Denmark by Daugaard et al.<sup>1</sup>. However, our findings are consistent with those of Bjørk et al.<sup>2</sup> and Dreier et al.<sup>3</sup>, although ours is statistically significant due to the larger number of exposed cases. Finally, we note that Ren et al.<sup>4</sup> found that children exposed to carbamazepine in pregnancy performed worse on standardized school tests at grade 9.

Supplementary Background Table 1 – Recently published studies of antiseizure medications in pregnancy and offspring neurodevelopmental conditions or related outcomes

| Author(s)<br>(year)                       | Country                                     | Study design                           | Exposure(s)                                                                | Outcome(s)                                                                              | Sample size     | Finding(s)                                                                                                                                  | Strength(s)                                                           | Limitation(s)                                                                                          |
|-------------------------------------------|---------------------------------------------|----------------------------------------|----------------------------------------------------------------------------|-----------------------------------------------------------------------------------------|-----------------|---------------------------------------------------------------------------------------------------------------------------------------------|-----------------------------------------------------------------------|--------------------------------------------------------------------------------------------------------|
| Hernández-Díaz et al.<br>(2024)           | United States                               | Insurance claims                       | Topiramate, valproate or lamotrigine in second half of pregnancy           | Autism                                                                                  | 4 292 539       | Valproate associated with autism, but not topiramate and lamotrigine                                                                        | Large sample size, detailed sensitivity analysis                      | Only studies autism and has large loss to follow-up (resulting in a median of 2 years of follow-up)    |
| Cohen et al.<br>(2023)                    | United States                               | Clinical cohort                        | Third trimester antiseizure medication blood concentration                 | Adaptive behavior outcomes, and score-defined autism, ADHD, and intellectual disability | 386             | No difference between exposed and control patients, but higher blood concentration was associated with poorer adaptive behavior             | Objective measure of exposure, detailed data on each participant      | Small sample size, unable to study clinical outcomes, only stratified on lamotrigine and levetiracetam |
| Knight et al.<br>(2023)                   | United Kingdom                              | Phone interviews with topiramate users | Topiramate                                                                 | Adaptive behavior outcomes and autism                                                   | 21 <sup>a</sup> | Topiramate was associated with poorer adaptive behavior and autism                                                                          | Detailed patient contact                                              | Retrospective and no "control-group" (compared to expected distributions)                              |
| Daugaard et al.<br>(2020)                 | Denmark                                     | Registry-based                         | Several antiseizure medications                                            | Intellectual Disability and "Delayed Childhood Milestones"                              | 913 302         | Valproate, carbamazepine, and oxcarbazepine were associated with increased risk of intellectual disability and delayed childhood milestones | Examines a broad range of antiseizure medications, general population | Few exposed cases                                                                                      |
| Bjørk, et al.<br>(2022)                   | Denmark, Finland, Iceland, Norway, & Sweden | Registry-based                         | Several antiseizure medications                                            | Autism and intellectual disability                                                      | 4 702 774       | Topiramate, valproate, and several duo therapies were associated with increased risks of neurodevelopmental disorders                       | Examines a broad range of antiseizure medications, general population | Few exposed cases, and no reported adjustment for epilepsy as an indication                            |
| Dreier et al.<br>(2023)                   | Denmark, Finland, Iceland, Norway, & Sweden | Registry-based of women with epilepsy  | Several antiseizure medications                                            | Childhood- and Adolescence-Onset Psychiatric Disorders                                  | 38 661          | Topiramate and levetiracetam were associated with ADHD                                                                                      | Examines a broad range of antiseizure medications                     | Restricted to women with epilepsy                                                                      |
| Ren et al.<br>(2023)                      | Denmark                                     | Registry-based                         | Carbamazepine                                                              | Academic performance (ninth-grade exit examination)                                     | 370 859         | Carbamazepine was associated with poorer academic performance                                                                               | Does not rely on 'diagnostic' detection                               | Unclear clinical relevance of the outcome                                                              |
| Wiggs et al.<br>(2020)                    | Sweden                                      | Registry-based of women with epilepsy  | "Any antiseizure medication" and valproate, lamotrigine, and carbamazepine | Autism and ADHD                                                                         | 14 614          | Valproate was associated with autism and ADHD. Carbamazepine was not statistically significant (albeit elevated risk)                       | Use of older exposure data to increase the effective sample size      | Restricted to women with epilepsy                                                                      |
| <sup>a</sup> Topiramate exposed children. |                                             |                                        |                                                                            |                                                                                         |                 |                                                                                                                                             |                                                                       |                                                                                                        |

Supplementary Background Figure 1 – Fixed-effects meta-analysis of carbamazepine estimates from recently published studies. The effect measure is the fully adjusted relative risk (mostly hazard ratio) in the respective study, with 95% confidence intervals.

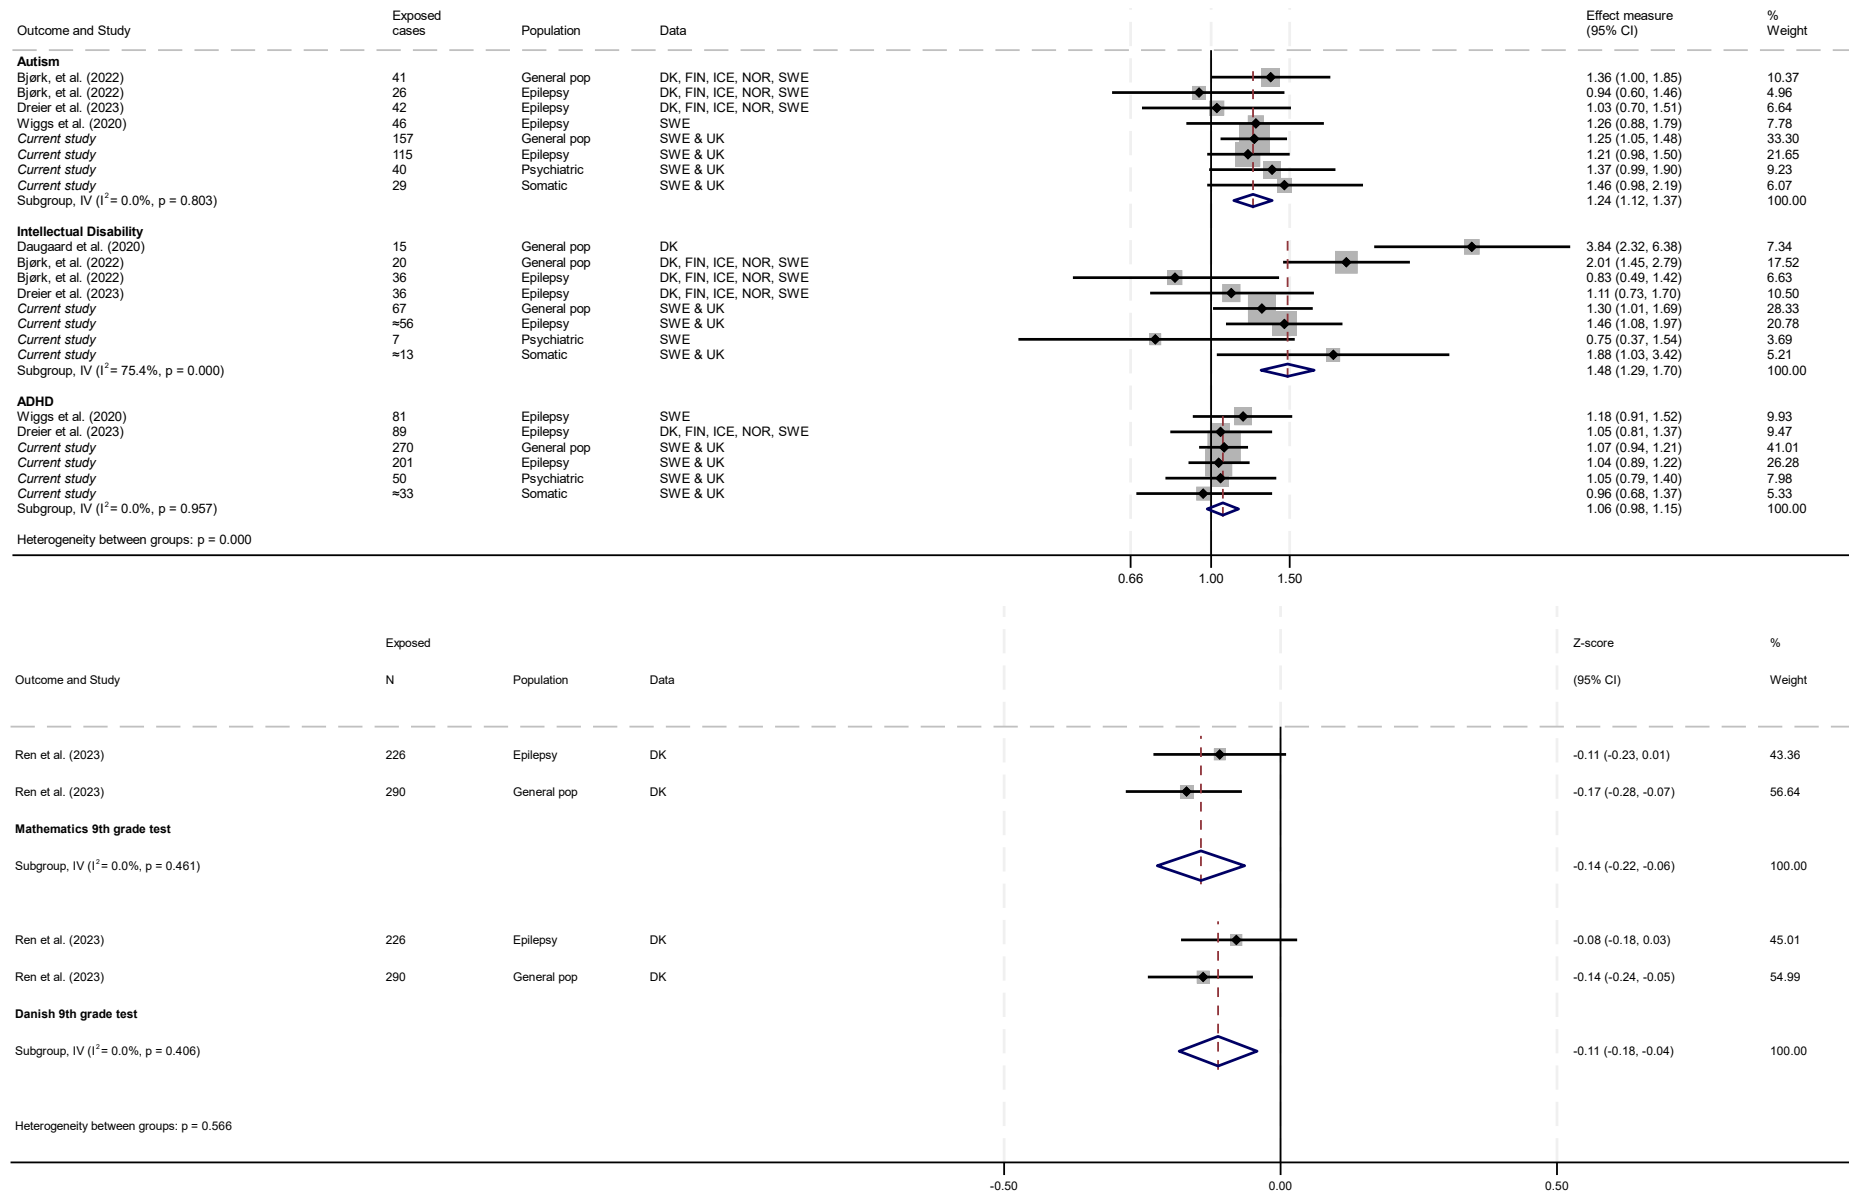

## Supplementary Methods

### STROBE Statement—checklist

|                           | Item No. | Recommendation                                                                                                                                  | Relevant section from manuscript                                                                                                                    |
|---------------------------|----------|-------------------------------------------------------------------------------------------------------------------------------------------------|-----------------------------------------------------------------------------------------------------------------------------------------------------|
| <b>Title and abstract</b> | 1        | (a) Indicate the study's design with a commonly used term in the title or the abstract                                                          | Title                                                                                                                                               |
|                           |          | (b) Provide in the abstract an informative and balanced summary of what was done and what was found                                             | Abstract                                                                                                                                            |
| <b>Introduction</b>       |          |                                                                                                                                                 |                                                                                                                                                     |
| Background/rationale      | 2        | Explain the scientific background and rationale for the investigation being reported                                                            | Introduction (paragraph 1-4)                                                                                                                        |
| Objectives                | 3        | State specific objectives, including any prespecified hypotheses                                                                                | Introduction (paragraph 5)                                                                                                                          |
| <b>Methods</b>            |          |                                                                                                                                                 |                                                                                                                                                     |
| Study design              | 4        | Present key elements of study design early in the paper                                                                                         | Methods (paragraph 1)                                                                                                                               |
| Setting                   | 5        | Describe the setting, locations, and relevant dates, including periods of recruitment, exposure, follow-up, and data collection                 | Methods (Data sources)                                                                                                                              |
| Participants              | 6        | (a) <i>Cohort study</i> —Give the eligibility criteria, and the sources and methods of selection of participants. Describe methods of follow-up | Methods (Study population)                                                                                                                          |
|                           |          | (b) <i>Cohort study</i> —For matched studies, give matching criteria and number of exposed and unexposed                                        | NA                                                                                                                                                  |
| Variables                 | 7        | Clearly define all outcomes, exposures, predictors, potential confounders, and effect modifiers. Give diagnostic criteria, if applicable        | Methods (Exposure: Maternal antiepileptic medication section; Outcome: Children's neurodevelopmental conditions; Covariates); Supplementary Methods |

|                              | Item No. | Recommendation                                                                                                                                                                       | Relevant section from manuscript                                                                                                                                                |
|------------------------------|----------|--------------------------------------------------------------------------------------------------------------------------------------------------------------------------------------|---------------------------------------------------------------------------------------------------------------------------------------------------------------------------------|
| Data sources/<br>measurement | 8*       | For each variable of interest, give sources of data and details of methods of assessment (measurement). Describe comparability of assessment methods if there is more than one group | Methods (Data sources section; Exposure: Maternal antiseizure medication section; Outcome: Children’s neurodevelopmental conditions; Covariates section); Supplementary Methods |
| Bias                         | 9        | Describe any efforts to address potential sources of bias                                                                                                                            | Methods (Primary analysis; Secondary analysis; Sensitivity analysis)                                                                                                            |
| Study size                   | 10       | Explain how the study size was arrived at                                                                                                                                            | Methods (Study Population); Supplementary Figure S1 & S2                                                                                                                        |
| Quantitative variables       | 11       | Explain how quantitative variables were handled in the analyses. If applicable, describe which groupings were chosen and why                                                         | Methods (Covariates); Supplementary Methods (Covariates)                                                                                                                        |
| Statistical methods          | 12       | (a) Describe all statistical methods, including those used to control for confounding                                                                                                | Methods (Primary analysis; Secondary analysis)                                                                                                                                  |
|                              |          | (b) Describe any methods used to examine subgroups and interactions                                                                                                                  | Methods (Primary analysis)                                                                                                                                                      |
|                              |          | (c) Explain how missing data were addressed                                                                                                                                          | Supplementary Methods (Missing data section)                                                                                                                                    |
|                              |          | (d) Cohort study—If applicable, explain how loss to follow-up was addressed                                                                                                          | Methods (Primary analysis); supplementary methods                                                                                                                               |
|                              |          | (e) Describe any sensitivity analyses                                                                                                                                                | Methods (Secondary analysis; Sensitivity analysis)                                                                                                                              |
| Results                      |          |                                                                                                                                                                                      |                                                                                                                                                                                 |

|                   | Item No. | Recommendation                                                                                                                                                                                               | Relevant section from manuscript                                                        |
|-------------------|----------|--------------------------------------------------------------------------------------------------------------------------------------------------------------------------------------------------------------|-----------------------------------------------------------------------------------------|
| Participants      | 13*      | (a) Report numbers of individuals at each stage of study—eg numbers potentially eligible, examined for eligibility, confirmed eligible, included in the study, completing follow-up, and analysed            | Methods (Study Population); Supplementary Figure S1 & S2                                |
|                   |          | (b) Give reasons for non-participation at each stage                                                                                                                                                         | Supplementary Figure S1 & S2                                                            |
|                   |          | (c) Consider use of a flow diagram                                                                                                                                                                           | Supplementary Figure S1 & S2                                                            |
| Descriptive data  | 14*      | (a) Give characteristics of study participants (eg demographic, clinical, social) and information on exposures and potential confounders                                                                     | Results-paragraph 1; Table 1                                                            |
|                   |          | (b) Indicate number of participants with missing data for each variable of interest                                                                                                                          | Supplementary Methods (Missing data section); Supplementary Figure S1 & S2              |
|                   |          | (c) <i>Cohort study</i> —Summarise follow-up time (eg, average and total amount)                                                                                                                             | Supplementary Table S1                                                                  |
| Outcome data      | 15*      | <i>Cohort study</i> —Report numbers of outcome events or summary measures over time                                                                                                                          | Results (Paragraph 1)                                                                   |
| Main results      | 16       | (a) Give unadjusted estimates and, if applicable, confounder-adjusted estimates and their precision (eg, 95% confidence interval). Make clear which confounders were adjusted for and why they were included | Results (Primary analyses: ASM use and ...); Supplementary Tables S2-5 and Figures S3-7 |
|                   |          | (b) Report category boundaries when continuous variables were categorized                                                                                                                                    | Table 1                                                                                 |
|                   |          | (c) If relevant, consider translating estimates of relative risk into absolute risk for a meaningful time period                                                                                             | Results (ASM use and ...); Figure 1                                                     |
| Other analyses    | 17       | Report other analyses done—eg analyses of subgroups and interactions, and sensitivity analyses                                                                                                               | Results (Sibling analyses ...); Figure 3                                                |
| <b>Discussion</b> |          |                                                                                                                                                                                                              |                                                                                         |
| Key results       | 18       | Summarise key results with reference to study objectives                                                                                                                                                     | Discussion (Paragraph 1)                                                                |



|                          | <b>Item No.</b> | <b>Recommendation</b>                                                                                                                                                      | <b>Relevant section from manuscript</b> |
|--------------------------|-----------------|----------------------------------------------------------------------------------------------------------------------------------------------------------------------------|-----------------------------------------|
| Limitations              | 19              | Discuss limitations of the study, taking into account sources of potential bias or imprecision.<br>Discuss both direction and magnitude of any potential bias              | Discussion (Strength and limitations)   |
| Interpretation           | 20              | Give a cautious overall interpretation of results considering objectives, limitations, multiplicity of analyses, results from similar studies, and other relevant evidence | Discussion                              |
| Generalisability         | 21              | Discuss the generalisability (external validity) of the study results                                                                                                      | Discussion (Strength and limitations)   |
| <b>Other information</b> |                 |                                                                                                                                                                            |                                         |
| Funding                  | 22              | Give the source of funding and the role of the funders for the present study and, if applicable, for the original study on which the present article is based              | Disclosures (Funding statement)         |

## Data sources

### CPRD GOLD (UK)

Over 98% of the UK population are registered with a general practitioner (GP) and the GP is the gatekeeper of healthcare in the UK.<sup>5</sup> CPRD GOLD collates routinely collected anonymised health records from GP practices agreeing to provide data; these practices have data from around 6.9% of the UK population (as of 2015, though coverage has since increased) and the patients are broadly representative of the United Kingdom population in terms of age and sex.<sup>5</sup> Continuous CPRD data are available for each patient since registration at the practice, including diagnoses (recorded using Read codes)<sup>6</sup>, prescriptions (recorded using British National Formulary codes), and basic demographic data. We used the CPRD GOLD August 2021 build for our analyses<sup>7</sup>

The CPRD Pregnancy Register lists all pregnancies identified in the CPRD for women aged 11–49 years, with pregnancy episodes identified using an algorithm.<sup>8</sup> Summarised details of the algorithm can be found in Figure 1 of the register profile published by Minassian et al. The register includes pregnancy outcome derived from Read codes and Entity types, and estimates of pregnancy timings (including start and end of pregnancy) from date information accompanying the Read codes and Entity types. Validation work, comparing the Pregnancy Register against linked electronic maternity records in HES, has indicated overall good agreement, suggesting most pregnancies are well captured in the register.<sup>8</sup> Pregnancies in the register were identified with 91% sensitivity as compared to a gold standard of hospital deliveries recorded in HES and 95% of delivery dates in the register were within 2 days or dates in HES. We used the July 2020 build of the CPRD GOLD Pregnancy Register.

The CPRD Mother-Baby link allows for linkage between individuals within the same family as a result of a practice specific family identifier<sup>9</sup>. This linkage allowed us to identify prescriptions/covariates in the mothers and diagnoses of neurodevelopmental outcomes in the live-born child. We used the August 2021 build of the Mother-Baby link for this study.

We supplemented the primary care data of CPRD GOLD with the linked Hospital Episode Statistics (HES) database. HES data covers admitted patient/inpatient care (from 1997), outpatient and emergency care data (from 2003) for approximately 80% of the English practices included in CPRD. HES data contains diagnoses (coded using international classification of diseases, 10th revision) but not hospital-based prescriptions.<sup>5</sup> The data build used for linked HES data was set 21<sup>10-12</sup>.

We used linked Index of Multiple Deprivation (IMD) data, which is patient<sup>13</sup> or practice<sup>14</sup> level deprivation data. IMD score is calculated by mapping patients' or practice postcode to geographical areas with predefined deprivation scores; data from several indicators, chosen to cover a range of economic, social, and housing issues, are combined into a single deprivation score.<sup>5</sup> Patient level IMD

was available for most practices in England (corresponding to 77% of patients in England) and practice level IMD was available for all practices in Northern Ireland, Scotland and Wales. Patient level IMD was used where available and practice level IMD was used otherwise – 53% of patients had patient level IMD data available. The IMD score is only provided at a single time point by CPRD for each country: 2015 for England, 2017 for Northern Ireland, 2016 for Scotland and 2014 for Wales. Due to changes in the sociodemographic make up of areas over time, the IMD score may not accurately reflect deprivation in the mother's area of residence at the time of pregnancy, with less accuracy the further the pregnancy was from the time of IMD recording.

Information on patient date of death was obtained from the Office for National Statistics (ONS) death certificate data<sup>15</sup>.

#### DOHaD (Sweden)

The Swedish Developmental Origins of Health and Disease (DOHaD) study is a large-scale project that integrates multiple Swedish registries to advance research on pregnancy-related issues, with a particular emphasis on drug safety during pregnancy<sup>16</sup>. Utilizing the Swedish personal identification numbers<sup>17</sup>—assigned to every resident at birth or upon emigration—the study directly links data across Swedish registries with the help of Swedish registry authorities/holders. While the DOHaD study itself does not necessitate independent validation, its findings are inherently dependent on the accuracy and reliability of the underlying registries, which are detailed further below.

Swedish antenatal and obstetric care is publicly funded; almost all pregnant women attend antenatal care regularly and give birth in a hospital. The Swedish Medical Birth Register covers virtually all children born in Sweden (97% to >99% for every year between 1973 and 2020)<sup>18</sup>. While it is technically possible to report planned or unplanned home deliveries, these likely account for the small amount of missing data in the registry<sup>18</sup>. We included all identifiable pregnancies between July 1, 1995, and December 31, 2020.

Along with antenatal, obstetric, and neonatal data, the Swedish Medical Birth Register also contains antenatal records of medication use<sup>18</sup>. Early drug exposure information was prospectively collected during the first antenatal visit (typically occurring at 8-10 weeks of gestation), where midwives conducted structured interviews and examinations, recording prescription and over-the-counter medications<sup>18</sup>. Additional medication use throughout pregnancy is documented by midwives and doctors within antenatal records. These data are later translated into Anatomical Therapeutic Chemical (ATC) codes by the National Board of Health and Welfare. We obtained this data for all pregnancies between July 1, 1995, and December 31, 2020.

From 2005 onwards, we supplemented antenatal reporting of medication use with prescription data from the nationwide Swedish Prescribed Drug registry<sup>19</sup>. To account for prescriptions lasting into pregnancy, we also include any prescriptions made up to 30 days before pregnancy. This registry contains all drug dispensations in Sweden since 2005, recording ATC codes, dates of dispensations, and other related information.

We follow all children through the National Patient Register<sup>20</sup> using unique IDs assigned to each child born in Sweden<sup>17</sup>. The registry covers all inpatient care delivered in Sweden and, from approximately 2005, specialized outpatient care<sup>20</sup>. The registry is generally considered to have high validity and is routinely used for research purposes<sup>20</sup>. All diagnoses are recorded using ICD codes, and dates are marked. We collect any available data from the registry between July 1, 1995, and December 31, 2021, for all identified children. The registry was also employed to identify maternal covariates and drug indications.

In addition to the aforementioned data sources, we acquire income and education data from the Longitudinal Integrated Database for Health Insurance and Labour Market Studies (LISA)<sup>21</sup>, which encompasses socioeconomic and demographic data on all Swedish residents since 1990. This data is mandated by law, primarily for administrative purposes<sup>21</sup>.

### Uncertain pregnancies in the CPRD pregnancy register

A substantial proportion of pregnancies in the CPRD GOLD Pregnancy Register are uncertain, either having no identified outcome, or they overlap ("conflict") with other pregnancies. Ignoring these records potentially excludes periods when women were pregnant. Work by the CPRD Pregnancy Register developers<sup>22</sup> has investigated the frequency of various scenarios explaining unknown/conflicting pregnancies, and in line with their advice for drug safety studies we performed the following actions:

1. Utilise linked data to obtain additional outcomes

The CPRD Pregnancy register only utilises data from primary care record. We used HES data (HES APC, HES Maternity, HES Outpatients and HES Procedures) to identify outcomes (delivery, miscarriage, or termination of pregnancy). For deliveries, records within 266 days of pregnancy start plus 4 weeks (38 weeks) were retained, and for early pregnancy losses, records within 140 days from first antenatal record (20 weeks) were retained. HES records were only available for those with linked data (N=596,218 (48.5%)). We used the approach outlined in the CPRD Pregnancy Register validation study.<sup>8</sup>

2. Merging conflicting pregnancies episodes

We merged conflicting episodes which are consistent with the pregnancy being real but split into separate episodes by the rules of the Pregnancy Register algorithm.

3. Excluding episodes which are likely to be derived from historical data

There is evidence to suggest that historical outcomes being recorded by the GP during an ongoing pregnancy may explain a sizeable proportion of the uncertain episodes generated by the algorithm. This can lead to true pregnancies being split by the algorithm and depending on the timing this will either generate an additional episode with outcome missing or two separate episodes with outcomes.

## Exposure: maternal antiseizure medication

### Prescription data cleaning procedure – CPRD (UK)

Prescription start and end date were used to define the exposure windows. While prescription start date is available within CPRD, prescription end date was estimated by calculating a prescription length equal to daily dose divided by quantity prescribed. The cleaning procedure for daily dose and quantity are prescribed below.

In total there were 1,281,989 ASM prescription records within the study period for 44,725 women. Combining free text and structured data we were able to recover dose units information units (capsules, tablets, milligrams, millilitres, puffs, sachets and suppositories) for all but 5 prescriptions; these were removed.

Daily dose (the number of units prescribed per day) was missing for 296,953 (23%) records and quantity (the total quantity entered by the GP for the prescribed product) was missing for 813 (0.1%) records. For each ASM prescription, implausible values of daily dose and quantity prescribed were identified and set to missing. For daily dose, values of 0 (for any unit including tablets, capsules, milligrams, millilitres or puffs) and 10 or more tablets or capsules per day were considered implausible - 90,593 (7%) records had daily dose equal to 0 and 1447 (0.1%) records for tablets or capsules had a daily dose greater than 10. For quantity prescribed, values of less than 7 (for any unit) were considered implausible - 10,084 (0.8%) records had quantity values set to missing.

A single imputation procedure was then implemented to impute missing values of daily dose, followed by quantity prescribed. For daily dose prescribed, if daily dose was missing, the value was imputed using the modal daily dose within strata of the earliest possible of the following set of variables:

1. Dosage unit, patient, product code and quantity
2. Dosage unit, product code and quantity in any patient
3. Dosage unit and product code in any patient
4. Dosage unit and product name in any patient
5. Dosage unit and drug in any patient

The procedure was then repeated for quantity of medication prescribed with daily dose replaced with quantity and vice versa. The mean (SD) daily dose for non-imputed data was 4.34 (38.30) and median (IQR) = was 2 (2-3). For imputed data the mean (SD) daily dose was 3.14 (10.93) and median (IQR) was 2 (2-3). The mean (SD) quantity for non imputed data was 86.90 (89.65) and median (IQR) was 56 (60-112). For imputed data the mean (SD) quantity was 53.62 (56.17) and median (IQR) was 28 (18-84).

#### Definition of “other ASMs”

The following ASMs were included in the “other ASM” category: brivaracetam, eslicarbazepine, ethosuximide, felbamate, lacosamide, oxcarbazepine, perampanel, phenobarbital, primidone, retigabine, rufinamide, stiripentol, sulthiame, tiagabine, vigabatrin, zonisamide, clonazepam, beclamide, mesuximide, phenacemide, ethotoin, pheneturide, carisbamate, cenobamate, barbexaclone, ethadione, progabide, clobazam.

## Outcome: offspring neurodevelopmental conditions

### Eligibility for linkage to Hospital Episode Statistics data – CPRD (UK)

Of the total cohort of 518,047 children in the UK, 273,018 (52.7%) were eligible for linkage to HES data. Where children were eligible for data linkage, diagnoses made using either Read or ICD-10 codes were used to indicate presence of the outcome. Where children were ineligible for data linkage, only Read code diagnoses were used to indicate presence of the outcome. Details of the numbers and proportions diagnosed using Read codes (total sample) and ICD-10 codes (sample eligible for HES linkage only) are presented below according to exposure to any ASM during the pregnancy period. The proportion diagnosed with each neurodevelopmental condition was similar in the total cohort and the cohort eligible for linkage to HES data, though a greater proportion were diagnosed using Read codes than were diagnosed using ICD-10 codes.

|                         | Total cohort – outcome identified using Read or ICD-10 codes (N%) |                               | Cohort eligible for HES linkage - outcome identified using Read or ICD-10 codes (N%) |                               | Total cohort - outcome identified using Read codes (N%) |                               | Cohort eligible for HES linkage - outcome identified using ICD-10 codes (N%) |                               |
|-------------------------|-------------------------------------------------------------------|-------------------------------|--------------------------------------------------------------------------------------|-------------------------------|---------------------------------------------------------|-------------------------------|------------------------------------------------------------------------------|-------------------------------|
|                         | No ASM use in pregnancy (N=514,066)                               | ASM use in pregnancy (N=3981) | No ASM use in pregnancy (N=271,253)                                                  | ASM use in pregnancy (N=1765) | No ASM use in pregnancy (N=514,066)                     | ASM use in pregnancy (N=3981) | No ASM use in pregnancy (N=271,253)                                          | ASM use in pregnancy (N=1765) |
| Autism                  | 7657 (1.49)                                                       | 104 (2.61)                    | 3846 (1.42)                                                                          | 38 (2.15)                     | 6114 (1.19)                                             | 87 (2.19)                     | 2217 (0.82)                                                                  | 25 (1.42)                     |
| Intellectual disability | 1119 (0.22)                                                       | 15 (0.38)                     | 731 (0.27)                                                                           | 7 (0.40)                      | 763 (0.15)                                              | 11 (0.28)                     | 394 (0.15)                                                                   | 5 (0.28)                      |
| ADHD                    | 4794 (0.93)                                                       | 61 (1.53)                     | 2641 (0.97)                                                                          | 32 (1.81)                     | 3661 (0.71)                                             | 42 (1.06)                     | 1140 (0.42)                                                                  | 16 (0.91)                     |



## Covariates

### Antiseizure medication (ASM) indication definitions

Indications for ASMs were grouped as epilepsy, psychiatric conditions and somatic conditions. Psychiatric conditions included bipolar disorder, generalised anxiety disorder, severe depression, treatment resistant depression and off label psychiatric use of ASM medication. Somatic conditions included neuropathic pain, fibromyalgia, essential tremor, restless leg syndrome and migraine prophylaxis. In Sweden, data protection regulations (i.e., to prevent the identification of individuals due to the rarity of certain diseases) led to the truncation of somatic condition ICD codes by registry holders (e.g., ICD 10: M70-M79.9), resulting in broader definitions than in the UK. The timing for the evidence of indication in relation to pregnancy was recorded and only indications occurring before the start of pregnancy were kept. Read code and ICD-10 code lists can be found in the GitHub repository.

Details of the definition for each indication in each study site are included in the table below:

| Indication covariate | CPRD (UK) Definition |                                                                                                                                                                                                                                                                                                                                                                                                                                                                                                                                                                                                                                                                                                                                                                                                                                                                                                                                                                                                                                                                                                                                                                                                    | DOHaD (Sweden) Definition |                                                                                                                                                |
|----------------------|----------------------|----------------------------------------------------------------------------------------------------------------------------------------------------------------------------------------------------------------------------------------------------------------------------------------------------------------------------------------------------------------------------------------------------------------------------------------------------------------------------------------------------------------------------------------------------------------------------------------------------------------------------------------------------------------------------------------------------------------------------------------------------------------------------------------------------------------------------------------------------------------------------------------------------------------------------------------------------------------------------------------------------------------------------------------------------------------------------------------------------------------------------------------------------------------------------------------------------|---------------------------|------------------------------------------------------------------------------------------------------------------------------------------------|
|                      | Phenotypes           | Identification                                                                                                                                                                                                                                                                                                                                                                                                                                                                                                                                                                                                                                                                                                                                                                                                                                                                                                                                                                                                                                                                                                                                                                                     | Phenotypes                | Identification                                                                                                                                 |
| <b>Epilepsy</b>      | -                    | <p>Patients had a record of one of the following:</p> <ol style="list-style-type: none"> <li>1. A diagnosis of epilepsy in CPRD or HES; <ol style="list-style-type: none"> <li>a. CPRD: (presence of an epilepsy Read code) OR (two seizure Read codes more than 24 hours apart AND no correlating neurology outpatient appointment within one month of primary care recorded seizure code (as likely duplicates))</li> <li>b. Inpatient HES: presence of an epilepsy ICD code in any diagnostic position OR two seizure ICD codes more than 24 hours apart listed in the first diagnostic position AND the event is in the relevant medical specialty AND emergency admission</li> <li>c. Outpatient HES: Epilepsy ICD code listed in any diagnostic position</li> <li>d. Emergency HES: Two seizure ICD codes more than 24 hours apart</li> </ol> </li> <li>2. Prescription of epilepsy-specific ASMs: Epilim, Brivaracetam, Brivaracetam, Eslicarbazepine, Ethosuximide, Felbamate, Fenfluramine, Lacosamide, Levetiracetam, Mesuximide, Oxcarbazepine, Perampanel, Phenobarbital, Phenytoin, Retigabine, Rufinamide, Stiripentol, Sulthiame, Tiagabine, Vigabatrin, Zonisamide, OR;</li> </ol> | -                         | Inpatient or specialized outpatient ICD-10 G40.X diagnosis which has been preceded by a G40.X (ICD-9 345+) or R56.8 (unspecified convulsions). |

|                                |                                                                   |                                                                                                                                                                                                                                                                                                                                                                                                                                                                  |                                   |                                                                                                                                               |
|--------------------------------|-------------------------------------------------------------------|------------------------------------------------------------------------------------------------------------------------------------------------------------------------------------------------------------------------------------------------------------------------------------------------------------------------------------------------------------------------------------------------------------------------------------------------------------------|-----------------------------------|-----------------------------------------------------------------------------------------------------------------------------------------------|
|                                |                                                                   | Epilepsy-specific co-prescribing on the same day: i) Clobazam AND an ASM OR ii) rectal administration of diazepam AND an ASM OR 3) intranasal administration of Midazolam AND an ASM                                                                                                                                                                                                                                                                             |                                   |                                                                                                                                               |
| <b>Psychiatric indications</b> | Bipolar disorder                                                  | Patients had a record of one of the following: <ol style="list-style-type: none"> <li>1. Read code in CPRD or ICD-10 code in HES (any diagnostic field) for bipolar, anytime prior to pregnancy start date OR;</li> <li>2. Mood-disorder specific co-prescribing (1-Quetiapine and [valproate or lamotrigine or carbamazepine] or 2-lithium AND [valproate or lamotrigine or carbamazepine]) OR;</li> <li>3. The mood disorder-specific ASM Depakote.</li> </ol> | Bipolar disorder                  | Inpatient or specialized outpatient diagnosis: ICD-10: F30, F31; ICD-9: 296A, 296C, 296D 296E.                                                |
|                                | Generalised anxiety disorder                                      | An ASM used in psychiatry (valproate or lamotrigine or carbamazepine) along with a Read code in CPRD or ICD-10 code in HES for anxiety (any diagnostic field), anytime prior to pregnancy start date.                                                                                                                                                                                                                                                            | Generalised anxiety disorder      | ICD-10: F40-F43<br>ICD-9: 300A, 300C, 300D, 308, 309                                                                                          |
|                                | Severe depression                                                 | An ASM used in psychiatry (valproate or lamotrigine or carbamazepine) along with a READ code in CPRD or ICD-10 code in HES (any diagnostic field) for severe depression, anytime prior to pregnancy start.                                                                                                                                                                                                                                                       | Depression                        | ICD-10: F32-F39<br>ICD-9: 296B, 298A, 300E, 311                                                                                               |
|                                | Treatment-resistant schizophrenia                                 | An ASM used in psychiatry (valproate or lamotrigine or carbamazepine) along with READ code in CPRD or ICD-10 code (any diagnostic field) in HES for schizophrenia, anytime prior to pregnancy start.                                                                                                                                                                                                                                                             | Other off-label psychiatric use   | ICD-10: F00-F99<br>ICD-9 and icd-8: 29.0-29.9, 30.0-30.9, 31.0-31.9                                                                           |
|                                | Other off-label psychiatric use                                   | None of the above psychiatric indications were identified, yet there was co-prescription of antipsychotics, lithium, or antidepressants, alongside an ASM used in psychiatry (valproate or lamotrigine or carbamazepine) in CPRD.                                                                                                                                                                                                                                |                                   |                                                                                                                                               |
| <b>Somatic indications</b>     | Neuropathic pain (including diabetic neuropathy) and fibromyalgia | An ASM used in neuropathic pain management (carbamazepine, barbexalone, gabapentin, pregabalin) alongside either 1) a READ code in CPRD or ICD-10 code in HES (any diagnostic field) for a neuropathic pain disorder, anytime prior to pregnancy start or 2) evidence of codeine co-prescribing.                                                                                                                                                                 | Migraine                          | ICD-10: G43.0-G43.9<br>ICD-9 and ICD-8: 346.0-346.9                                                                                           |
|                                | Migraine prophylaxis                                              | An ASM used for the prevention of recurrent migraine (topiramate or valproate) along with a READ code in CPRD or ICD-10 code in HES (any diagnostic field) for recurrent migraine, anytime prior to pregnancy start.                                                                                                                                                                                                                                             | Chronic pain                      | ICD-10: M70.0-M79.9, R52.0-R52.9, G35.0-G35.9, G50.0-G59.9, F45.0-F45.9<br>ICD-9: 350.0-359.9, 723.0-723.9, 724.0-724.9<br>ICD-8: 350.0-358.9 |
|                                | Restless legs syndrome                                            | The ASM cenobamate is used for the treatment of restless leg syndrome along with a READ code in CPRD or ICD-10 code in HES (any diagnostic field) for restless leg syndrome, anytime prior to pregnancy start.                                                                                                                                                                                                                                                   | Diabetes (and related neuropathy) | ICD-10: E10-E14, O24.0-O24.4, O24.9<br>ICD-9: 250, 648A, 648W                                                                                 |
|                                | Essential tremors                                                 | The ASM primidone is used for the treatment of essential tremors along with a READ code in CPRD or ICD-10 code (any diagnostic field) in HES for essential tremors, anytime prior to pregnancy start.                                                                                                                                                                                                                                                            |                                   |                                                                                                                                               |

### Other covariate definitions

The following covariates were adjusted for in all analyses.

| CPRD (UK)                                               |                                                                                                                                                                                                                                                                                                                                                                                                                                                                                                                                                                                                                                              | DOHaD (Sweden)                                                                                                                                                                                   |                                                                                                          |                                                                                                                                                                       |
|---------------------------------------------------------|----------------------------------------------------------------------------------------------------------------------------------------------------------------------------------------------------------------------------------------------------------------------------------------------------------------------------------------------------------------------------------------------------------------------------------------------------------------------------------------------------------------------------------------------------------------------------------------------------------------------------------------------|--------------------------------------------------------------------------------------------------------------------------------------------------------------------------------------------------|----------------------------------------------------------------------------------------------------------|-----------------------------------------------------------------------------------------------------------------------------------------------------------------------|
| Covariate                                               | Definition                                                                                                                                                                                                                                                                                                                                                                                                                                                                                                                                                                                                                                   | Type                                                                                                                                                                                             | Definition                                                                                               | Type                                                                                                                                                                  |
| <b>Maternal age</b>                                     | Maternal age at the start of each pregnancy as defined by the Pregnancy Register. We adjusted for age and age cubed to account for non-linear trends.                                                                                                                                                                                                                                                                                                                                                                                                                                                                                        | Continuous + cubic term                                                                                                                                                                          | Same (per RTB)                                                                                           | Continuous + cubic term                                                                                                                                               |
| <b>Geographical region</b>                              | The geographical region of the mother's general practice was identified using the CPRD practice file.                                                                                                                                                                                                                                                                                                                                                                                                                                                                                                                                        | Categorical (East of England, East Midlands, London, North East, North West, South Central, South East Coast, South West, West Midlands Yorkshire and Humber, Northern Ireland, Scotland, Wales) | Maternal residential region                                                                              | Categorical (6 "super regions" which govern local health care: 1=Northern Sweden, 2=Middle Sweden, 3=Stockholm, 4=Southeast Sweden, 5=West Sweden, 6=Southern Sweden) |
| <b>Socioeconomic position</b>                           | Household deprivation quintile (Index of Multiple Deprivation (IMD)). This is a regional based deprivation score. Patient-level IMD quintiles were obtained through linkage with deprivation data for 76.97% of patients living in England. Practice-level IMD data were used for the 23.03% of patients in England where patient-level data were unavailable. Patient-level IMD data are not available for Wales, Scotland or Northern Ireland so practice-level IMD data were used for all patients living in these countries. Patient level IMD was therefore used for 52.78% of all patients and practice level IMD was used for 47.22%. | Quintiles – entered as continuous variable                                                                                                                                                       | Maternal education level (primary, secondary, university)                                                | Categorical                                                                                                                                                           |
|                                                         |                                                                                                                                                                                                                                                                                                                                                                                                                                                                                                                                                                                                                                              |                                                                                                                                                                                                  | Disposable income at birth, family weighted                                                              | Quintiles                                                                                                                                                             |
| <b>Evidence of alcohol problems or illicit drug use</b> | <p>We used a binary measure to indicate alcohol problems or illicit drug use.</p> <p>Evidence of alcohol problems was identified through medical codes indicating high alcohol consumption or prescriptions for the treatment of severe alcohol use. Records relating to alcohol</p>                                                                                                                                                                                                                                                                                                                                                         | Binary                                                                                                                                                                                           | Diagnosis of Mental and behavioural disorders due to psychoactive substance use, before pregnancy (ever) | Binary                                                                                                                                                                |

| Covariate                                                       | CPRD (UK)                                                                                                                                                                                                                                                                                                                                                                                                                                                                                                                                                                                                                                                                                                                                                                                                                                                                                                                                                                                                                                                                    | Type                        | Definition                                                         | DOHaD (Sweden)          |
|-----------------------------------------------------------------|------------------------------------------------------------------------------------------------------------------------------------------------------------------------------------------------------------------------------------------------------------------------------------------------------------------------------------------------------------------------------------------------------------------------------------------------------------------------------------------------------------------------------------------------------------------------------------------------------------------------------------------------------------------------------------------------------------------------------------------------------------------------------------------------------------------------------------------------------------------------------------------------------------------------------------------------------------------------------------------------------------------------------------------------------------------------------|-----------------------------|--------------------------------------------------------------------|-------------------------|
|                                                                 | Definition                                                                                                                                                                                                                                                                                                                                                                                                                                                                                                                                                                                                                                                                                                                                                                                                                                                                                                                                                                                                                                                                   |                             |                                                                    | Type                    |
|                                                                 | <p>consumption were identified from the maternal clinical file and additional clinical details file in CPRD and prescriptions for the treatment of severe alcohol use were identified in the therapy files. Evidence of hazardous drinking was defined as the consumption of <math>\geq 43</math> units/week, by the presence of a Read code indicating heavy drinking or by a relevant prescription. We first looked for information on alcohol consumption during each pregnancy. If there were no records during pregnancy, the most recent record in the 5 years prior was identified and used.</p> <p>Women with pre-pregnancy illicit drug use were identified in one of three ways: 1) by searching for relevant Read codes in the mother's medical records up to 3 years before the estimated start of pregnancy; 2) by searching for relevant Read codes in the mother's additional clinical details records up to 3 years before the estimated LMP; and 3) by searching the mother's prescription records for drugs used in the treatment of illicit drug use.</p> |                             |                                                                    |                         |
| <b>Gravidity at pregnancy start</b>                             | Gravidity was taken from the pregnancy register using the order of pregnancies to the same mother.                                                                                                                                                                                                                                                                                                                                                                                                                                                                                                                                                                                                                                                                                                                                                                                                                                                                                                                                                                           | Categorical (1,2,3,4,5+)    | Parity                                                             | Categorical             |
| <b>Health care utilization in the year before pregnancy</b>     | Health care utilization in the year before pregnancy was assessed using the number of GP consultations involving an interaction with a healthcare professional.                                                                                                                                                                                                                                                                                                                                                                                                                                                                                                                                                                                                                                                                                                                                                                                                                                                                                                              | Categorical (0-3, 4-10 10+) | Number of inpatient or specialized outpatient visits               | Categorical             |
| <b>Number of incident seizures in the year before pregnancy</b> | Incident seizures were identified by a Read code in the clinical or referral CPRD files, an ICD-10 code in the first diagnostic position in the HES APC linked dataset, or a Read code, ICD-10 code                                                                                                                                                                                                                                                                                                                                                                                                                                                                                                                                                                                                                                                                                                                                                                                                                                                                          | Binary (0 vs 1 or more)     | Inpatient or specialized outpatient visits with recorded epilepsy, | Binary (0 vs 1 or more) |

| Covariate                                                                     | CPRD (UK)                                                                                                                                                                          |                                                                                                  | DOHaD (Sweden)                                                                              |                                |
|-------------------------------------------------------------------------------|------------------------------------------------------------------------------------------------------------------------------------------------------------------------------------|--------------------------------------------------------------------------------------------------|---------------------------------------------------------------------------------------------|--------------------------------|
|                                                                               | Definition                                                                                                                                                                         | Type                                                                                             | Definition                                                                                  | Type                           |
|                                                                               | or an A&E diagnosis of an epilepsy related central nervous system condition in the HES A&E linked dataset. Incidents had to occur on separate days to be counted.                  |                                                                                                  | status epilepticus or convulsion                                                            |                                |
| <b>Medications taken during the periconceptional period</b>                   | Medication use in the 365 days prior to pregnancy start was ascertained from the therapy file. We created separate variables for antidepressant use and antipsychotic use.         | Two binary variables (no antidepressant/ antipsychotic use vs antidepressant/ antipsychotic use) | Antidepressant (N06) and antipsychotic use (N05), during pregnancy. Two separate variables. | Binary x2                      |
| <b>Vomiting or prescription of antiemetics during pregnancy</b>               | Presence of a read code for vomiting in the clinical or referral files or a prescription for an antiemetic in the therapy files during the pregnancy period.                       | Binary                                                                                           | A04, during pregnancy.                                                                      | Binary                         |
| <b>Calendar year of start of pregnancy</b>                                    | Taken as the year of the estimated start date of pregnancy from the pregnancy register.                                                                                            | Categorical (3 year groupings)                                                                   | Taken as the year of the estimated start date of pregnancy from the pregnancy register.     | Categorical (3 year groupings) |
| <b>Maternal neurodevelopmental condition diagnosis before pregnancy start</b> | A maternal diagnosis of autism, ID or ADHD in CPRD (using Read codes), HES admitted patient care or HES outpatient care (using ICD-10 codes) that occurred before pregnancy start. | Binary (no NDD, any NDD)                                                                         |                                                                                             |                                |

## Missing data

### CPRD GOLD (UK)

We excluded 3 children who had missing sex information. Details on how missing prescription information were dealt with are provided in the section titled “Prescription data cleaning procedure – CPRD (UK)” above. Following the data cleaning procedure for prescriptions, the exposure, outcome and all covariates selected for adjustment in models were complete.

### DOHaD (Sweden)

Pregnancies where information was missing on maternal residential region (N=4,608), household education (N=5,400), or maternal country of birth (N=203), and 2 pregnancies with infeasible dates were excluded from the cohort. In total 10,213 individuals (0.4% of the cohort) were excluded for missing data in any of these covariates.

## Statistical analysis

### Follow-up time

Follow-up time for children differed slightly by cohort due to the nature of the datasets. In CPRD end of data collection for the individual child constituted the age at transfer out of the practice (i.e. the age at which the child moved and the GP practice no longer collected data on them) or age at last collection date for the practice (i.e. the age of the child at the time the practice stopped providing data to CPRD). In DOHaD this constituted the age at migration of the child out of Sweden. The end of follow-up for the two cohorts also differed. For CPRD the end of follow-up was August 01 2021. For DOHaD the end of follow-up was December 31, 2021.

## Supplementary Results

### Supplementary Tables

**Table S1** – Country and ASM specific exposure counts and follow up time

| ASM           | CPRD (UK)                   |                              |                                 | DOHaD (Sweden)              |                              |                                 |
|---------------|-----------------------------|------------------------------|---------------------------------|-----------------------------|------------------------------|---------------------------------|
|               | Number exposed in pregnancy | Mean follow up in years (SD) | Median follow up in years (IQR) | Number exposed in pregnancy | Mean follow up in years (SD) | Median follow up in years (IQR) |
| No ASM        | 514066                      | 7.97 (4.45)                  | 7.52 (4.10-11.55)               | 2651210                     | 13.04 (7.5)                  | 12.51 (6.5-19.29)               |
| Carbamazepine | 603                         | 8.97 (4.49)                  | 9.17 (5.31-12.54)               | 2427                        | 15.24 (6.93)                 | 15.8 (9.52-21.08)               |
| Gabapentin    | 564                         | 5.74 (3.61)                  | 4.93 (3.11-7.46)                | 864                         | 6.93 (5.14)                  | 5.24 (3.05-9.34)                |
| Lamotrigine   | 939                         | 6.98 (4.140)                 | 6.18 (3.53-9.94)                | 5035                        | 7.57 (4.95)                  | 6.48 (3.61-10.66)               |
| Levetiracetam | 193                         | 5.03 (3.330)                 | 4.19 (2.56-6.79)                | 613                         | 5.43 (3.71)                  | 4.41 (2.49-7.56)                |
| Phenytoin     | 46                          | 10.57 (4.38)                 | 10.75 (7.82-13.62)              | 194                         | 19.66 (6.00)                 | 21.1 (17.37-24.4)               |
| Pregabalin    | 408                         | 5.45 (3.00)                  | 4.92 (3.07-7.25)                | 1307                        | 7.62 (3.69)                  | 7.70 (4.56-10.71)               |
| Topiramate    | 154                         | 6.16 (3.39)                  | 5.41 (3.59-8.40)                | 264                         | 8.38 (4.68)                  | 8.23 (4.21-12.07)               |
| Valproate     | 423                         | 9.18 (4.50)                  | 9.32 (5.54-12.83)               | 1178                        | 14.58 (6.44)                 | 14.88 (9.8-19.72)               |
| Other         | 78                          | 7.39 (4.25)                  | 6.83 (3.89-10.67)               | 465                         | 12.08 (7.01)                 | 11.12 (6.24-17.45)              |
| Polytherapy   | 573                         | 7.56 (4.43)                  | 7.07 (3.81-11.13)               | 1167                        | 9.67 (5.86)                  | 8.72 (4.99-13.17)               |
| Total cohort  | 518047                      | 7.96 (4.45)                  | 7.51 (4.10-11.55)               | 2664724                     | 13.03 (7.49)                 | 12.49 (6.49-19.27)              |

**Table S2 – Primary Analysis: Country specific adjusted marginal risk results**

| Outcome                                  | ASM           | CPRD (UK)                        |                    |                   |                   | DOHaD (Sweden)      |                    |                  |                  |
|------------------------------------------|---------------|----------------------------------|--------------------|-------------------|-------------------|---------------------|--------------------|------------------|------------------|
|                                          |               | Number with outcome <sup>a</sup> | Risk as % (95% CI) |                   |                   | Number with outcome | Risk as % (95% CI) |                  |                  |
|                                          |               |                                  | Age 4              | Age 8             | Age 12            |                     | Age 4              | Age 8            | Age 12           |
| Autism                                   | No ASM        | 7657                             | 0.46 (0.44-0.48)   | 1.87 (1.80-1.94)  | 3.95 (3.80-4.11)  | 68788               | 0.25 (0.24-0.26)   | 1.18 (1.15-1.22) | 2.67 (2.60-2.74) |
|                                          | Carbamazepine | 21                               | 0.71 (0.43-1.16)   | 2.87 (1.78-4.63)  | 6.00 (3.77-9.54)  | 136                 | 0.30 (0.25-0.36)   | 1.43 (1.19-1.71) | 3.21 (2.69-3.83) |
|                                          | Gabapentin    | 16                               | 0.65 (0.40-1.06)   | 2.65 (1.66-4.25)  | 5.56 (3.52-8.80)  | 21                  | 0.24 (0.16-0.37)   | 1.15 (0.76-1.76) | 2.61 (1.72-3.95) |
|                                          | Lamotrigine   | 20                               | 0.50 (0.31-0.82)   | 2.05 (1.27-3.30)  | 4.33 (2.71-6.90)  | 134                 | 0.21 (0.17-0.25)   | 0.99 (0.82-1.18) | 2.23 (1.87-2.65) |
|                                          | Levetiracetam | <5                               | 0.41 (0.10-1.68)   | 1.68 (0.42-6.73)  | 3.56 (0.91-13.91) | 8                   | 0.20 (0.10-0.40)   | 0.96 (0.48-1.91) | 2.16 (1.09-4.28) |
|                                          | Phenytoin     | <5                               | 0.55 (0.08-3.66)   | 2.23 (0.34-14.44) | 4.69 (0.76-29.08) | 10                  | 0.24 (0.13-0.45)   | 1.15 (0.62-2.14) | 2.61 (1.42-4.78) |
|                                          | Pregabalin    | 7                                | 0.36 (0.17-0.77)   | 1.49 (0.71-3.12)  | 3.16 (1.53-6.54)  | 47                  | 0.18 (0.13-0.23)   | 0.83 (0.63-1.11) | 1.89 (1.42-2.51) |
|                                          | Topiramate    | <5                               | 0.14 (0.02-1.02)   | 0.58 (0.08-4.16)  | 1.24 (0.18-8.80)  | 13                  | 0.31 (0.18-0.54)   | 1.49 (0.87-2.55) | 3.35 (1.98-5.66) |
|                                          | Valproate     | 14                               | 0.69 (0.40-1.20)   | 2.80 (1.63-4.81)  | 5.87 (3.47-9.91)  | 111                 | 0.45 (0.37-0.55)   | 2.13 (1.75-2.58) | 4.73 (3.93-5.71) |
|                                          | Other         | <5                               | 0.75 (0.24-2.33)   | 3.03 (1.00-9.18)  | 6.32 (2.16-18.52) | 30                  | 0.32 (0.22-0.46)   | 1.50 (1.06-2.15) | 3.38 (2.39-4.78) |
|                                          | Polytherapy   | 19                               | 0.71 (0.43-1.17)   | 2.88 (1.77-4.67)  | 6.02 (3.76-9.63)  | 73                  | 0.37 (0.29-0.48)   | 1.77 (1.40-2.24) | 3.96 (3.15-4.99) |
| Intellectual disability                  | No ASM        | 1119                             | 0.06 (0.06-0.07)   | 0.20 (0.19-0.22)  | 0.44 (0.40-0.48)  | 24323               | 0.16 (0.15-0.16)   | 0.53 (0.52-0.54) | 0.96 (0.94-0.98) |
|                                          | Carbamazepine | <5                               | 0.11 (0.04-0.31)   | 0.34 (0.12-0.98)  | 0.73 (0.26-2.11)  | 64                  | 0.20 (0.15-0.26)   | 0.69 (0.53-0.90) | 1.23 (0.94-1.60) |
|                                          | Gabapentin    | 0                                | 0.00 (0.00-0.00)   | 0.00 (0.00-0.00)  | 0.00 (0.00-0.00)  | 7                   | 0.16 (0.08-0.34)   | 0.55 (0.26-1.14) | 0.98 (0.47-2.05) |
|                                          | Lamotrigine   | <5                               | 0.10 (0.04-0.28)   | 0.32 (0.11-0.89)  | 0.69 (0.25-1.91)  | 60                  | 0.17 (0.13-0.23)   | 0.58 (0.45-0.77) | 1.05 (0.80-1.37) |
|                                          | Levetiracetam | 0                                | 0.00 (0.00-0.00)   | 0.00 (0.00-0.00)  | 0.00 (0.00-0.00)  | <5                  | 0.10 (0.03-0.32)   | 0.35 (0.11-1.10) | 0.63 (0.20-1.96) |
|                                          | Phenytoin     | 0                                | 0.00 (0.00-0.00)   | 0.00 (0.00-0.00)  | 0.00 (0.00-0.00)  | <5                  | 0.11 (0.03-0.33)   | 0.36 (0.12-1.12) | 0.65 (0.21-2.01) |
|                                          | Pregabalin    | 0                                | 0.00 (0.00-0.00)   | 0.00 (0.00-0.00)  | 0.00 (0.00-0.00)  | 16                  | 0.13 (0.08-0.22)   | 0.46 (0.28-0.75) | 0.82 (0.50-1.34) |
|                                          | Topiramate    | <5                               | 0.20 (0.03-1.45)   | 0.63 (0.09-4.55)  | 1.36 (0.19-9.72)  | 7                   | 0.38 (0.18-0.79)   | 1.28 (0.61-2.67) | 2.28 (1.10-4.73) |
|                                          | Valproate     | <5                               | 0.07 (0.02-0.28)   | 0.21 (0.05-0.88)  | 0.46 (0.11-1.90)  | 64                  | 0.41 (0.32-0.54)   | 1.40 (1.08-1.82) | 2.49 (1.92-3.23) |
|                                          | Other         | 0                                | 0.00 (0.00-0.00)   | 0.00 (0.00-0.00)  | 0.00 (0.00-0.00)  | 8                   | 0.14 (0.07-0.29)   | 0.48 (0.24-0.97) | 0.87 (0.43-1.73) |
|                                          | Polytherapy   | <5                               | 0.12 (0.04-0.35)   | 0.39 (0.14-1.10)  | 0.85 (0.31-2.36)  | 43                  | 0.32 (0.23-0.44)   | 1.08 (0.79-1.48) | 1.93 (1.41-2.65) |
| Attention Deficit Hyperactivity Disorder | No ASM        | 4794                             | 0.08 (0.07-0.09)   | 0.93 (0.88-0.97)  | 2.10 (1.99-2.21)  | 147608              | 0.04 (0.03-0.05)   | 1.47 (1.29-1.67) | 5.70 (5.09-6.38) |
|                                          | Carbamazepine | 13                               | 0.12 (0.07-0.21)   | 1.39 (0.81-2.40)  | 3.14 (1.84-5.34)  | 257                 | 0.04 (0.03-0.05)   | 1.53 (1.28-1.84) | 5.94 (5.04-7.01) |
|                                          | Gabapentin    | 9                                | 0.14 (0.07-0.28)   | 1.63 (0.85-3.12)  | 3.67 (1.95-6.91)  | 39                  | 0.04 (0.03-0.06)   | 1.65 (1.18-2.29) | 6.35 (4.67-8.64) |
|                                          | Lamotrigine   | 14                               | 0.13 (0.07-0.23)   | 1.51 (0.87-2.64)  | 3.40 (1.97-5.87)  | 243                 | 0.03 (0.03-0.04)   | 1.27 (1.05-1.52) | 4.96 (4.19-5.87) |
|                                          | Levetiracetam | <5                               | 0.12 (0.02-0.63)   | 1.37 (0.27-7.05)  | 3.09 (0.62-15.39) | 14                  | 0.04 (0.02-0.07)   | 1.49 (0.87-2.53) | 5.78 (3.51-9.52) |
|                                          | Phenytoin     | <5                               | 0.17 (0.02-1.23)   | 1.97 (0.29-13.53) | 4.41 (0.68-28.69) | 26                  | 0.04 (0.03-0.07)   | 1.66 (1.11-2.47) | 6.39 (4.41-9.27) |
|                                          | Pregabalin    | <5                               | 0.07 (0.02-0.24)   | 0.86 (0.27-2.71)  | 1.94 (0.62-6.06)  | 88                  | 0.03 (0.02-0.03)   | 0.99 (0.77-1.26) | 3.91 (3.10-4.92) |
|                                          | Topiramate    | <5                               | 0.06 (0.01-0.43)   | 0.67 (0.09-4.89)  | 1.52 (0.21-10.93) | 15                  | 0.03 (0.02-0.05)   | 1.18 (0.71-1.98) | 4.65 (2.86-7.57) |
|                                          | Valproate     | 10                               | 0.12 (0.06-0.25)   | 1.37 (0.67-2.81)  | 3.09 (1.52-6.25)  | 164                 | 0.05 (0.04-0.06)   | 1.73 (1.41-2.11) | 6.65 (5.55-7.98) |
|                                          | Other         | <5                               | 0.08 (0.01-0.62)   | 0.97 (0.13-7.05)  | 2.21 (0.31-15.56) | 48                  | 0.04 (0.03-0.05)   | 1.39 (1.02-1.89) | 5.40 (4.06-7.20) |
|                                          | Polytherapy   | 8                                | 0.09 (0.04-0.20)   | 1.04 (0.48-2.25)  | 2.37 (1.11-5.05)  | 102                 | 0.04 (0.03-0.06)   | 1.64 (1.29-2.07) | 6.32 (5.10-7.83) |

<sup>a</sup> Number with outcome at the end of follow up



**Table S3 – Primary Analysis: Pooled adjusted marginal risk results**

| Outcome                                  | ASM           | Risk as % (95% CI) |                  |                  | Weight for DOHaD (Sweden) (%) |             |             |
|------------------------------------------|---------------|--------------------|------------------|------------------|-------------------------------|-------------|-------------|
|                                          |               | Age 4              | Age 8            | Age 12           | Age 4                         | Age 8       | Age 12      |
| Autism                                   | No ASM        | 0.29 (0.28-0.30)   | 1.39 (1.36-1.42) | 3.01 (2.94-3.08) | 75.3                          | 64.6        | 69.5        |
|                                          | Carbamazepine | 0.33 (0.28-0.40)   | 1.56 (1.31-1.84) | 3.47 (2.94-4.09) | 87.8                          | 87.6        | 87.4        |
|                                          | Gabapentin    | 0.38 (0.27-0.52)   | 1.67 (1.22-2.29) | 3.67 (2.70-5.00) | 55.8                          | 55.3        | 54.8        |
|                                          | Lamotrigine   | 0.23 (0.19-0.27)   | 1.08 (0.91-1.27) | 2.42 (2.05-2.85) | 88                            | 87.8        | 87.7        |
|                                          | Levetiracetam | 0.23 (0.12-0.43)   | 1.07 (0.58-1.98) | 2.39 (1.30-4.40) | 80.2                          | 80.1        | 80          |
|                                          | Phenytoin     | 0.26 (0.15-0.48)   | 1.23 (0.69-2.21) | 2.76 (1.55-4.91) | 90.3                          | 90.2        | 90.1        |
|                                          | Pregabalin    | 0.19 (0.15-0.25)   | 0.90 (0.69-1.17) | 2.02 (1.55-2.63) | 87                            | 87          | 86.9        |
|                                          | Topiramate    | 0.30 (0.18-0.50)   | 1.40 (0.83-2.34) | 3.13 (1.89-5.20) | 93                            | 93.1        | 93.3        |
|                                          | Valproate     | 0.47 (0.39-0.57)   | 2.19 (1.83-2.63) | 4.85 (4.07-5.78) | 88.8                          | 88.8        | 88.7        |
|                                          | Other         | 0.34 (0.24-0.48)   | 1.61 (1.15-2.25) | 3.59 (2.58-4.99) | 90.9                          | 90.7        | 90.5        |
|                                          | Polytherapy   | 0.42 (0.34-0.53)   | 1.94 (1.57-2.40) | 4.29 (3.49-5.28) | 81                            | 80.8        | 80.7        |
| Intellectual disability                  | No ASM        | 0.15 (0.14-0.15)   | 0.50 (0.49-0.51) | 0.92 (0.90-0.94) | 92.7                          | 93.9        | 95.1        |
|                                          | Carbamazepine | 0.19 (0.15-0.25)   | 0.66 (0.51-0.85) | 1.19 (0.92-1.54) | 94.1                          | 94.1        | 94.1        |
|                                          | Gabapentin    | 0.16 (0.08-0.34)   | 0.55 (0.26-1.14) | 0.98 (0.47-2.05) | 100                           | 100         | 100         |
|                                          | Lamotrigine   | 0.17 (0.13-0.22)   | 0.56 (0.43-0.73) | 1.02 (0.79-1.32) | 93.4                          | 93.5        | 93.5        |
|                                          | Levetiracetam | 0.10 (0.03-0.32)   | 0.35 (0.11-1.10) | 0.63 (0.20-1.96) | 100                           | 100         | 100         |
|                                          | Phenytoin     | 0.11 (0.03-0.33)   | 0.36 (0.12-1.12) | 0.65 (0.21-2.01) | 100                           | 100         | 100         |
|                                          | Pregabalin    | 0.13 (0.08-0.22)   | 0.46 (0.28-0.75) | 0.82 (0.50-1.34) | 100                           | 100         | 100         |
|                                          | Topiramate    | 0.35 (0.17-0.70)   | 1.17 (0.59-2.33) | 2.14 (1.08-4.24) | 87.7                          | 87.8        | 87.9        |
|                                          | Valproate     | 0.39 (0.30-0.50)   | 1.31 (1.02-1.70) | 2.36 (1.83-3.05) | 96.7                          | 96.8        | 96.8        |
|                                          | Other         | 0.14 (0.07-0.29)   | 0.48 (0.24-0.97) | 0.87 (0.43-1.73) | 100                           | 100         | 100         |
|                                          | Polytherapy   | 0.29 (0.22-0.40)   | 0.99 (0.73-1.34) | 1.80 (1.33-2.43) | 91.1                          | 91.2        | 91.3        |
| Attention Deficit Hyperactivity Disorder | No ASM        | 0.06 (0.06-0.07)   | 0.98 (0.94-1.03) | 2.50 (2.39-2.63) | <b>31.2</b>                   | <b>13.3</b> | <b>17.6</b> |
|                                          | Carbamazepine | 0.05 (0.04-0.06)   | 1.52 (1.28-1.81) | 5.62 (4.80-6.58) | 89.4                          | 89.9        | 91.3        |
|                                          | Gabapentin    | 0.06 (0.04-0.08)   | 1.64 (1.22-2.21) | 5.72 (4.34-7.54) | 79                            | 79.2        | 80.9        |
|                                          | Lamotrigine   | 0.04 (0.03-0.05)   | 1.29 (1.08-1.54) | 4.80 (4.09-5.64) | 89.7                          | 90.1        | 91.3        |
|                                          | Levetiracetam | 0.04 (0.03-0.07)   | 1.48 (0.89-2.45) | 5.47 (3.40-8.81) | 90.3                          | 90.5        | 91.2        |
|                                          | Phenytoin     | 0.05 (0.03-0.07)   | 1.67 (1.13-2.47) | 6.30 (4.38-9.07) | 95.8                          | 95.9        | 96.2        |
|                                          | Pregabalin    | 0.03 (0.02-0.04)   | 0.98 (0.77-1.25) | 3.80 (3.03-4.77) | 95.5                          | 95.6        | 96          |
|                                          | Topiramate    | 0.03 (0.02-0.05)   | 1.14 (0.69-1.88) | 4.36 (2.72-7.00) | 93.6                          | 93.8        | 94.3        |
|                                          | Valproate     | 0.05 (0.04-0.06)   | 1.70 (1.40-2.06) | 6.34 (5.32-7.56) | 92.3                          | 92.7        | 93.8        |
|                                          | Other         | 0.04 (0.03-0.05)   | 1.37 (1.01-1.86) | 5.30 (3.99-7.04) | 97.5                          | 97.6        | 97.9        |
|                                          | Polytherapy   | 0.05 (0.04-0.06)   | 1.57 (1.26-1.97) | 5.88 (4.78-7.22) | 91.1                          | 91.5        | 92.6        |

**Table S4 – Primary Analysis: Country specific risk difference results**

| Outcome                                  | ASM           | CPRD (UK) - Risk Difference as % (95% CI) |                      |                      | DOHaD (Sweden) - Risk Difference as % (95% CI) |                      |                      |
|------------------------------------------|---------------|-------------------------------------------|----------------------|----------------------|------------------------------------------------|----------------------|----------------------|
|                                          |               | Age 4                                     | Age 8                | Age 12               | Age 4                                          | Age 8                | Age 12               |
| Autism                                   | No ASM        | 0 (Reference)                             | 0 (Reference)        | 0 (Reference)        | 0 (Reference)                                  | 0 (Reference)        | 0 (Reference)        |
|                                          | Carbamazepine | 0.25 (-0.10, 0.60)                        | 1.00 (-0.38, 2.37)   | 2.05 (-0.74, 4.83)   | 0.05 (-0.00, 0.11)                             | 0.24 (-0.01, 0.50)   | 0.54 (-0.02, 1.10)   |
|                                          | Gabapentin    | 0.20 (-0.12, 0.51)                        | 0.78 (-0.46, 2.03)   | 1.61 (-0.93, 4.16)   | -0.01 (-0.11, 0.10)                            | -0.03 (-0.52, 0.46)  | -0.07 (-1.15, 1.02)  |
|                                          | Lamotrigine   | 0.05 (-0.20, 0.29)                        | 0.18 (-0.80, 1.16)   | 0.38 (-1.64, 2.40)   | -0.04 (-0.08, -0.01)                           | -0.20 (-0.37, -0.03) | -0.44 (-0.83, -0.06) |
|                                          | Levetiracetam | -0.05 (-0.62, 0.53)                       | -0.19 (-2.52, 2.14)  | -0.39 (-5.25, 4.46)  | -0.05 (-0.19, 0.09)                            | -0.23 (-0.89, 0.43)  | -0.51 (-1.98, 0.97)  |
|                                          | Phenytoin     | 0.09 (-0.95, 1.13)                        | 0.36 (-3.80, 4.52)   | 0.74 (-7.82, 9.29)   | -0.01 (-0.16, 0.15)                            | -0.03 (-0.74, 0.68)  | -0.07 (-1.64, 1.51)  |
|                                          | Pregabalin    | -0.09 (-0.37, 0.18)                       | -0.38 (-1.48, 0.72)  | -0.79 (-3.09, 1.51)  | -0.07 (-0.12, -0.02)                           | -0.35 (-0.59, -0.11) | -0.78 (-1.31, -0.25) |
|                                          | Topiramate    | -0.32 (-0.60, -0.04)                      | -1.29 (-2.43, -0.14) | -2.71 (-5.14, -0.27) | 0.07 (-0.11, 0.24)                             | 0.31 (-0.49, 1.10)   | 0.68 (-1.08, 2.43)   |
|                                          | Valproate     | 0.23 (-0.15, 0.62)                        | 0.94 (-0.58, 2.45)   | 1.92 (-1.16, 4.99)   | 0.20 (0.11, 0.29)                              | 0.94 (0.54, 1.35)    | 2.06 (1.18, 2.94)    |
|                                          | Other         | 0.29 (-0.56, 1.14)                        | 1.16 (-2.20, 4.52)   | 2.37 (-4.42, 9.16)   | 0.07 (-0.05, 0.18)                             | 0.32 (-0.21, 0.85)   | 0.71 (-0.46, 1.88)   |
|                                          | Polytherapy   | 0.25 (-0.10, 0.60)                        | 1.01 (-0.38, 2.40)   | 2.07 (-0.76, 4.89)   | 0.13 (0.04, 0.21)                              | 0.59 (0.17, 1.00)    | 1.29 (0.38, 2.20)    |
| Intellectual disability                  | No ASM        | 0 (Reference)                             | 0 (Reference)        | 0 (Reference)        | 0 (Reference)                                  | 0 (Reference)        | 0 (Reference)        |
|                                          | Carbamazepine | 0.04 (-0.07, 0.16)                        | 0.14 (-0.22, 0.50)   | 0.30 (-0.48, 1.07)   | 0.05 (-0.01, 0.10)                             | 0.15 (-0.03, 0.34)   | 0.27 (-0.05, 0.60)   |
|                                          | Gabapentin    | -                                         | -                    | -                    | 0.00 (-0.12, 0.12)                             | 0.01 (-0.39, 0.42)   | 0.02 (-0.70, 0.75)   |
|                                          | Lamotrigine   | 0.04 (-0.07, 0.14)                        | 0.12 (-0.21, 0.44)   | 0.25 (-0.45, 0.95)   | 0.02 (-0.03, 0.06)                             | 0.05 (-0.11, 0.21)   | 0.09 (-0.19, 0.37)   |
|                                          | Levetiracetam | -                                         | -                    | -                    | -0.05 (-0.17, 0.06)                            | -0.18 (-0.58, 0.22)  | -0.33 (-1.04, 0.39)  |
|                                          | Phenytoin     | -                                         | -                    | -                    | -0.05 (-0.17, 0.07)                            | -0.17 (-0.58, 0.24)  | -0.31 (-1.04, 0.42)  |
|                                          | Pregabalin    | -                                         | -                    | -                    | -0.02 (-0.09, 0.04)                            | -0.07 (-0.30, 0.15)  | -0.13 (-0.54, 0.27)  |
|                                          | Topiramate    | 0.14 (-0.26, 0.53)                        | 0.43 (-0.82, 1.67)   | 0.92 (-1.75, 3.60)   | 0.22 (-0.06, 0.50)                             | 0.74 (-0.20, 1.68)   | 1.32 (-0.34, 2.98)   |
|                                          | Valproate     | 0.00 (-0.09, 0.10)                        | 0.01 (-0.29, 0.31)   | 0.02 (-0.63, 0.67)   | 0.26 (0.15, 0.37)                              | 0.87 (0.50, 1.23)    | 1.54 (0.89, 2.19)    |
|                                          | Other         | -                                         | -                    | -                    | -0.01 (-0.11, 0.08)                            | -0.05 (-0.39, 0.29)  | -0.09 (-0.69, 0.51)  |
|                                          | Polytherapy   | 0.06 (-0.07, 0.19)                        | 0.19 (-0.21, 0.59)   | 0.41 (-0.45, 1.28)   | 0.16 (0.06, 0.26)                              | 0.55 (0.20, 0.89)    | 0.98 (0.37, 1.58)    |
| Attention Deficit Hyperactivity Disorder | No ASM        | 0 (Reference)                             | 0 (Reference)        | 0 (Reference)        | 0 (Reference)                                  | 0 (Reference)        | 0 (Reference)        |
|                                          | Carbamazepine | 0.04 (-0.03, 0.11)                        | 0.47 (-0.29, 1.22)   | 1.04 (-0.63, 2.70)   | 0.00 (-0.00, 0.01)                             | 0.07 (-0.13, 0.26)   | 0.24 (-0.48, 0.96)   |
|                                          | Gabapentin    | 0.06 (-0.03, 0.16)                        | 0.71 (-0.35, 1.77)   | 1.57 (-0.75, 3.89)   | 0.00 (-0.01, 0.02)                             | 0.18 (-0.33, 0.68)   | 0.65 (-1.18, 2.48)   |
|                                          | Lamotrigine   | 0.05 (-0.02, 0.13)                        | 0.59 (-0.25, 1.43)   | 1.30 (-0.55, 3.15)   | -0.01 (-0.01, -0.00)                           | -0.20 (-0.37, -0.03) | -0.74 (-1.36, -0.12) |
|                                          | Levetiracetam | 0.04 (-0.16, 0.24)                        | 0.44 (-1.80, 2.69)   | 0.99 (-3.97, 5.95)   | 0.00 (-0.02, 0.02)                             | 0.02 (-0.75, 0.79)   | 0.08 (-2.73, 2.89)   |
|                                          | Phenytoin     | 0.09 (-0.25, 0.43)                        | 1.05 (-2.75, 4.84)   | 2.31 (-5.95, 10.56)  | 0.01 (-0.01, 0.02)                             | 0.19 (-0.44, 0.81)   | 0.69 (-1.58, 2.96)   |
|                                          | Pregabalin    | -0.01 (-0.09, 0.08)                       | -0.07 (-1.05, 0.91)  | -0.16 (-2.36, 2.05)  | -0.01 (-0.02, -0.01)                           | -0.48 (-0.69, -0.27) | -1.79 (-2.59, -1.00) |
|                                          | Topiramate    | -0.02 (-0.14, 0.09)                       | -0.26 (-1.59, 1.07)  | -0.58 (-3.58, 2.41)  | -0.01 (-0.02, 0.01)                            | -0.28 (-0.87, 0.30)  | -1.05 (-3.26, 1.15)  |
|                                          | Valproate     | 0.04 (-0.05, 0.13)                        | 0.44 (-0.54, 1.43)   | 0.99 (-1.19, 3.16)   | 0.01 (-0.00, 0.01)                             | 0.26 (-0.01, 0.53)   | 0.95 (-0.02, 1.92)   |
|                                          | Other         | 0.00 (-0.16, 0.17)                        | 0.05 (-1.88, 1.98)   | 0.11 (-4.20, 4.42)   | -0.00 (-0.01, 0.01)                            | -0.08 (-0.47, 0.30)  | -0.30 (-1.72, 1.13)  |
|                                          | Polytherapy   | 0.01 (-0.06, 0.08)                        | 0.12 (-0.68, 0.92)   | 0.27 (-1.53, 2.06)   | 0.00 (-0.00, 0.01)                             | 0.17 (-0.15, 0.49)   | 0.62 (-0.55, 1.78)   |

**Table S5 – Primary Analysis: Pooled risk difference (relative to no ASM) results**

| Outcome                                  | ASM           | Risk Difference as % (95% CI) |                      |                      | Weight for DOHaD (Sweden) (%) |       |        |
|------------------------------------------|---------------|-------------------------------|----------------------|----------------------|-------------------------------|-------|--------|
|                                          |               | Age 4                         | Age 8                | Age 12               | Age 4                         | Age 8 | Age 12 |
| Autism                                   | No ASM        | 0 (Reference)                 | 0 (Reference)        | 0 (Reference)        | -                             | -     | -      |
|                                          | Carbamazepine | 0.06 (0.00, 0.11)             | 0.27 (0.02, 0.52)    | 0.60 (0.05, 1.15)    | 97.6                          | 96.7  | 96.1   |
|                                          | Gabapentin    | 0.01 (-0.08, 0.11)            | 0.08 (-0.38, 0.53)   | 0.19 (-0.81, 1.19)   | 90.1                          | 86.8  | 84.7   |
|                                          | Lamotrigine   | -0.04 (-0.08, -0.00)          | -0.19 (-0.36, -0.02) | -0.41 (-0.79, -0.03) | 97.8                          | 96.9  | 96.4   |
|                                          | Levetiracetam | -0.05 (-0.18, 0.09)           | -0.23 (-0.86, 0.41)  | -0.50 (-1.91, 0.91)  | 94.5                          | 92.6  | 91.6   |
|                                          | Phenytoin     | -0.00 (-0.15, 0.15)           | -0.02 (-0.72, 0.68)  | -0.04 (-1.59, 1.51)  | 97.9                          | 97.2  | 96.7   |
|                                          | Pregabalin    | -0.08 (-0.12, -0.03)          | -0.35 (-0.58, -0.12) | -0.78 (-1.30, -0.26) | 96.7                          | 95.5  | 94.9   |
|                                          | Topiramate    | -0.04 (-0.18, 0.11)           | -0.22 (-0.87, 0.44)  | -0.48 (-1.91, 0.95)  | 72.7                          | 67.3  | 65.8   |
|                                          | Valproate     | 0.20 (0.12, 0.29)             | 0.94 (0.55, 1.33)    | 2.05 (1.21, 2.90)    | 94.9                          | 93.3  | 92.5   |
|                                          | Other         | 0.07 (-0.04, 0.19)            | 0.34 (-0.19, 0.87)   | 0.76 (-0.40, 1.91)   | 98.2                          | 97.5  | 97.1   |
|                                          | Polytherapy   | 0.13 (0.05, 0.22)             | 0.62 (0.22, 1.02)    | 1.36 (0.50, 2.23)    | 93.9                          | 91.8  | 90.6   |
| Intellectual disability                  | No ASM        | 0 (Reference)                 | 0 (Reference)        | 0 (Reference)        | -                             | -     | -      |
|                                          | Carbamazepine | 0.04 (-0.00, 0.09)            | 0.15 (-0.01, 0.31)   | 0.28 (-0.03, 0.58)   | 81.7                          | 79.5  | 85     |
|                                          | Gabapentin    | 0.00 (-0.12, 0.12)            | 0.01 (-0.39, 0.42)   | 0.02 (-0.70, 0.75)   | 100                           | 100   | 100    |
|                                          | Lamotrigine   | 0.02 (-0.02, 0.06)            | 0.06 (-0.08, 0.21)   | 0.11 (-0.15, 0.38)   | 83                            | 80.9  | 86.1   |
|                                          | Levetiracetam | -0.05 (-0.17, 0.06)           | -0.18 (-0.58, 0.22)  | -0.33 (-1.04, 0.39)  | 100                           | 100   | 100    |
|                                          | Phenytoin     | -0.05 (-0.17, 0.07)           | -0.17 (-0.58, 0.24)  | -0.31 (-1.04, 0.42)  | 100                           | 100   | 100    |
|                                          | Pregabalin    | -0.02 (-0.09, 0.04)           | -0.07 (-0.30, 0.15)  | -0.13 (-0.54, 0.27)  | 100                           | 100   | 100    |
|                                          | Topiramate    | 0.19 (-0.04, 0.42)            | 0.63 (-0.12, 1.38)   | 1.21 (-0.20, 2.62)   | 66.7                          | 63.8  | 72.1   |
|                                          | Valproate     | 0.11 (0.04, 0.18)             | 0.35 (0.12, 0.59)    | 0.78 (0.32, 1.24)    | 43.1                          | 40.3  | 50.3   |
|                                          | Other         | -0.01 (-0.11, 0.08)           | -0.05 (-0.39, 0.29)  | -0.09 (-0.69, 0.51)  | 100                           | 100   | 100    |
|                                          | Polytherapy   | 0.12 (0.04, 0.20)             | 0.40 (0.14, 0.66)    | 0.79 (0.29, 1.29)    | 61                            | 58    | 67     |
| Attention Deficit Hyperactivity Disorder | No ASM        | 0 (Reference)                 | 0 (Reference)        | 0 (Reference)        | -                             | -     | -      |
|                                          | Carbamazepine | 0.00 (-0.00, 0.01)            | 0.09 (-0.10, 0.28)   | 0.37 (-0.29, 1.03)   | 99.3                          | 93.6  | 84.3   |
|                                          | Gabapentin    | 0.01 (-0.01, 0.02)            | 0.28 (-0.18, 0.73)   | 1.00 (-0.43, 2.44)   | 97.9                          | 81.5  | 61.7   |
|                                          | Lamotrigine   | -0.01 (-0.01, -0.00)          | -0.17 (-0.33, -0.01) | -0.53 (-1.12, 0.05)  | 99.6                          | 96.2  | 90     |
|                                          | Levetiracetam | 0.00 (-0.02, 0.02)            | 0.06 (-0.66, 0.79)   | 0.30 (-2.15, 2.74)   | 98.9                          | 89.6  | 75.7   |
|                                          | Phenytoin     | 0.01 (-0.01, 0.02)            | 0.21 (-0.41, 0.83)   | 0.80 (-1.39, 2.99)   | 99.7                          | 97.4  | 93     |
|                                          | Pregabalin    | -0.01 (-0.02, -0.01)          | -0.46 (-0.67, -0.25) | -1.61 (-2.35, -0.86) | 99.5                          | 95.5  | 88.5   |
|                                          | Topiramate    | -0.01 (-0.02, 0.01)           | -0.28 (-0.82, 0.26)  | -0.89 (-2.66, 0.89)  | 98.1                          | 83.5  | 64.8   |
|                                          | Valproate     | 0.01 (-0.00, 0.01)            | 0.27 (0.01, 0.53)    | 0.96 (0.07, 1.84)    | 99.3                          | 93    | 83.4   |
|                                          | Other         | -0.00 (-0.01, 0.01)           | -0.08 (-0.45, 0.30)  | -0.26 (-1.61, 1.10)  | 99.6                          | 96.2  | 90.2   |
|                                          | Polytherapy   | 0.00 (-0.00, 0.01)            | 0.16 (-0.14, 0.46)   | 0.51 (-0.46, 1.49)   | 98.5                          | 86.3  | 70.4   |

**Table S6 – Primary Analysis: Country specific and combined hazard ratio results**

| Outcome                                  | ASM           | CPRD (UK) |                       | DOHaD (Sweden) |                       | Combined              |
|------------------------------------------|---------------|-----------|-----------------------|----------------|-----------------------|-----------------------|
|                                          |               | Weighting | Adjusted HR (95 % CI) | Weighting      | Adjusted HR (95 % CI) | Adjusted HR (95 % CI) |
| Autism                                   | No ASM        | -         | 1 (Reference)         | -              | 1 (Reference)         | 1 (Reference)         |
|                                          | Carbamazepine | 12        | 1.55 (0.94-2.53)      | 88             | 1.21 (1.01-1.45)      | 1.25 (1.05-1.48)      |
|                                          | Gabapentin    | 44        | 1.43 (0.88-2.32)      | 56             | 0.97 (0.64-1.50)      | 1.15 (0.84-1.59)      |
|                                          | Lamotrigine   | 11.9      | 1.10 (0.67-1.78)      | 88.1           | 0.83 (0.69-0.99)      | 0.86 (0.72-1.01)      |
|                                          | Levetiracetam | 19.7      | 0.90 (0.22-3.67)      | 80.3           | 0.80 (0.40-1.62)      | 0.82 (0.44-1.54)      |
|                                          | Phenytoin     | 9.7       | 1.19 (0.18-8.05)      | 90.3           | 0.97 (0.52-1.82)      | 0.99 (0.55-1.80)      |
|                                          | Pregabalin    | 12.9      | 0.79 (0.37-1.67)      | 87.1           | 0.70 (0.53-0.93)      | 0.71 (0.54-0.93)      |
|                                          | Topiramate    | 7.1       | 0.31 (0.04-2.21)      | 92.9           | 1.26 (0.73-2.18)      | 1.14 (0.68-1.93)      |
|                                          | Valproate     | 11        | 1.51 (0.87-2.63)      | 89             | 1.82 (1.49-2.21)      | 1.78 (1.48-2.14)      |
|                                          | Other         | 9         | 1.63 (0.52-5.12)      | 91             | 1.28 (0.89-1.83)      | 1.30 (0.93-1.84)      |
|                                          | Polytherapy   | 18.8      | 1.55 (0.94-2.55)      | 81.2           | 1.51 (1.19-1.91)      | 1.51 (1.22-1.88)      |
| Intellectual disability                  | No ASM        | -         | 1 (Reference)         | -              | 1 (Reference)         | 1 (Reference)         |
|                                          | Carbamazepine | 6         | 1.67 (0.58-4.85)      | 94             | 1.28 (0.98-1.68)      | 1.30 (1.01-1.69)      |
|                                          | Gabapentin    | -         | -                     | 100            | 1.02 (0.49-2.15)      | 1.02 (0.49-2.15)      |
|                                          | Lamotrigine   | 6.6       | 1.57 (0.57-4.38)      | 93.4           | 1.09 (0.83-1.44)      | 1.12 (0.86-1.46)      |
|                                          | Levetiracetam | -         | -                     | 100            | 0.66 (0.21-2.05)      | 0.66 (0.21-2.05)      |
|                                          | Phenytoin     | -         | -                     | 100            | 0.67 (0.22-2.10)      | 0.67 (0.22-2.10)      |
|                                          | Pregabalin    | -         | -                     | 100            | 0.86 (0.52-1.40)      | 0.86 (0.52-1.40)      |
|                                          | Topiramate    | 12.3      | 3.12 (0.43-22.82)     | 87.7           | 2.40 (1.14-5.06)      | 2.48 (1.23-4.98)      |
|                                          | Valproate     | 3.3       | 1.04 (0.25-4.34)      | 96.7           | 2.64 (2.02-3.44)      | 2.56 (1.97-3.32)      |
|                                          | Other         | -         | -                     | 100            | 0.90 (0.45-1.81)      | 0.90 (0.45-1.81)      |
|                                          | Polytherapy   | 8.9       | 1.95 (0.70-5.43)      | 91.1           | 2.03 (1.47-2.80)      | 2.02 (1.49-2.75)      |
| Attention Deficit Hyperactivity Disorder | No ASM        |           | 1 (Reference)         |                | 1 (Reference)         | 1 (Reference)         |
|                                          | Carbamazepine | 5.4       | 1.51 (0.87-2.61)      | 94.6           | 1.05 (0.92-1.19)      | 1.07 (0.94-1.21)      |
|                                          | Gabapentin    | 18.5      | 1.77 (0.92-3.43)      | 81.5           | 1.13 (0.82-1.54)      | 1.22 (0.92-1.63)      |
|                                          | Lamotrigine   | 5.2       | 1.64 (0.93-2.89)      | 94.8           | 0.86 (0.75-0.98)      | 0.89 (0.78-1.01)      |
|                                          | Levetiracetam | 9.1       | 1.48 (0.28-7.83)      | 90.9           | 1.02 (0.60-1.72)      | 1.05 (0.64-1.74)      |
|                                          | Phenytoin     | 3.7       | 2.15 (0.30-15.39)     | 96.3           | 1.13 (0.77-1.67)      | 1.16 (0.79-1.70)      |
|                                          | Pregabalin    | 3.2       | 0.92 (0.29-2.93)      | 96.8           | 0.67 (0.54-0.82)      | 0.67 (0.55-0.83)      |
|                                          | Topiramate    | 6         | 0.71 (0.10-5.32)      | 94             | 0.80 (0.48-1.33)      | 0.80 (0.49-1.30)      |
|                                          | Valproate     | 4.5       | 1.48 (0.71-3.07)      | 95.5           | 1.18 (1.01-1.39)      | 1.20 (1.02-1.40)      |
|                                          | Other         | 2         | 1.05 (0.14-7.77)      | 98             | 0.94 (0.71-1.26)      | 0.95 (0.71-1.25)      |
|                                          | Polytherapy   | 6.2       | 1.13 (0.52-2.45)      | 93.8           | 1.12 (0.92-1.37)      | 1.12 (0.92-1.36)      |

Table S7 – Heterogeneity Tests: Wald tests of hazard ratio comparisons

| Outcome                                  | ASM           | Wald test of heterogeneity                    |                      |                                                          |                      |                                                       |                      |                                    |                      |                             |                      |
|------------------------------------------|---------------|-----------------------------------------------|----------------------|----------------------------------------------------------|----------------------|-------------------------------------------------------|----------------------|------------------------------------|----------------------|-----------------------------|----------------------|
|                                          |               | CPRD versus DOHaD<br>primary analysis results |                      | Primary analysis<br>versus sibling<br>comparison results |                      | Primary analysis versus indication restricted results |                      |                                    |                      |                             |                      |
|                                          |               |                                               |                      |                                                          |                      | Primary analysis vs<br>epilepsy                       |                      | Primary analysis vs<br>psychiatric |                      | Primary analysis vs somatic |                      |
|                                          |               | Wald statistic <sup>a</sup>                   | P value <sup>b</sup> | Wald statistic <sup>a</sup>                              | P value <sup>b</sup> | Wald statistic <sup>a</sup>                           | P value <sup>b</sup> | Wald statistic <sup>a</sup>        | P value <sup>b</sup> | Wald statistic <sup>a</sup> | P value <sup>b</sup> |
| Autism                                   | No ASM        | -                                             | -                    | -                                                        | -                    | -                                                     | -                    | -                                  | -                    | -                           | -                    |
|                                          | Carbamazepine | 0.842                                         | 0.35889              | 0.000                                                    | 0.98563              | 0.036                                                 | 0.84883              | 0.257                              | 0.61188              | 0.521                       | 0.47037              |
|                                          | Gabapentin    | 1.343                                         | 0.24652              | 1.361                                                    | 0.24344              | 0.036                                                 | 0.85008              | 0.073                              | 0.78720              | 0.131                       | 0.71748              |
|                                          | Lamotrigine   | 1.124                                         | 0.28914              | 0.005                                                    | 0.94264              | 0.003                                                 | 0.95974              | 1.664                              | 0.19701              | 0.014                       | 0.90470              |
|                                          | Levetiracetam | 0.017                                         | 0.89497              | 0.369                                                    | 0.54349              | 0.086                                                 | 0.76906              | 0.298                              | 0.58492              | -                           | -                    |
|                                          | Phenytoin     | 0.039                                         | 0.84441              | 15.696                                                   | <b>0.00007</b>       | 0.120                                                 | 0.72924              | 1.189                              | 0.27550              | 0.050                       | 0.82298              |
|                                          | Pregabalin    | 0.089                                         | 0.76597              | 0.644                                                    | 0.42230              | -                                                     | -                    | 0.630                              | 0.42738              | 0.245                       | 0.62082              |
|                                          | Topiramate    | 1.832                                         | 0.17588              | 0.092                                                    | 0.76209              | 2.214                                                 | 0.13676              | 0.125                              | 0.72396              | 0.036                       | 0.84875              |
|                                          | Valproate     | 0.378                                         | 0.53874              | 3.821                                                    | <b>0.05062</b>       | 0.817                                                 | 0.36602              | 0.401                              | 0.52662              | 0.288                       | 0.59159              |
|                                          | Other         | 0.163                                         | 0.68614              | 0.007                                                    | 0.93123              | 0.234                                                 | 0.62887              | 0.108                              | 0.74265              | 0.251                       | 0.61633              |
|                                          | Polytherapy   | 0.011                                         | 0.91465              | 0.269                                                    | 0.60414              | 1.868                                                 | 0.17172              | 0.057                              | 0.81054              | 0.821                       | 0.36477              |
| Intellectual disability                  | No ASM        | -                                             | -                    | -                                                        | -                    | -                                                     | -                    | -                                  | -                    | -                           | -                    |
|                                          | Carbamazepine | 0.225                                         | 0.63563              | 1.100                                                    | 0.29420              | 0.305                                                 | 0.58061              | 2.019                              | 0.15533              | 1.190                       | 0.27535              |
|                                          | Gabapentin    | -                                             | -                    | 0.672                                                    | 0.41245              | -                                                     | -                    | 0.000                              | 0.98327              | 0.010                       | 0.91945              |
|                                          | Lamotrigine   | 0.454                                         | 0.50050              | 0.025                                                    | 0.87393              | 0.260                                                 | 0.60982              | 0.194                              | 0.65999              | 1.494                       | 0.22163              |
|                                          | Levetiracetam | -                                             | -                    | 0.004                                                    | 0.95148              | 0.141                                                 | 0.70702              | -                                  | -                    | -                           | -                    |
|                                          | Phenytoin     | -                                             | -                    | 0.025                                                    | 0.87448              | 0.010                                                 | 0.92024              | -                                  | -                    | 0.364                       | 0.54628              |
|                                          | Pregabalin    | -                                             | -                    | 0.033                                                    | 0.85621              | -                                                     | -                    | 0.275                              | 0.60007              | 0.001                       | 0.97895              |
|                                          | Topiramate    | 0.058                                         | 0.80965              | 0.499                                                    | 0.48001              | 2.063                                                 | 0.15092              | 0.266                              | 0.60627              | 0.076                       | 0.78241              |
|                                          | Valproate     | 1.582                                         | 0.20850              | 1.704                                                    | 0.19181              | 0.101                                                 | 0.75028              | 2.171                              | 0.14064              | 1.008                       | 0.31534              |
|                                          | Other         | -                                             | -                    | 0.248                                                    | 0.61842              | 0.099                                                 | 0.75258              | 0.395                              | 0.52956              | 0.004                       | 0.94727              |
|                                          | Polytherapy   | 0.006                                         | 0.93956              | 2.410                                                    | 0.12055              | 1.339                                                 | 0.24715              | 1.688                              | 0.19380              | 0.001                       | 0.97810              |
| Attention Deficit Hyperactivity Disorder | No ASM        | -                                             | -                    | -                                                        | -                    | -                                                     | -                    | -                                  | -                    | -                           | -                    |
|                                          | Carbamazepine | 1.577                                         | 0.20916              | 0.254                                                    | 0.61428              | 0.046                                                 | 0.82931              | 0.010                              | 0.92007              | 0.292                       | 0.58872              |
|                                          | Gabapentin    | 1.485                                         | 0.22294              | 0.066                                                    | 0.79761              | 0.356                                                 | 0.55049              | 0.010                              | 0.91917              | 1.242                       | 0.26511              |
|                                          | Lamotrigine   | 4.739                                         | <b>0.02949</b>       | 0.081                                                    | 0.77621              | 0.036                                                 | 0.85039              | 1.383                              | 0.23967              | 0.114                       | 0.73516              |
|                                          | Levetiracetam | 0.179                                         | 0.67182              | 0.391                                                    | 0.53165              | 0.017                                                 | 0.89512              | 0.204                              | 0.65123              | 5.920                       | <b>0.01497</b>       |
|                                          | Phenytoin     | 0.389                                         | 0.53298              | 15.681                                                   | <b>0.00007</b>       | 0.004                                                 | 0.94752              | 0.282                              | 0.59527              | 0.363                       | 0.54701              |
|                                          | Pregabalin    | 0.285                                         | 0.59315              | 4.503                                                    | <b>0.03383</b>       | 28.684                                                | <b>&lt;0.00001</b>   | 0.213                              | 0.64435              | 2.345                       | 0.12570              |
|                                          | Topiramate    | 0.013                                         | 0.91091              | 1.100                                                    | 0.29433              | 0.177                                                 | 0.67413              | 0.002                              | 0.96610              | 0.149                       | 0.69976              |
|                                          | Valproate     | 0.345                                         | 0.55691              | 0.997                                                    | 0.31793              | 0.027                                                 | 0.87008              | 0.453                              | 0.50081              | 4.670                       | <b>0.03070</b>       |

|  |             |       |         |       |                |       |         |       |         |       |         |
|--|-------------|-------|---------|-------|----------------|-------|---------|-------|---------|-------|---------|
|  | Other       | 0.010 | 0.91906 | 5.810 | <b>0.01593</b> | 0.386 | 0.53424 | 0.243 | 0.62178 | 0.667 | 0.41407 |
|  | Polytherapy | 0.000 | 0.99018 | 3.128 | <b>0.07698</b> | 0.032 | 0.85903 | 0.089 | 0.76549 | 0.323 | 0.56966 |

<sup>a</sup> – Wald statistic calculated on the log hazard ratio scale as  $\frac{(\log(HR_1) - \log(HR_2))^2}{V_1 + V_2}$  where  $V_i$  is the square of the standard error for  $\log(HR_i)$ . Note that this assumes that there is no covariance between  $HR_1$  and  $HR_2$  which would inflate the Wald statistic value if covariance in estimates were to be positive (as would be expected). P-values are therefore conservative.

<sup>b</sup> – Wald statistic compared to the  $\chi^2$  distribution with 1 degree of freedom. By default, the p-value is a 2-sided test.

**Table S8 – Discordant Sibling Analysis: Country specific and combined results**

| Outcome                                  | ASM           | CPRD (UK) |                       | DOHaD (Sweden) |                       | Combined              |
|------------------------------------------|---------------|-----------|-----------------------|----------------|-----------------------|-----------------------|
|                                          |               | Weighting | Adjusted HR (95 % CI) | Weighting      | Adjusted HR (95 % CI) | Adjusted HR (95 % CI) |
| Autism                                   | No ASM        | -         | 1 (Reference)         | -              | 1 (Reference)         | 1 (Reference)         |
|                                          | Carbamazepine | 21.5      | 1.79 (0.66-4.79)      | 78.5           | 1.13 (0.68-1.90)      | 1.25 (0.79-1.98)      |
|                                          | Gabapentin    | 52.6      | 0.97 (0.41-2.25)      | 47.4           | 0.59 (0.24-1.43)      | 0.76 (0.41-1.41)      |
|                                          | Lamotrigine   | 22        | 1.21 (0.55-2.68)      | 78             | 0.76 (0.50-1.16)      | 0.84 (0.58-1.23)      |
|                                          | Levetiracetam | 50.9      | 0.59 (0.12-3.01)      | 49.1           | 0.50 (0.10-2.62)      | 0.55 (0.17-1.74)      |
|                                          | Phenytoin     | 73        | 15.33 (4.45-52.85)    | 27             | 5.34 (0.70-40.88)     | 11.53 (4.00-33.20)    |
|                                          | Pregabalin    | 37.9      | 0.54 (0.23-1.28)      | 62.1           | 1.24 (0.63-2.42)      | 0.91 (0.54-1.54)      |
|                                          | Topiramate    | 19.6      | 0.31 (0.03-3.01)      | 80.4           | 1.95 (0.64-5.98)      | 1.36 (0.50-3.72)      |
|                                          | Valproate     | 22.3      | 0.81 (0.28-2.31)      | 77.7           | 1.13 (0.65-1.99)      | 1.05 (0.64-1.72)      |
|                                          | Other         | 36.2      | 1.64 (0.42-6.39)      | 63.8           | 1.08 (0.39-3.01)      | 1.25 (0.55-2.85)      |
|                                          | Polytherapy   | 32.1      | 1.12 (0.43-2.93)      | 67.9           | 1.39 (0.72-2.70)      | 1.30 (0.75-2.24)      |
| Intellectual disability                  | No ASM        | -         | 1 (Reference)         | -              | 1 (Reference)         | 1 (Reference)         |
|                                          | Carbamazepine | 37.7      | 8.21 (3.14-21.44)     | 62.3           | 0.74 (0.35-1.57)      | 1.84 (1.02-3.32)      |
|                                          | Gabapentin    | -         | -                     | 100            | 1.91 (0.52-7.03)      | 1.91 (0.52-7.03)      |
|                                          | Lamotrigine   | 15        | 2.42 (0.46-12.72)     | 85             | 1.04 (0.52-2.10)      | 1.19 (0.62-2.25)      |
|                                          | Levetiracetam | -         | -                     | 100            | 0.71 (0.08-6.47)      | 0.71 (0.08-6.47)      |
|                                          | Phenytoin     | -         | -                     | 100            | 0.53 (0.03-8.50)      | 0.53 (0.03-8.50)      |
|                                          | Pregabalin    | -         | -                     | 100            | 0.77 (0.26-2.26)      | 0.77 (0.26-2.26)      |
|                                          | Topiramate    | 33.8      | 1.35 (0.14-12.70)     | 66.2           | 1.51 (0.30-7.50)      | 1.45 (0.40-5.36)      |
|                                          | Valproate     | 18.5      | 0.30 (0.06-1.59)      | 81.5           | 2.23 (1.01-4.92)      | 1.54 (0.76-3.14)      |
|                                          | Other         | -         | -                     | 100            | 0.57 (0.11-3.00)      | 0.57 (0.11-3.00)      |
|                                          | Polytherapy   | 11.3      | 1.24 (0.10-15.12)     | 88.7           | 0.97 (0.40-2.36)      | 1.00 (0.43-2.31)      |
| Attention Deficit Hyperactivity Disorder | No ASM        | -         | 1 (Reference)         | -              | 1 (Reference)         | 1 (Reference)         |
|                                          | Carbamazepine | 8.1       | 0.86 (0.26-2.91)      | 91.9           | 0.98 (0.68-1.41)      | 0.97 (0.69-1.37)      |
|                                          | Gabapentin    | 17.3      | 3.44 (0.96-12.35)     | 82.7           | 0.90 (0.50-1.61)      | 1.13 (0.67-1.92)      |
|                                          | Lamotrigine   | 5.4       | 5.97 (1.69-21.11)     | 94.6           | 0.76 (0.56-1.03)      | 0.85 (0.63-1.14)      |
|                                          | Levetiracetam | 27.5      | 4.06 (0.52-31.68)     | 72.5           | 1.06 (0.30-3.77)      | 1.54 (0.52-4.51)      |
|                                          | Phenytoin     | 45.3      | 38.49 (9.14-162.11)   | 54.7           | 2.98 (0.81-11.01)     | 9.48 (3.60-24.95)     |
|                                          | Pregabalin    | 7.5       | 1.62 (0.38-7.03)      | 92.5           | 1.06 (0.70-1.62)      | 1.10 (0.74-1.64)      |
|                                          | Topiramate    | 14.3      | 0.25 (0.02-2.67)      | 85.7           | 0.51 (0.19-1.35)      | 0.46 (0.19-1.13)      |
|                                          | Valproate     | 15        | 4.00 (1.39-11.47)     | 85             | 1.26 (0.81-1.96)      | 1.49 (0.99-2.25)      |
|                                          | Other         | 18.6      | 8.83 (1.69-46.00)     | 81.4           | 1.81 (0.82-3.98)      | 2.43 (1.19-4.95)      |
|                                          | Polytherapy   | 21.7      | 4.04 (1.51-10.85)     | 78.3           | 1.39 (0.83-2.35)      | 1.76 (1.11-2.78)      |

Table S9 – Active Comparator Analysis: Country specific and combined results

| Outcome                                  | ASM           | CPRD (UK) |                       | DOHaD (Sweden) |                       | Combined              |
|------------------------------------------|---------------|-----------|-----------------------|----------------|-----------------------|-----------------------|
|                                          |               | Weighting | Adjusted HR (95 % CI) | Weighting      | Adjusted HR (95 % CI) | Adjusted HR (95 % CI) |
| Autism                                   | Lamotrigine   | -         | 1 (Reference)         | -              | 1 (Reference)         | 1 (Reference)         |
|                                          | No ASM        | 11.9      | 0.91 (0.56-1.48)      | 88.1           | 1.21 (1.01-1.44)      | 1.17 (0.99-1.38)      |
|                                          | Carbamazepine | 12.0      | 1.41 (0.73-2.71)      | 88.0           | 1.46 (1.14-1.86)      | 1.45 (1.16-1.82)      |
|                                          | Gabapentin    | 31.3      | 1.30 (0.66-2.58)      | 68.7           | 1.18 (0.74-1.87)      | 1.21 (0.83-1.78)      |
|                                          | Levetiracetam | 20.5      | 0.82 (0.20-3.34)      | 79.5           | 0.97 (0.47-1.99)      | 0.94 (0.50-1.77)      |
|                                          | Phenytoin     | 9.8       | 1.09 (0.15-7.66)      | 90.2           | 1.18 (0.62-2.24)      | 1.17 (0.63-2.15)      |
|                                          | Pregabalin    | 12.5      | 0.72 (0.30-1.76)      | 87.5           | 0.85 (0.60-1.18)      | 0.83 (0.61-1.13)      |
|                                          | Topiramate    | 7.2       | 0.28 (0.04-2.15)      | 92.8           | 1.52 (0.86-2.69)      | 1.35 (0.78-2.33)      |
|                                          | Valproate     | 11.9      | 1.38 (0.69-2.74)      | 88.1           | 2.19 (1.70-2.82)      | 2.07 (1.63-2.63)      |
|                                          | Other         | 9.6       | 1.49 (0.44-5.03)      | 90.4           | 1.54 (1.04-2.29)      | 1.53 (1.05-2.24)      |
|                                          | Polytherapy   | 16.7      | 1.42 (0.75-2.68)      | 83.3           | 1.82 (1.36-2.42)      | 1.74 (1.34-2.26)      |
| Intellectual disability                  | Lamotrigine   | -         | 1 (Reference)         | -              | 1 (Reference)         | 1 (Reference)         |
|                                          | No ASM        | 6.6       | 0.64 (0.23-1.77)      | 93.4           | 0.91 (0.70-1.20)      | 0.89 (0.69-1.16)      |
|                                          | Carbamazepine | 6.4       | 1.06 (0.27-4.16)      | 93.6           | 1.17 (0.82-1.68)      | 1.17 (0.83-1.65)      |
|                                          | Gabapentin    | -         | -                     | 100            | 0.93 (0.43-2.05)      | 0.93 (0.43-2.05)      |
|                                          | Levetiracetam | -         | -                     | 100            | 0.60 (0.19-1.92)      | 0.60 (0.19-1.92)      |
|                                          | Phenytoin     | -         | -                     | 100            | 0.61 (0.19-1.96)      | 0.61 (0.19-1.96)      |
|                                          | Pregabalin    | -         | -                     | 100            | 0.78 (0.45-1.37)      | 0.78 (0.45-1.37)      |
|                                          | Topiramate    | 11.7      | 1.98 (0.23-17.02)     | 88.3           | 2.19 (1.00-4.81)      | 2.17 (1.04-4.53)      |
|                                          | Valproate     | 4.3       | 0.66 (0.12-3.51)      | 95.7           | 2.41 (1.69-3.44)      | 2.28 (1.61-3.22)      |
|                                          | Other         | -         | -                     | 100            | 0.83 (0.39-1.73)      | 0.83 (0.39-1.73)      |
|                                          | Polytherapy   | 7.9       | 1.24 (0.32-4.74)      | 92.1           | 1.86 (1.25-2.75)      | 1.80 (1.23-2.62)      |
| Attention Deficit Hyperactivity Disorder | Lamotrigine   | -         | 1 (Reference)         | -              | 1 (Reference)         | 1 (Reference)         |
|                                          | Carbamazepine | 5.2       | 0.61 (0.35-1.07)      | 94.8           | 1.16 (1.02-1.33)      | 1.12 (0.99-1.28)      |
|                                          | Gabapentin    | 5.2       | 0.92 (0.43-1.96)      | 94.8           | 1.22 (1.02-1.45)      | 1.20 (1.01-1.42)      |
|                                          | No ASM        | 13.4      | 1.08 (0.46-2.56)      | 86.6           | 1.31 (0.93-1.84)      | 1.27 (0.93-1.75)      |
|                                          | Levetiracetam | 8.9       | 0.90 (0.16-5.10)      | 91.1           | 1.18 (0.69-2.02)      | 1.15 (0.69-1.93)      |
|                                          | Phenytoin     | 3.9       | 1.31 (0.17-9.91)      | 96.1           | 1.32 (0.88-1.97)      | 1.32 (0.88-1.96)      |
|                                          | Pregabalin    | 3.5       | 0.56 (0.15-2.06)      | 96.5           | 0.77 (0.61-0.99)      | 0.77 (0.60-0.98)      |
|                                          | Topiramate    | 6.0       | 0.43 (0.06-3.43)      | 94.0           | 0.93 (0.55-1.57)      | 0.89 (0.54-1.48)      |
|                                          | Valproate     | 5.0       | 0.90 (0.38-2.15)      | 95.0           | 1.38 (1.13-1.68)      | 1.35 (1.11-1.63)      |
|                                          | Other         | 2.2       | 0.64 (0.08-5.00)      | 97.8           | 1.10 (0.80-1.50)      | 1.08 (0.80-1.47)      |
|                                          | Polytherapy   | 6.0       | 0.69 (0.27-1.72)      | 94.0           | 1.30 (1.03-1.64)      | 1.25 (1.00-1.57)      |



**Table S10 – Indication Stratified Analysis:** Counts of exposed and exposed with each outcome in each country according to indication

| Outcome                                  | ASM           | CPRD (UK) |                                     |             |                                     |           |                                     | DOHaD (Sweden) |                                     |             |                                     |           |                                     |
|------------------------------------------|---------------|-----------|-------------------------------------|-------------|-------------------------------------|-----------|-------------------------------------|----------------|-------------------------------------|-------------|-------------------------------------|-----------|-------------------------------------|
|                                          |               | Epilepsy  |                                     | Psychiatric |                                     | Somatic   |                                     | Epilepsy       |                                     | Psychiatric |                                     | Somatic   |                                     |
|                                          |               | N exposed | N exposed with outcome <sup>a</sup> | N exposed   | N exposed with outcome <sup>a</sup> | N exposed | N exposed with outcome <sup>a</sup> | N exposed      | N exposed with outcome <sup>a</sup> | N exposed   | N exposed with outcome <sup>a</sup> | N exposed | N exposed with outcome <sup>a</sup> |
| Autism                                   | No ASM        | 4075      | 78                                  | 183,004     | 3701                                | 69,091    | 1195                                | 10,769         | 425                                 | 189,904     | 6058                                | 244,909   | 5582                                |
|                                          | Carbamazepine | 460       | 17                                  | 290         | 11                                  | 132       | 5                                   | 1842           | 98                                  | 317         | 29                                  | 335       | 24                                  |
|                                          | Gabapentin    | 18        | <5                                  | 499         | 15                                  | 279       | 11                                  | 43             | <5                                  | 359         | 7                                   | 487       | 9                                   |
|                                          | Lamotrigine   | 791       | 17                                  | 469         | 11                                  | 180       | 7                                   | 2383           | 53                                  | 2832        | 84                                  | 1171      | 32                                  |
|                                          | Levetiracetam | 174       | <5                                  | 100         | 0                                   | 27        | 0                                   | 556            | 8                                   | 124         | <5                                  | 147       | 0                                   |
|                                          | Phenytoin     | 45        | <5                                  | 18          | <5                                  | 7         | 0                                   | 147            | 7                                   | 12          | 0                                   | 16        | <5                                  |
|                                          | Pregabalin    | 9         | 0                                   | 380         | 6                                   | 192       | <5                                  | 45             | 0                                   | 928         | 34                                  | 594       | 20                                  |
|                                          | Topiramate    | 43        | <5                                  | 115         | 0                                   | 108       | 0                                   | 71             | 6                                   | 149         | 6                                   | 119       | <5                                  |
|                                          | Valproate     | 354       | 11                                  | 218         | 11                                  | 90        | 6                                   | 792            | 82                                  | 275         | 26                                  | 157       | 13                                  |
|                                          | Other         | 34        | 0                                   | 61          | <5                                  | 23        | <5                                  | 225            | 14                                  | 165         | 15                                  | 115       | 9                                   |
|                                          | Polytherapy   | 505       | 16                                  | 315         | 14                                  | 150       | 7                                   | 912            | 63                                  | 419         | 28                                  | 294       | 16                                  |
| Intellectual disability                  | No ASM        | 4075      | 13                                  | 183,004     | 447                                 | 69,091    | 165                                 | 10,769         | 194                                 | 189,904     | 1912                                | 244,909   | 1182                                |
|                                          | Carbamazepine | 460       | <5                                  | 290         | <5                                  | 132       | 0                                   | 1842           | 56                                  | 317         | 7                                   | 335       | 13                                  |
|                                          | Gabapentin    | 18        | 0                                   | 499         | 0                                   | 279       | 0                                   | 43             | 0                                   | 359         | <5                                  | 487       | <5                                  |
|                                          | Lamotrigine   | 791       | <5                                  | 469         | <5                                  | 180       | <5                                  | 2383           | 34                                  | 2832        | 31                                  | 1171      | 17                                  |
|                                          | Levetiracetam | 174       | 0                                   | 100         | 0                                   | 27        | 0                                   | 556            | <5                                  | 124         | 0                                   | 147       | 0                                   |
|                                          | Phenytoin     | 45        | 0                                   | 18          | 0                                   | 7         | 0                                   | 147            | <5                                  | 12          | 0                                   | 16        | <5                                  |
|                                          | Pregabalin    | 9         | 0                                   | 380         | 0                                   | 192       | 0                                   | 45             | 0                                   | 928         | 13                                  | 594       | 7                                   |
|                                          | Topiramate    | 43        | 0                                   | 115         | <5                                  | 108       | <5                                  | 71             | 5                                   | 149         | <5                                  | 119       | <5                                  |
|                                          | Valproate     | 354       | <5                                  | 218         | <5                                  | 90        | 0                                   | 792            | 51                                  | 275         | 9                                   | 157       | 6                                   |
|                                          | Other         | 34        | 0                                   | 61          | 0                                   | 23        | 0                                   | 225            | 5                                   | 165         | <5                                  | 115       | <5                                  |
|                                          | Polytherapy   | 505       | <5                                  | 315         | <5                                  | 150       | <5                                  | 912            | 40                                  | 419         | 8                                   | 294       | 9                                   |
| Attention Deficit Hyperactivity Disorder | No ASM        | 4075      | 38                                  | 183,004     | 2385                                | 69,091    | 797                                 | 10,769         | 929                                 | 189,904     | 11,585                              | 244,909   | 11,466                              |
|                                          | Carbamazepine | 460       | 11                                  | 290         | 11                                  | 132       | <5                                  | 1842           | 190                                 | 317         | 39                                  | 335       | 33                                  |
|                                          | Gabapentin    | 18        | 0                                   | 499         | 9                                   | 279       | 7                                   | 43             | 5                                   | 359         | 12                                  | 487       | 22                                  |
|                                          | Lamotrigine   | 791       | 14                                  | 469         | 6                                   | 180       | <5                                  | 2383           | 109                                 | 2832        | 140                                 | 1171      | 48                                  |
|                                          | Levetiracetam | 174       | <5                                  | 100         | <5                                  | 27        | <5                                  | 556            | 14                                  | 124         | <5                                  | 147       | <5                                  |
|                                          | Phenytoin     | 45        | <5                                  | 18          | <5                                  | 7         | 0                                   | 147            | 23                                  | 12          | <5                                  | 16        | <5                                  |
|                                          | Pregabalin    | 9         | <5                                  | 380         | <5                                  | 192       | <5                                  | 45             | 0                                   | 928         | 58                                  | 594       | 43                                  |
|                                          | Topiramate    | 43        | 0                                   | 115         | <5                                  | 108       | <5                                  | 71             | <5                                  | 149         | 8                                   | 119       | 7                                   |

| Outcome | ASM         | CPRD (UK) |                                     |             |                                     |           |                                     | DOHaD (Sweden) |                                     |             |                                     |           |                                     |
|---------|-------------|-----------|-------------------------------------|-------------|-------------------------------------|-----------|-------------------------------------|----------------|-------------------------------------|-------------|-------------------------------------|-----------|-------------------------------------|
|         |             | Epilepsy  |                                     | Psychiatric |                                     | Somatic   |                                     | Epilepsy       |                                     | Psychiatric |                                     | Somatic   |                                     |
|         |             | N exposed | N exposed with outcome <sup>a</sup> | N exposed   | N exposed with outcome <sup>a</sup> | N exposed | N exposed with outcome <sup>a</sup> | N exposed      | N exposed with outcome <sup>a</sup> | N exposed   | N exposed with outcome <sup>a</sup> | N exposed | N exposed with outcome <sup>a</sup> |
|         | Valproate   | 354       | 8                                   | 218         | 6                                   | 90        | <5                                  | 792            | 113                                 | 275         | 39                                  | 157       | 14                                  |
|         | Other       | 34        | 0                                   | 61          | <5                                  | 23        | 0                                   | 225            | 24                                  | 165         | 22                                  | 115       | 15                                  |
|         | Polytherapy | 505       | 7                                   | 315         | 5                                   | 150       | <5                                  | 912            | 78                                  | 419         | 42                                  | 294       | 24                                  |

<sup>a</sup> Number with outcome at the end of follow up

**Table S11 – Indication Stratified Analysis: Country specific adjusted marginal risk results**

| Outcome                                  | ASM           | CPRD (UK)                                             |                    |                    | DOHaD (Sweden)                                        |                     |                    |
|------------------------------------------|---------------|-------------------------------------------------------|--------------------|--------------------|-------------------------------------------------------|---------------------|--------------------|
|                                          |               | Risk as % (95% CI) at age 12 stratified by indication |                    |                    | Risk as % (95% CI) at age 12 stratified by indication |                     |                    |
|                                          |               | Epilepsy                                              | Psychiatric        | Somatic            | Epilepsy                                              | Psychiatric         | Somatic            |
| Autism                                   | No ASM        | 5.93 (4.18-8.40)                                      | 5.99 (5.65-6.36)   | 6.08 (5.46-6.77)   | 4.92 (4.32-5.61)                                      | 6.39 (5.85-6.98)    | 5.11 (4.62-5.65)   |
|                                          | Carbamazepine | 10.02 (5.87-17.10)                                    | 8.07 (4.51-14.42)  | 8.08 (2.92-22.39)  | 6.03 (4.84-7.52)                                      | 8.60 (5.98-12.37)   | 7.36 (4.88-11.09)  |
|                                          | Gabapentin    | 12.81 (1.55-105.59)                                   | 8.54 (5.37-13.58)  | 10.65 (6.30-18.00) | 3.30 (0.50-21.69)                                     | 5.59 (2.74-11.40)   | 4.12 (2.18-7.76)   |
|                                          | Lamotrigine   | 6.82 (4.04-11.54)                                     | 6.84 (3.79-12.35)  | 8.13 (3.49-18.97)  | 4.48 (3.41-5.88)                                      | 6.45 (5.16-8.06)    | 4.21 (2.93-6.06)   |
|                                          | Levetiracetam | 6.19 (1.51-25.46)                                     | -                  | -                  | 5.02 (2.60-9.71)                                      | 7.50 (2.55-22.06)   | -                  |
|                                          | Phenytoin     | 7.59 (1.26-45.72)                                     | 16.19 (3.22-81.27) | -                  | 4.33 (2.11-8.91)                                      | -                   | 5.98 (1.58-22.63)  |
|                                          | Pregabalin    | -                                                     | 4.58 (2.11-9.98)   | 5.42 (2.11-13.95)  | -                                                     | 5.54 (3.97-7.75)    | 4.08 (2.64-6.31)   |
|                                          | Topiramate    | 4.49 (0.63-32.14)                                     | -                  | -                  | 13.31 (6.63-26.73)                                    | 6.17 (2.87-13.28)   | 5.22 (2.05-13.29)  |
|                                          | Valproate     | 8.73 (4.73-16.12)                                     | 11.16 (6.30-19.75) | 12.98 (6.23-27.05) | 10.34 (8.27-12.91)                                    | 9.07 (6.26-13.14)   | 6.55 (3.86-11.13)  |
|                                          | Other         | -                                                     | 8.00 (2.11-30.39)  | 12.08 (2.03-71.95) | 7.82 (4.79-12.77)                                     | 9.08 (5.62-14.66)   | 7.54 (4.05-14.02)  |
|                                          | Polytherapy   | 9.14 (5.47-15.26)                                     | 10.39 (6.22-17.36) | 8.27 (3.87-17.69)  | 9.62 (7.55-12.27)                                     | 9.32 (6.47-13.42)   | 5.81 (3.55-9.49)   |
| Intellectual disability                  | No ASM        | 0.71 (0.34-1.47)                                      | 0.60 (0.51-0.70)   | 0.66 (0.50-0.88)   | 2.01 (1.70-2.38)                                      | 1.45 (1.33-1.58)    | 1.22 (1.11-1.34)   |
|                                          | Carbamazepine | 1.41 (0.43-4.66)                                      | 0.42 (0.06-3.01)   | -                  | 3.43 (2.56-4.60)                                      | 1.11 (0.52-2.38)    | 2.27 (1.26-4.11)   |
|                                          | Gabapentin    | -                                                     | -                  | -                  | -                                                     | 1.51 (0.49-4.64)    | 1.33 (0.50-3.53)   |
|                                          | Lamotrigine   | 1.37 (0.42-4.50)                                      | 0.84 (0.20-3.55)   | 3.03 (0.77-11.94)  | 2.95 (2.08-4.17)                                      | 1.78 (1.23-2.56)    | 1.65 (0.98-2.77)   |
|                                          | Levetiracetam | -                                                     | -                  | -                  | 2.24 (0.74-6.83)                                      | -                   | -                  |
|                                          | Phenytoin     | -                                                     | -                  | -                  | 1.84 (0.60-5.67)                                      | -                   | 1.67 (0.23-11.91)  |
|                                          | Pregabalin    | -                                                     | -                  | -                  | -                                                     | 1.52 (0.88-2.63)    | 1.07 (0.50-2.25)   |
|                                          | Topiramate    | -                                                     | 2.46 (0.35-17.07)  | 3.18 (0.47-21.56)  | 12.50 (5.72-27.29)                                    | 1.65 (0.42-6.51)    | 1.02 (0.15-7.12)   |
|                                          | Valproate     | 1.13 (0.25-5.11)                                      | 1.05 (0.26-4.27)   | -                  | 6.28 (4.69-8.40)                                      | 2.19 (1.13-4.24)    | 1.99 (0.88-4.51)   |
|                                          | Other         | -                                                     | -                  | -                  | 2.69 (1.14-6.37)                                      | 0.80 (0.20-3.21)    | 1.05 (0.26-4.21)   |
|                                          | Polytherapy   | 2.11 (0.73-6.09)                                      | 1.29 (0.43-3.87)   | 2.79 (0.83-9.46)   | 5.82 (4.23-8.00)                                      | 1.51 (0.74-3.08)    | 1.91 (0.96-3.81)   |
| Attention Deficit Hyperactivity Disorder | No ASM        | 2.82 (1.84-4.32)                                      | 3.25 (3.00-3.51)   | 3.01 (2.64-3.44)   | 11.44 (10.45-12.53)                                   | 13.22 (10.73-16.27) | 11.12 (8.48-14.59) |
|                                          | Carbamazepine | 6.85 (3.65-12.83)                                     | 5.85 (3.34-10.23)  | 3.21 (0.79-13.07)  | 11.28 (9.70-13.12)                                    | 11.88 (8.31-16.97)  | 10.70 (7.05-16.23) |
|                                          | Gabapentin    | -                                                     | 5.91 (3.16-11.05)  | 7.65 (3.86-15.18)  | 16.83 (8.28-34.19)                                    | 12.53 (7.31-21.50)  | 14.39 (9.33-22.19) |
|                                          | Lamotrigine   | 5.46 (2.89-10.32)                                     | 4.00 (1.80-8.90)   | 5.31 (1.69-16.70)  | 9.66 (8.07-11.56)                                     | 13.22 (10.25-17.05) | 9.19 (6.25-13.53)  |
|                                          | Levetiracetam | 4.16 (0.69-25.19)                                     | 6.66 (1.65-26.95)  | 19.24 (8.90-41.58) | 11.16 (7.09-17.58)                                    | 13.94 (5.78-33.63)  | 6.62 (1.79-24.53)  |
|                                          | Phenytoin     | 9.62 (1.71-54.06)                                     | 11.69 (1.91-71.62) | -                  | 12.56 (8.75-18.02)                                    | 13.90 (4.07-47.51)  | 9.12 (3.15-26.42)  |
|                                          | Pregabalin    | 48.15 (25.23-91.90)                                   | 2.20 (0.55-8.82)   | 1.99 (0.26-14.98)  | -                                                     | 10.01 (7.26-13.79)  | 10.16 (6.92-14.92) |
|                                          | Topiramate    | -                                                     | 2.92 (0.41-20.94)  | 3.07 (0.43-21.96)  | 11.38 (4.91-26.38)                                    | 10.49 (5.43-20.29)  | 10.47 (5.17-21.20) |
|                                          | Valproate     | 4.90 (2.08-11.52)                                     | 4.18 (1.68-10.40)  | 4.53 (1.09-18.88)  | 13.15 (11.02-15.68)                                   | 13.66 (9.68-19.28)  | 7.08 (4.01-12.51)  |
|                                          | Other         | -                                                     | 3.89 (0.56-27.08)  | -                  | 12.29 (8.67-17.42)                                    | 13.97 (9.20-21.21)  | 13.07 (7.85-21.76) |
|                                          | Polytherapy   | 4.47 (1.92-10.40)                                     | 3.08 (1.10-8.59)   | 3.29 (0.74-14.56)  | 12.49 (10.21-15.29)                                   | 15.50 (11.12-21.62) | 10.87 (6.90-17.13) |

Table S12 – Indication Stratified Analysis: Pooled adjusted marginal risk at age 12 results

| Outcome                                  | ASM           | Risk as % (95% CI) at age 12 stratified by indication |                    |                    | Weight for DOHaD (Sweden) (%) |             |         |
|------------------------------------------|---------------|-------------------------------------------------------|--------------------|--------------------|-------------------------------|-------------|---------|
|                                          |               | Epilepsy                                              | Psychiatric        | Somatic            | Epilepsy                      | Psychiatric | Somatic |
| Autism                                   | No ASM        | 5.03 (4.45-5.69)                                      | 6.11 (5.82-6.42)   | 5.54 (5.15-5.96)   | 88.3                          | 31          | 53.5    |
|                                          | Carbamazepine | 6.49 (5.29-7.95)                                      | 8.45 (6.20-11.50)  | 7.46 (5.10-10.91)  | 85.7                          | 71.8        | 86      |
|                                          | Gabapentin    | 6.02 (1.48-24.54)                                     | 7.53 (5.10-11.11)  | 7.23 (4.83-10.84)  | 55.6                          | 29.7        | 40.7    |
|                                          | Lamotrigine   | 4.89 (3.84-6.23)                                      | 6.50 (5.27-8.01)   | 4.67 (3.34-6.51)   | 79                            | 87.5        | 84.5    |
|                                          | Levetiracetam | 5.21 (2.87-9.48)                                      | 7.50 (2.55-22.06)  | -                  | 82.2                          | 100         | -       |
|                                          | Phenytoin     | 4.68 (2.40-9.14)                                      | 16.19 (3.22-81.27) | 5.98 (1.58-22.63)  | 86.2                          | 0           | 100     |
|                                          | Pregabalin    | -                                                     | 5.38 (3.96-7.32)   | 4.29 (2.89-6.37)   | -                             | 84.3        | 82.4    |
|                                          | Topiramate    | 11.79 (6.11-22.76)                                    | 6.17 (2.87-13.28)  | 5.22 (2.05-13.29)  | 88.9                          | 100         | 100     |
|                                          | Valproate     | 10.14 (8.22-12.50)                                    | 9.64 (7.07-13.16)  | 8.28 (5.39-12.73)  | 88.5                          | 70.3        | 65.7    |
|                                          | Other         | 7.82 (4.79-12.77)                                     | 8.95 (5.70-14.05)  | 7.93 (4.41-14.25)  | 100                           | 88.6        | 89.2    |
|                                          | Polytherapy   | 9.54 (7.65-11.88)                                     | 9.67 (7.18-13.01)  | 6.44 (4.27-9.74)   | 82                            | 66.5        | 70.6    |
| Intellectual disability                  | No ASM        | 1.91 (1.62-2.25)                                      | 1.19 (1.11-1.29)   | 1.15 (1.05-1.25)   | 95                            | 77.9        | 90.3    |
|                                          | Carbamazepine | 3.27 (2.46-4.34)                                      | 0.98 (0.48-1.99)   | 2.27 (1.26-4.11)   | 94.4                          | 86.9        | 100     |
|                                          | Gabapentin    | -                                                     | 1.51 (0.49-4.64)   | 1.33 (0.50-3.53)   | -                             | 100         | 100     |
|                                          | Lamotrigine   | 2.77 (1.99-3.87)                                      | 1.70 (1.19-2.42)   | 1.78 (1.10-2.88)   | 92.1                          | 93.9        | 87.6    |
|                                          | Levetiracetam | 2.24 (0.74-6.83)                                      | -                  | -                  | 100                           | -           | -       |
|                                          | Phenytoin     | 1.84 (0.60-5.67)                                      | -                  | 1.67 (0.23-11.91)  | 100                           | -           | 100     |
|                                          | Pregabalin    | -                                                     | 1.52 (0.88-2.63)   | 1.07 (0.50-2.25)   | -                             | 100         | 100     |
|                                          | Topiramate    | 12.50 (5.72-27.29)                                    | 1.88 (0.61-5.78)   | 1.82 (0.46-7.11)   | 100                           | 66.6        | 49.1    |
|                                          | Valproate     | 5.90 (4.43-7.86)                                      | 1.92 (1.06-3.48)   | 1.99 (0.88-4.51)   | 96.4                          | 81.9        | 100     |
|                                          | Other         | 2.69 (1.14-6.37)                                      | 0.80 (0.20-3.21)   | 1.05 (0.26-4.21)   | 100                           | 100         | 100     |
|                                          | Polytherapy   | 5.35 (3.94-7.25)                                      | 1.44 (0.79-2.62)   | 2.10 (1.15-3.82)   | 91.7                          | 70.4        | 75.8    |
| Attention Deficit Hyperactivity Disorder | No ASM        | 10.77 (9.85-11.77)                                    | 3.87 (3.60-4.17)   | 3.87 (3.44-4.36)   | 95.7                          | 12.5        | 19.2    |
|                                          | Carbamazepine | 10.98 (9.48-12.72)                                    | 9.68 (7.16-13.08)  | 9.70 (6.51-14.47)  | 94.5                          | 71.1        | 91.9    |
|                                          | Gabapentin    | 16.83 (8.28-34.19)                                    | 9.10 (6.04-13.69)  | 12.02 (8.33-17.33) | 100                           | 57.3        | 71.5    |
|                                          | Lamotrigine   | 9.26 (7.79-11.01)                                     | 11.84 (9.29-15.09) | 8.69 (6.03-12.53)  | 92.7                          | 90.8        | 89.8    |
|                                          | Levetiracetam | 10.52 (6.77-16.34)                                    | 11.30 (5.36-23.81) | 14.62 (7.52-28.41) | 94                            | 71.6        | 25.7    |
|                                          | Phenytoin     | 12.42 (8.72-17.68)                                    | 13.16 (4.76-36.40) | 9.12 (3.15-26.42)  | 95.8                          | 68.5        | 100     |
|                                          | Pregabalin    | 48.15 (25.23-91.90)                                   | 9.27 (6.78-12.67)  | 9.60 (6.58-14.00)  | 0                             | 94.9        | 96.5    |
|                                          | Topiramate    | 11.38 (4.91-26.38)                                    | 9.23 (4.94-17.24)  | 9.10 (4.69-17.69)  | 100                           | 89.9        | 88.6    |
|                                          | Valproate     | 12.63 (10.63-15.01)                                   | 11.79 (8.54-16.27) | 6.66 (3.93-11.30)  | 95.9                          | 87.5        | 86.3    |
|                                          | Other         | 12.29 (8.67-17.42)                                    | 13.20 (8.78-19.86) | 13.07 (7.85-21.76) | 100                           | 95.6        | 100     |
|                                          | Polytherapy   | 11.82 (9.71-14.38)                                    | 13.30 (9.69-18.24) | 9.82 (6.36-15.16)  | 94.6                          | 90.5        | 91.5    |

Table S13 – Sensitivity Analysis: Pooled hazard ratio results

| NDD  | ASM           | Hazard Ratio (95% CI) |                              |                      |                                         | Weighting for Sweden |                              |                      |                                         |
|------|---------------|-----------------------|------------------------------|----------------------|-----------------------------------------|----------------------|------------------------------|----------------------|-----------------------------------------|
|      |               | Primary analysis      | Sensitivity analyses         |                      |                                         | Primary analysis     | Sensitivity analyses         |                      |                                         |
|      |               |                       | Minimum of 4 years follow up | Trimester 1 exposure | 2 prescriptions for exposure definition |                      | Minimum of 4 years follow up | Trimester 1 exposure | 2 prescriptions for exposure definition |
| ASD  | No ASM        | 1 (Reference)         | 1 (Reference)                | 1 (Reference)        | 1 (Reference)                           | -                    | -                            | -                    | -                                       |
|      | Carbamazepine | 1.25 (1.05-1.48)      | 1.26 (1.06-1.49)             | 1.36 (1.04-1.78)     | 1.28 (0.97-1.67)                        | 88.0%                | 88.0%                        | 72.0%                | 73.4%                                   |
|      | Gabapentin    | 1.15 (0.84-1.59)      | 1.20 (0.87-1.66)             | 1.16 (0.80-1.68)     | 1.08 (0.67-1.73)                        | 56.0%                | 56.0%                        | 45.6%                | 45.9%                                   |
|      | Lamotrigine   | 0.86 (0.72-1.01)      | 0.87 (0.74-1.03)             | 0.90 (0.75-1.09)     | 0.85 (0.70-1.03)                        | 88.1%                | 88.0%                        | 85.7%                | 83.7%                                   |
|      | Levetiracetam | 0.82 (0.44-1.54)      | 0.88 (0.47-1.65)             | 1.19 (0.65-2.17)     | 1.00 (0.54-1.88)                        | 80.3%                | 80.4%                        | 82.0%                | 80.4%                                   |
|      | Phenytoin     | 0.99 (0.55-1.80)      | 1.00 (0.55-1.81)             | 1.19 (0.18-8.05)     | 1.25 (0.19-8.45)                        | 90.3%                | 90.3%                        | .                    | .                                       |
|      | Pregabalin    | 0.71 (0.54-0.93)      | 0.69 (0.52-0.91)             | 0.79 (0.60-1.04)     | 0.73 (0.52-1.02)                        | 87.1%                | 92.1%                        | 86.3%                | 83.4%                                   |
|      | Topiramate    | 1.14 (0.68-1.93)      | 1.07 (0.62-1.84)             | 1.38 (0.81-2.33)     | 1.17 (0.58-2.34)                        | 92.9%                | 92.4%                        | 92.9%                | 87.7%                                   |
|      | Valproate     | 1.78 (1.48-2.14)      | 1.79 (1.49-2.15)             | 1.65 (1.24-2.21)     | 1.71 (1.27-2.30)                        | 89.0%                | 89.0%                        | 71.2%                | 75.2%                                   |
|      | Other         | 1.30 (0.93-1.84)      | 1.31 (0.93-1.85)             | 1.37 (0.86-2.18)     | 1.22 (0.75-2.00)                        | 91.0%                | 91.0%                        | 83.5%                | 93.5%                                   |
|      | Polytherapy   | 1.51 (1.22-1.88)      | 1.50 (1.20-1.86)             | 1.51 (1.15-1.98)     | 1.47 (1.19-1.83)                        | 81.2%                | 81.6%                        | 73.0%                | 81.4%                                   |
| ID   | No ASM        | 1 (Reference)         | 1 (Reference)                | 1 (Reference)        | 1 (Reference)                           | -                    | -                            | -                    | -                                       |
|      | Carbamazepine | 1.30 (1.01-1.69)      | 1.30 (1.00-1.69)             | 1.36 (0.87-2.13)     | 1.26 (0.83-1.92)                        | 94.0%                | 94.0%                        | 87.0%                | 88.7%                                   |
|      | Gabapentin    | 1.02 (0.49-2.15)      | 0.76 (0.32-1.83)             | 1.10 (0.46-2.64)     | 0.67 (0.17-2.69)                        | 100.0%               | 100.0%                       | 100.0%               | 100.0%                                  |
|      | Lamotrigine   | 1.12 (0.86-1.46)      | 1.15 (0.88-1.49)             | 1.11 (0.81-1.52)     | 1.01 (0.73-1.38)                        | 93.4%                | 93.4%                        | 90.7%                | 90.6%                                   |
|      | Levetiracetam | 0.66 (0.21-2.05)      | 0.70 (0.22-2.18)             | 1.20 (0.44-3.25)     | 0.75 (0.24-2.35)                        | 100.0%               | 100.0%                       | 100.0%               | 100.0%                                  |
|      | Phenytoin     | 0.67 (0.22-2.10)      | 0.67 (0.21-2.08)             | 2.82 (0.39-20.20)    | 1.81 (0.25-12.91)                       | 100.0%               | 100.0%                       | 100.0%               | 100.0%                                  |
|      | Pregabalin    | 0.86 (0.52-1.40)      | 0.87 (0.53-1.42)             | 0.90 (0.53-1.53)     | 0.59 (0.28-1.24)                        | 100.0%               | 100.0%                       | 100.0%               | 100.0%                                  |
|      | Topiramate    | 2.48 (1.23-4.98)      | 2.52 (1.25-5.06)             | 2.47 (1.17-5.21)     | 3.85 (1.83-8.12)                        | 87.7%                | 87.7%                        | 86.0%                | 100.0%                                  |
|      | Valproate     | 2.56 (1.97-3.32)      | 2.51 (1.93-3.26)             | 2.09 (1.31-3.34)     | 2.45 (1.62-3.71)                        | 96.7%                | 96.6%                        | 94.6%                | 91.8%                                   |
|      | Other         | 0.90 (0.45-1.81)      | 0.90 (0.45-1.81)             | 0.98 (0.37-2.64)     | 0.86 (0.32-2.30)                        | 100.0%               | 100.0%                       | 100.0%               | 100.0%                                  |
|      | Polytherapy   | 2.02 (1.49-2.75)      | 2.04 (1.50-2.77)             | 2.17 (1.45-3.24)     | 1.88 (1.39-2.55)                        | 91.1%                | 91.1%                        | 85.0%                | 91.3%                                   |
| ADHD | No ASM        | 1 (Reference)         | 1 (Reference)                | 1 (Reference)        | 1 (Reference)                           | -                    | -                            | -                    | -                                       |
|      | Carbamazepine | 1.07 (0.94-1.21)      | 1.07 (0.94-1.21)             | 0.97 (0.77-1.24)     | 1.00 (0.79-1.27)                        | 94.6%                | 94.6%                        | 82.7%                | 82.9%                                   |
|      | Gabapentin    | 1.22 (0.92-1.63)      | 1.23 (0.93-1.63)             | 1.27 (0.89-1.82)     | 0.79 (0.47-1.34)                        | 81.5%                | 81.5%                        | 70.4%                | 77.8%                                   |
|      | Lamotrigine   | 0.89 (0.78-1.01)      | 0.89 (0.78-1.01)             | 0.85 (0.73-1.00)     | 0.90 (0.77-1.05)                        | 94.8%                | 94.8%                        | 93.5%                | 92.8%                                   |
|      | Levetiracetam | 1.05 (0.64-1.74)      | 1.06 (0.64-1.75)             | 1.04 (0.58-1.87)     | 1.17 (0.67-2.04)                        | 90.9%                | 90.8%                        | 87.5%                | 88.4%                                   |
|      | Phenytoin     | 1.16 (0.79-1.70)      | 1.16 (0.79-1.70)             | 2.75 (1.14-6.62)     | 1.86 (0.77-4.48)                        | 96.3%                | 96.3%                        | 80.0%                | 80.1%                                   |
|      | Pregabalin    | 0.67 (0.55-0.83)      | 0.67 (0.54-0.82)             | 0.74 (0.60-0.91)     | 0.66 (0.50-0.86)                        | 96.8%                | 97.8%                        | 96.6%                | 96.3%                                   |
|      | Topiramate    | 0.80 (0.49-1.30)      | 0.80 (0.49-1.31)             | 0.96 (0.58-1.56)     | 0.80 (0.40-1.60)                        | 94.0%                | 94.0%                        | 94.0%                | 100.0%                                  |
|      | Valproate     | 1.20 (1.02-1.40)      | 1.20 (1.02-1.40)             | 1.19 (0.92-1.54)     | 1.26 (0.97-1.65)                        | 95.5%                | 95.5%                        | 88.8%                | 89.8%                                   |
|      | Other         | 0.95 (0.71-1.25)      | 0.95 (0.71-1.26)             | 0.98 (0.66-1.46)     | 0.89 (0.59-1.35)                        | 98.0%                | 98.0%                        | 96.1%                | 100.0%                                  |
|      | Polytherapy   | 1.12 (0.92-1.36)      | 1.12 (0.92-1.36)             | 1.09 (0.84-1.42)     | 1.11 (0.92-1.35)                        | 93.8%                | 93.8%                        | 90.0%                | 93.8%                                   |

**Table S14 – Sensitivity Analysis:** Comparison of primary analysis models including and excluding vomiting or antiemetics as a covariate

| Outcome                                  | ASM           | CPRD (UK)         |                   | DOHaD (Sweden)   |                  | Pooled           |                  |
|------------------------------------------|---------------|-------------------|-------------------|------------------|------------------|------------------|------------------|
|                                          |               | Primary           | Sensitivity *     | Primary          | Sensitivity *    | Primary          | Sensitivity *    |
| Autism                                   | No ASM        | 1 (Reference)     | 1 (Reference)     | 1 (Reference)    | 1 (Reference)    | 1 (Reference)    | 1 (Reference)    |
|                                          | Carbamazepine | 1.55 (0.94-2.53)  | 1.53 (0.94-2.51)  | 1.21 (1.01-1.45) | 1.21 (1.01-1.45) | 1.25 (1.05-1.48) | 1.24 (1.05-1.48) |
|                                          | Gabapentin    | 1.43 (0.88-2.32)  | 1.47 (0.91-2.39)  | 0.97 (0.64-1.50) | 0.98 (0.64-1.50) | 1.15 (0.84-1.59) | 1.17 (0.85-1.61) |
|                                          | Lamotrigine   | 1.10 (0.67-1.78)  | 1.09 (0.67-1.78)  | 0.83 (0.69-0.99) | 0.83 (0.69-0.99) | 0.86 (0.72-1.01) | 0.86 (0.72-1.01) |
|                                          | Levetiracetam | 0.90 (0.22-3.67)  | 0.87 (0.21-3.58)  | 0.80 (0.40-1.62) | 0.80 (0.40-1.62) | 0.82 (0.44-1.54) | 0.82 (0.44-1.53) |
|                                          | Phenytoin     | 1.19 (0.18-8.05)  | 1.19 (0.18-8.01)  | 0.97 (0.52-1.82) | 0.98 (0.52-1.82) | 0.99 (0.55-1.80) | 0.99 (0.55-1.80) |
|                                          | Pregabalin    | 0.79 (0.37-1.67)  | 0.81 (0.38-1.71)  | 0.70 (0.53-0.93) | 0.70 (0.53-0.94) | 0.71 (0.54-0.93) | 0.71 (0.55-0.94) |
|                                          | Topiramate    | 0.31 (0.04-2.21)  | 0.31 (0.04-2.26)  | 1.26 (0.73-2.18) | 1.28 (0.74-2.21) | 1.14 (0.68-1.93) | 1.16 (0.68-1.96) |
|                                          | Valproate     | 1.51 (0.87-2.63)  | 1.50 (0.86-2.61)  | 1.82 (1.49-2.21) | 1.82 (1.49-2.21) | 1.78 (1.48-2.14) | 1.78 (1.48-2.14) |
|                                          | Other         | 1.63 (0.52-5.12)  | 1.59 (0.50-4.99)  | 1.28 (0.89-1.83) | 1.28 (0.89-1.83) | 1.30 (0.93-1.84) | 1.30 (0.92-1.84) |
|                                          | Polytherapy   | 1.55 (0.94-2.55)  | 1.55 (0.94-2.56)  | 1.51 (1.19-1.91) | 1.51 (1.19-1.92) | 1.51 (1.22-1.88) | 1.52 (1.22-1.88) |
| Intellectual disability                  | No ASM        | 1 (Reference)     | 1 (Reference)     | 1 (Reference)    | 1 (Reference)    | 1 (Reference)    | 1 (Reference)    |
|                                          | Carbamazepine | 1.67 (0.58-4.85)  | 1.67 (0.58-4.84)  | 1.28 (0.98-1.68) | 1.28 (0.98-1.68) | 1.30 (1.01-1.69) | 1.30 (1.01-1.69) |
|                                          | Gabapentin    | -                 | -                 | 1.02 (0.49-2.15) | 1.02 (0.49-2.15) | 1.02 (0.49-2.15) | 1.02 (0.49-2.15) |
|                                          | Lamotrigine   | 1.57 (0.57-4.38)  | 1.56 (0.56-4.35)  | 1.09 (0.83-1.44) | 1.09 (0.83-1.44) | 1.12 (0.86-1.46) | 1.12 (0.86-1.46) |
|                                          | Levetiracetam | -                 | -                 | 0.66 (0.21-2.05) | 0.66 (0.21-2.05) | 0.66 (0.21-2.05) | 0.66 (0.21-2.05) |
|                                          | Phenytoin     | -                 | -                 | 0.67 (0.22-2.10) | 0.67 (0.22-2.10) | 0.67 (0.22-2.10) | 0.67 (0.22-2.10) |
|                                          | Pregabalin    | -                 | -                 | 0.86 (0.52-1.40) | 0.86 (0.52-1.40) | 0.86 (0.52-1.40) | 0.86 (0.52-1.40) |
|                                          | Topiramate    | 3.12 (0.43-22.82) | 3.18 (0.43-23.49) | 2.40 (1.14-5.06) | 2.41 (1.14-5.07) | 2.48 (1.23-4.98) | 2.49 (1.24-5.00) |
|                                          | Valproate     | 1.04 (0.25-4.34)  | 1.03 (0.25-4.31)  | 2.64 (2.02-3.44) | 2.64 (2.02-3.44) | 2.56 (1.97-3.32) | 2.56 (1.97-3.32) |
|                                          | Other         | -                 | -                 | 0.90 (0.45-1.81) | 0.90 (0.45-1.81) | 0.90 (0.45-1.81) | 0.90 (0.45-1.81) |
|                                          | Polytherapy   | 1.95 (0.70-5.43)  | 1.96 (0.70-5.47)  | 2.03 (1.47-2.80) | 2.03 (1.48-2.80) | 2.02 (1.49-2.75) | 2.03 (1.49-2.75) |
| Attention Deficit Hyperactivity Disorder | No ASM        | 1 (Reference)     | 1 (Reference)     | 1 (Reference)    | 1 (Reference)    | 1 (Reference)    | 1 (Reference)    |
|                                          | Carbamazepine | 1.51 (0.87-2.61)  | 1.50 (0.86-2.60)  | 1.05 (0.92-1.19) | 1.05 (0.92-1.19) | 1.07 (0.94-1.21) | 1.07 (0.94-1.21) |
|                                          | Gabapentin    | 1.77 (0.92-3.43)  | 1.85 (0.95-3.58)  | 1.13 (0.82-1.54) | 1.13 (0.83-1.55) | 1.22 (0.92-1.63) | 1.24 (0.93-1.64) |
|                                          | Lamotrigine   | 1.64 (0.93-2.89)  | 1.63 (0.92-2.87)  | 0.86 (0.75-0.98) | 0.86 (0.75-0.98) | 0.89 (0.78-1.01) | 0.89 (0.78-1.01) |
|                                          | Levetiracetam | 1.48 (0.28-7.83)  | 1.43 (0.27-7.47)  | 1.02 (0.60-1.72) | 1.01 (0.60-1.72) | 1.05 (0.64-1.74) | 1.05 (0.63-1.73) |
|                                          | Phenytoin     | 2.15 (0.30-15.39) | 2.13 (0.30-15.27) | 1.13 (0.77-1.67) | 1.13 (0.77-1.67) | 1.16 (0.79-1.70) | 1.16 (0.79-1.70) |
|                                          | Pregabalin    | 0.92 (0.29-2.93)  | 0.95 (0.30-3.02)  | 0.67 (0.54-0.82) | 0.67 (0.54-0.82) | 0.67 (0.55-0.83) | 0.68 (0.55-0.83) |
|                                          | Topiramate    | 0.71 (0.10-5.32)  | 0.72 (0.10-5.40)  | 0.80 (0.48-1.33) | 0.81 (0.49-1.34) | 0.80 (0.49-1.30) | 0.80 (0.49-1.31) |
|                                          | Valproate     | 1.48 (0.71-3.07)  | 1.46 (0.70-3.03)  | 1.18 (1.01-1.39) | 1.19 (1.01-1.39) | 1.20 (1.02-1.40) | 1.20 (1.02-1.40) |
|                                          | Other         | 1.05 (0.14-7.77)  | 1.01 (0.14-7.52)  | 0.94 (0.71-1.26) | 0.94 (0.71-1.26) | 0.95 (0.71-1.25) | 0.95 (0.71-1.25) |
|                                          | Polytherapy   | 1.13 (0.52-2.45)  | 1.12 (0.52-2.44)  | 1.12 (0.92-1.37) | 1.12 (0.92-1.37) | 1.12 (0.92-1.36) | 1.12 (0.92-1.36) |

\* Sensitivity excluding vomiting or antiemetics as a covariate

**Table S15** – Counts of antiseizure medications included in the polytherapy category

| <b>ASM included in polytherapy</b>                                                                                | <b>CPRD (UK),<br/>N (%) with polytherapy = 573 (100.00%)</b> | <b>DOHaD (Sweden),<br/>N (%) with polytherapy = 1167 (100.00%)</b> |
|-------------------------------------------------------------------------------------------------------------------|--------------------------------------------------------------|--------------------------------------------------------------------|
| Carbamazepine                                                                                                     | 204 (35.6%)                                                  | 353 (30.2%)                                                        |
| Gabapentin                                                                                                        | 65 (11.3%)                                                   | 92 (7.9%)                                                          |
| Lamotrigine                                                                                                       | 268 (46.8%)                                                  | 794 (68.0%)                                                        |
| Levetiracetam                                                                                                     | 225 (39.3%)                                                  | 449 (38.5%)                                                        |
| Phenytoin                                                                                                         | 27 (4.7%)                                                    | 36 (3.1%)                                                          |
| Pregabalin                                                                                                        | 49 (8.6%)                                                    | 187 (16.0%)                                                        |
| Topiramate                                                                                                        | 57 (10.0%)                                                   | 157 (13.5%)                                                        |
| Valproate                                                                                                         | 145 (25.3%)                                                  | 347 (29.7%)                                                        |
| Other                                                                                                             | 205 (35.8%)                                                  | 0 (0.0%)                                                           |
| Note that rows within a column are not mutually exclusive and so the sum of percentages will be greater than 100% |                                                              |                                                                    |

## Supplementary Figures

**Figure S1** – Flowchart of cohort derivation for CPRD (UK)

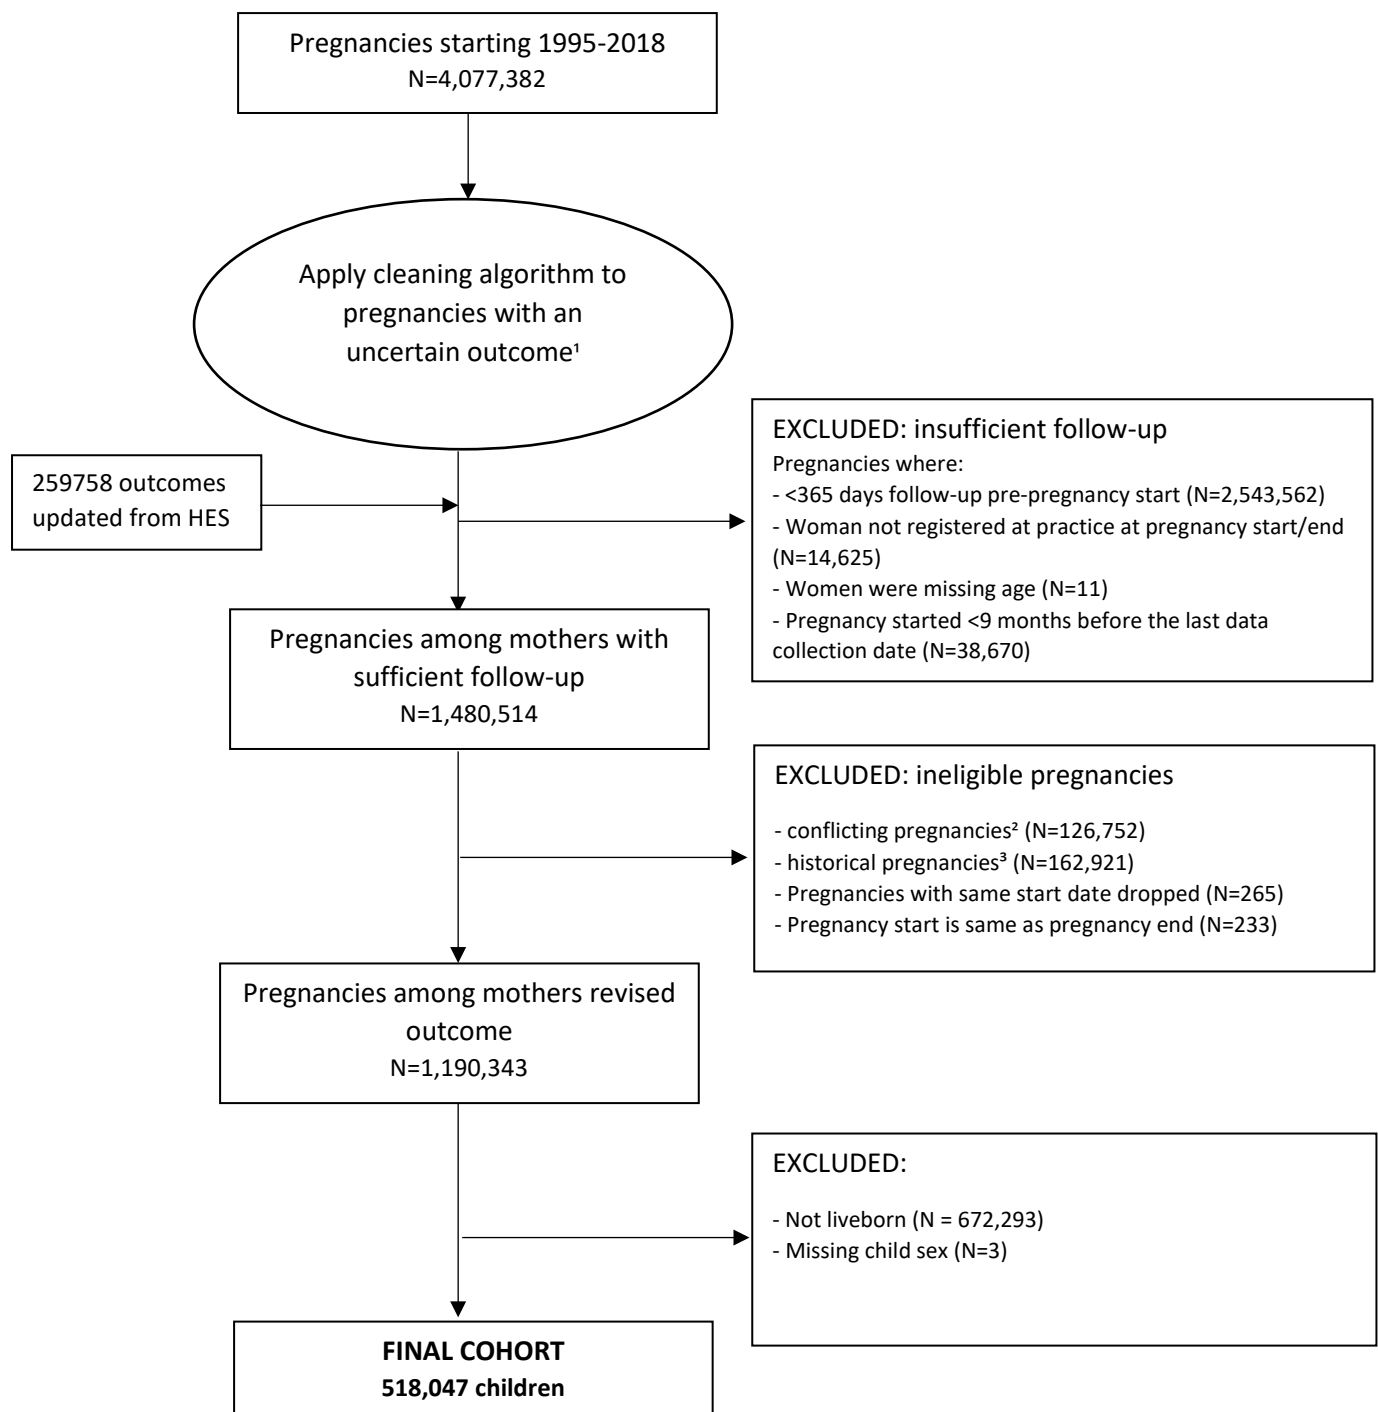

<sup>1</sup> See supplementary methods for more information on how we dealt with Uncertain pregnancies in the CPRD Pregnancy Register

<sup>2</sup>Conflicting pregnancies refer to pregnancies where dates overlap.

<sup>3</sup>Historical pregnancies refer to past pregnancies recorded at a later date



**Figure S2** – Flowchart of cohort derivation for DOHaD (Sweden)

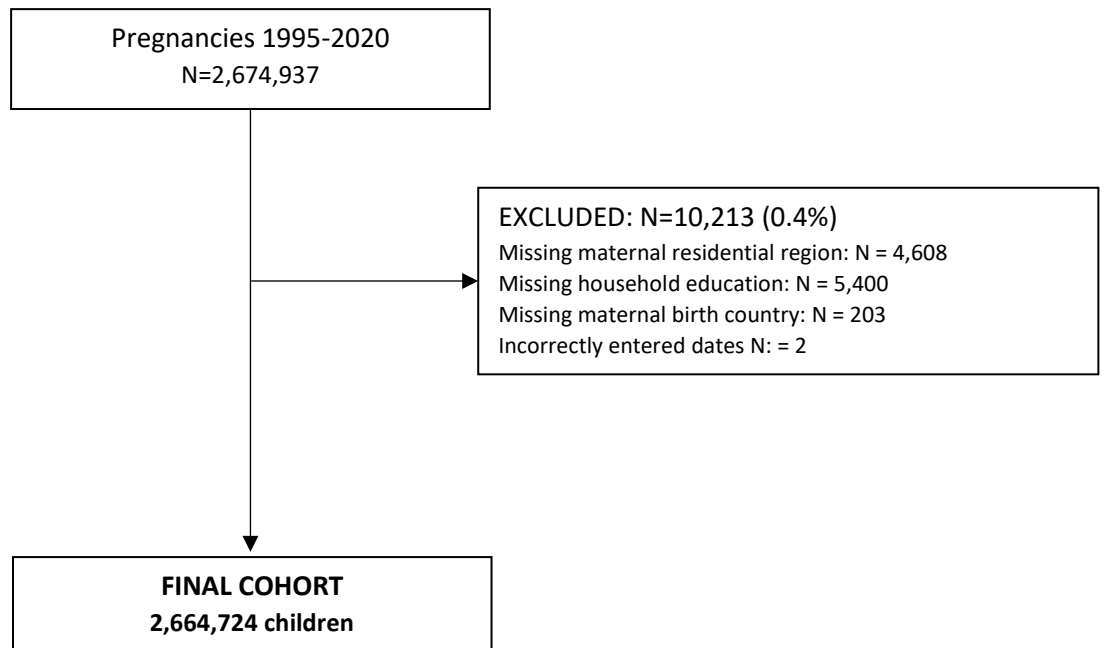

Figure S3 – Primary Analysis: Pooled risk difference results relative to no ASM at age 12

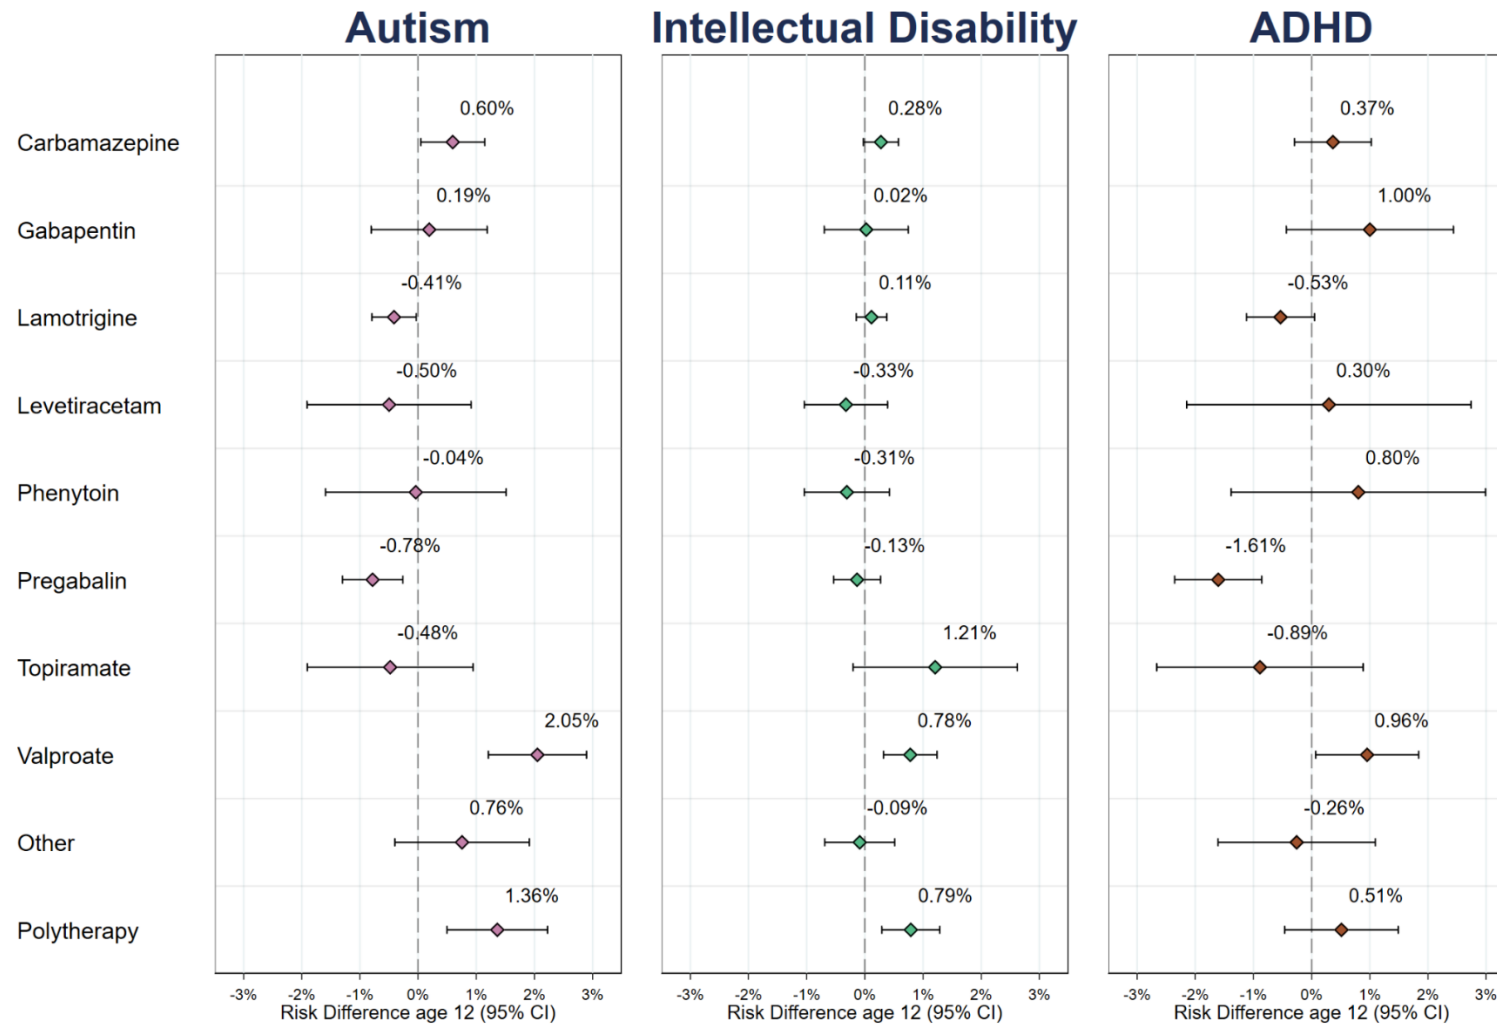

**Legend:** Data are presented as pooled absolute adjusted risk difference +/- 95% confidence limits, estimated using fixed-effects meta-analysis on the log-risk scale. All estimates are adjusted for maternal age, region, diagnosis of neurodevelopmental conditions before pregnancy, evidence of hazardous drinking and illicit drug use during pregnancy, gravidity, health care utilization, seizure events, use of antipsychotics and antidepressants in the year prior to pregnancy, vomiting or antiemetic prescriptions during pregnancy, and socioeconomic position. Sample size for figure: Carbamazepine = 3030, Gabapentin = 1428, Lamotrigine = 5974, Levetiracetam = 806, Phenytoin = 240, Pregabalin = 1715, Topiramate = 418, Valproate = 1601, Other ASM = 543, Polytherapy = 1740. Source data are provided as a Source Data file. Abbreviations: ADHD = Attention deficit hyperactivity disorder, ASM = Antiseizure medication.

Figure S4 – Primary Analysis: Country specific risk difference results for autism relative to no ASM

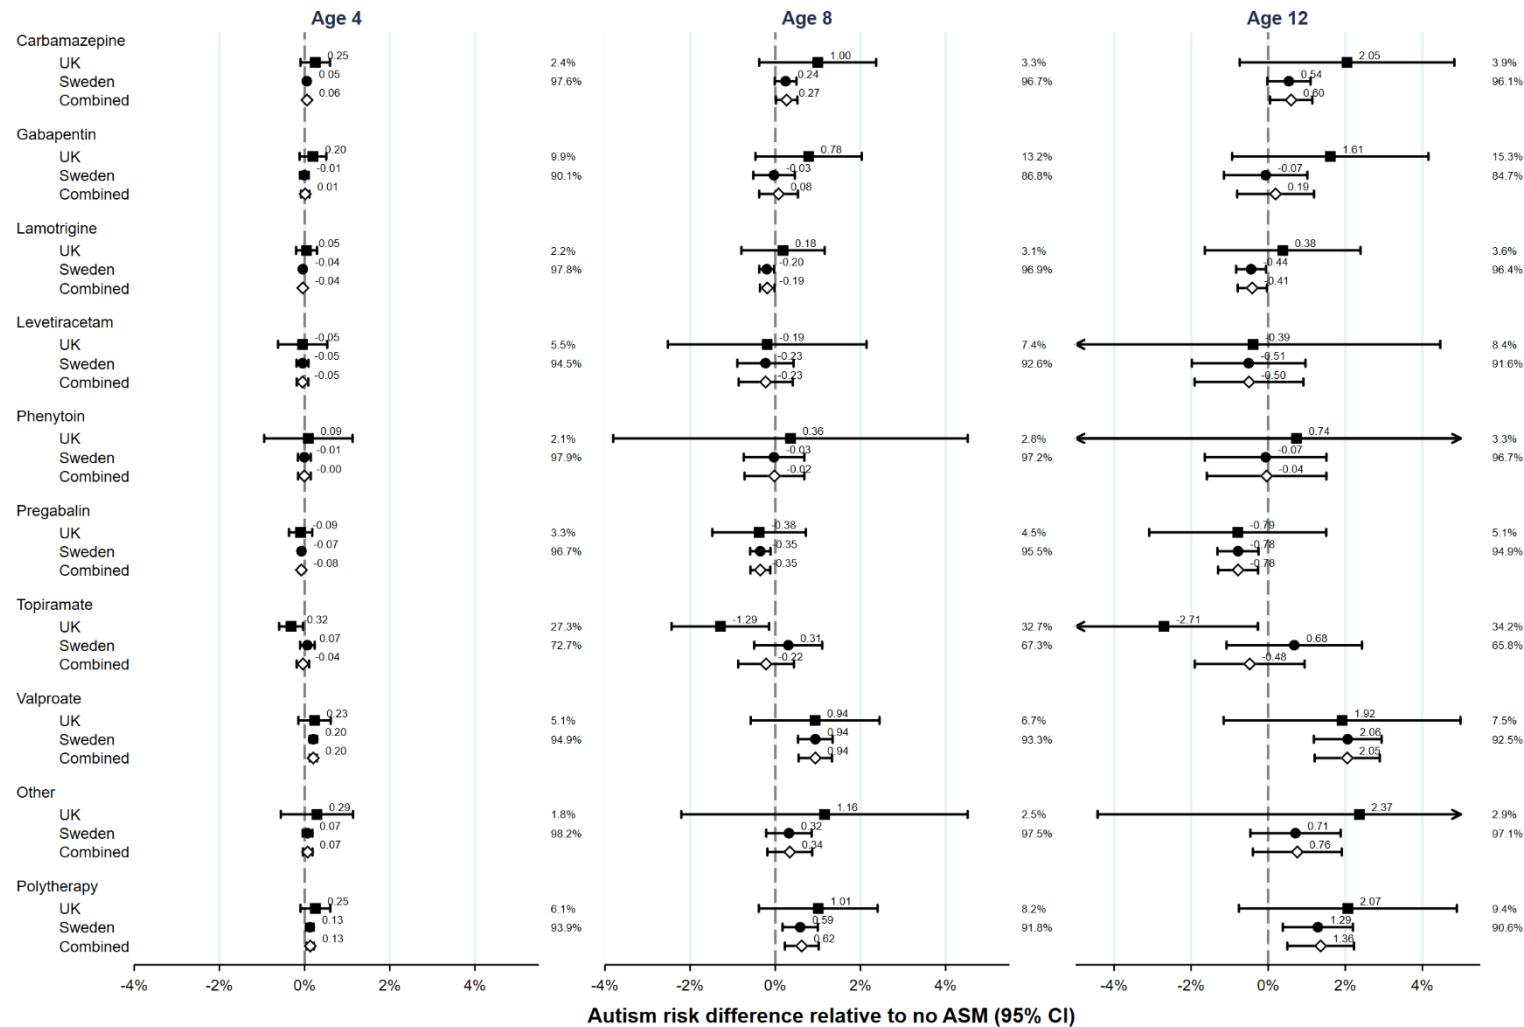

**Legend:** Data are presented as absolute adjusted risk difference +/- 95% confidence limits for autism, combined using fixed-effects meta-analysis on the log-risk scale. All estimates are adjusted for maternal age, region, diagnosis of neurodevelopmental conditions before pregnancy, evidence of hazardous drinking and illicit drug use during pregnancy, gravidity, health care utilization, seizure events, use of antipsychotics and antidepressants in the year prior to pregnancy, vomiting or antiemetic prescriptions during pregnancy, and socioeconomic position. Combined sample size: Carbamazepine = 3030, Gabapentin = 1428, Lamotrigine = 5974, Levetiracetam = 806, Phenytoin = 240, Pregabalin = 1715, Topiramate = 418, Valproate = 1601, Other ASM = 543, Polytherapy = 1740. Source data are provided as a Source Data file. Abbreviations: ASM = Antiseizure medication.

Figure S5 – Primary Analysis: Country specific risk difference results for intellectual disability relative to no ASM

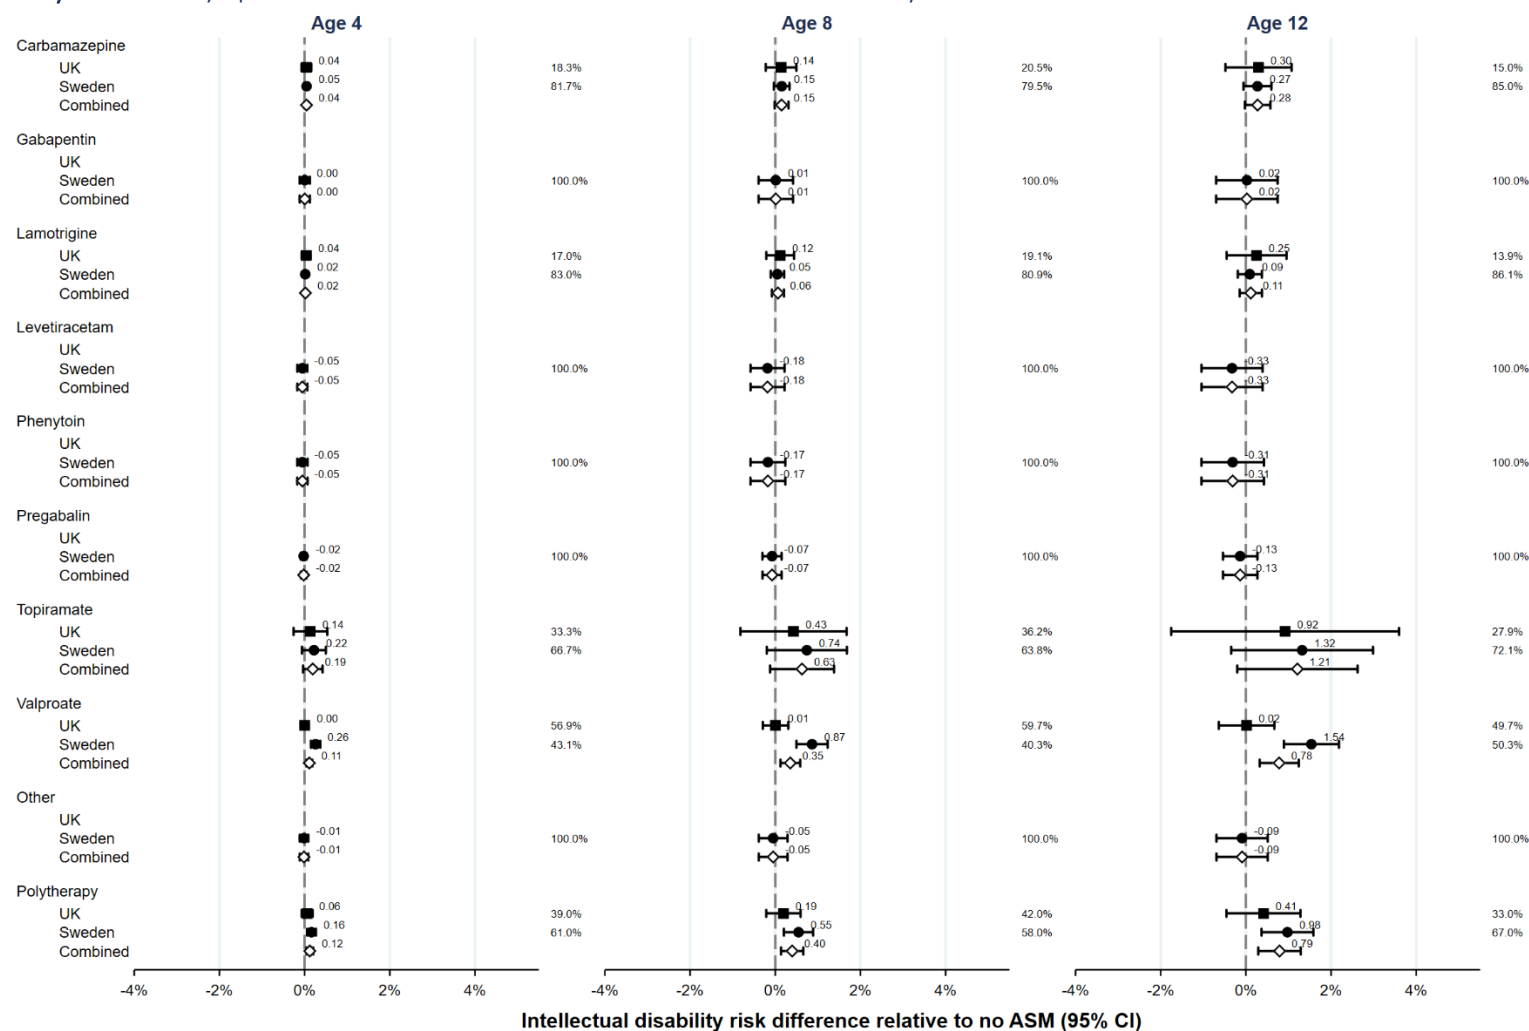

**Legend:** Data are presented as absolute adjusted risk difference +/- 95% confidence limits for intellectual disability, combined using fixed-effects meta-analysis on the log-risk scale. All estimates are adjusted for maternal age, region, diagnosis of neurodevelopmental conditions before pregnancy, evidence of hazardous drinking and illicit drug use during pregnancy, gravidity, health care utilization, seizure events, use of antipsychotics and antidepressants in the year prior to pregnancy, vomiting or antiemetic prescriptions during pregnancy, and socioeconomic position. Combined sample size: Carbamazepine = 3030, Gabapentin = 1428, Lamotrigine = 5974, Levetiracetam = 806, Phenytoin = 240, Pregabalin = 1715, Topiramate = 418, Valproate = 1601, Other ASM = 543, Polytherapy = 1740. Source data are provided as a Source Data file. Abbreviations: ASM = Antiseizure medication.

Figure S6 – Primary Analysis: Country specific risk difference results for ADHD relative to no ASM

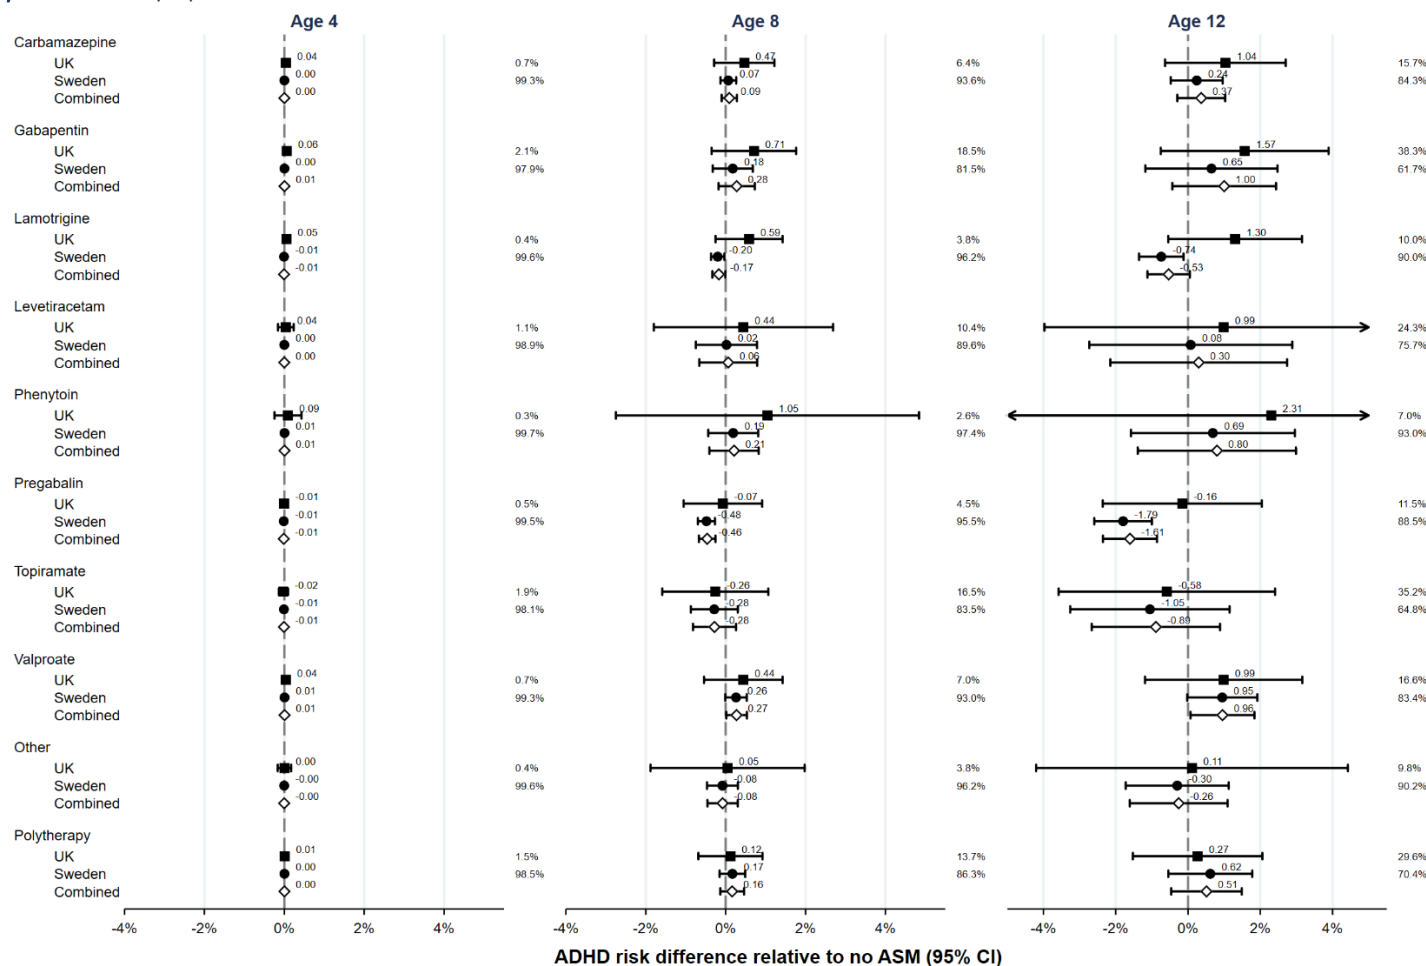

**Legend:** Data are presented as absolute adjusted risk difference +/- 95% confidence limits for ADHD, combined using fixed-effects meta-analysis on the log-risk scale. All estimates are adjusted for maternal age, region, diagnosis of neurodevelopmental conditions before pregnancy, evidence of hazardous drinking and illicit drug use during pregnancy, gravidity, health care utilization, seizure events, use of antipsychotics and antidepressants in the year prior to pregnancy, vomiting or antiemetic prescriptions during pregnancy, and socioeconomic position. Combined sample size: Carbamazepine = 3030, Gabapentin = 1428, Lamotrigine = 5974, Levetiracetam = 806, Phenytoin = 240, Pregabalin = 1715, Topiramate = 418, Valproate = 1601, Other ASM = 543, Polytherapy = 1740. Source data are provided as a Source Data file. Abbreviations: ADHD = Attention deficit hyperactivity disorder, ASM = Antiseizure medication.

Figure S7 – Primary Analysis: Country specific hazard ratio results

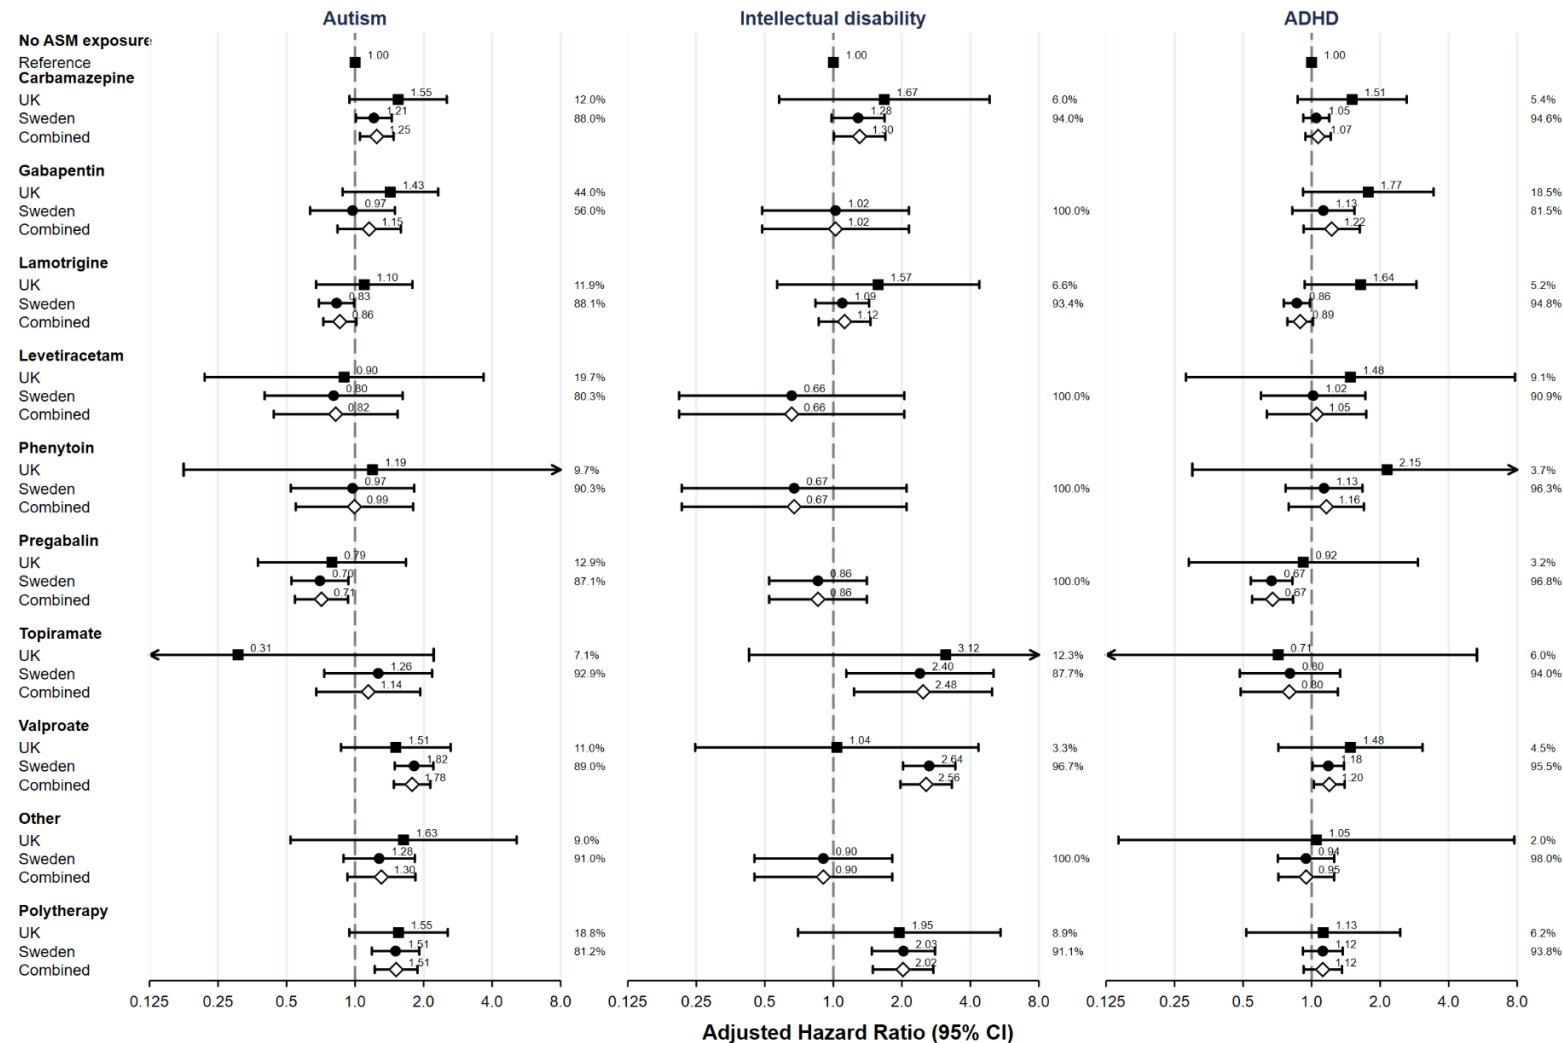

**Legend:** Data are presented as hazard ratios +/- 95% confidence limits for autism, intellectual disability, and ADHD, combined using fixed-effects meta-analysis on the log-hazard scale. All estimates are adjusted for maternal age, region, diagnosis of neurodevelopmental conditions before pregnancy, evidence of hazardous drinking and illicit drug use during pregnancy, gravidity, health care utilization, seizure events, use of antipsychotics and antidepressants in the year prior to pregnancy, vomiting or antiemetic prescriptions during pregnancy, and socioeconomic position. Combined sample size: Carbamazepine = 3030, Gabapentin = 1428, Lamotrigine = 5974, Levetiracetam = 806, Phenytoin = 240, Pregabalin = 1715, Topiramate = 418, Valproate = 1601, Other ASM = 543, Polytherapy = 1740. Source data are provided as a Source Data file.

Abbreviations: ADHD = Attention deficit hyperactivity disorder, ASM = Antiseizure medication.

Figure S8 – Discordant Sibling Analysis: Country specific within-family hazard ratio results

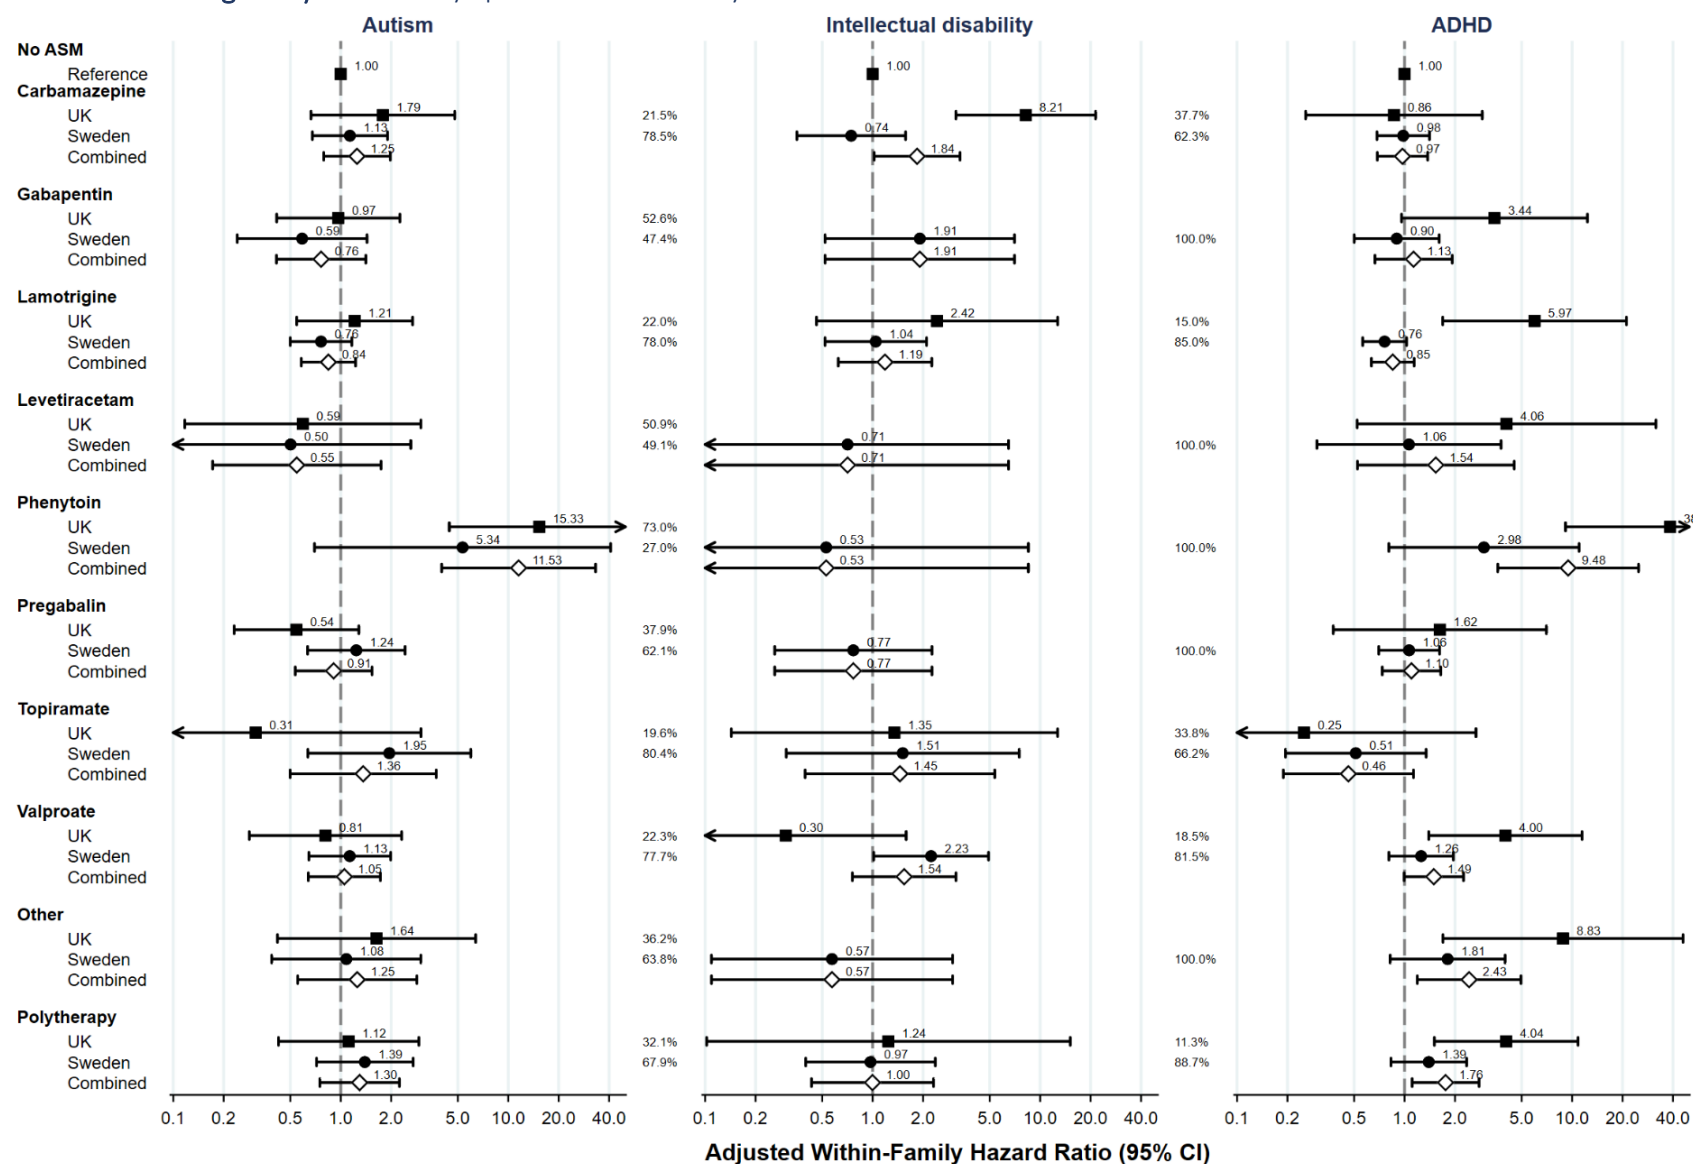

**Legend:** Data are presented as within-family hazard ratios +/- 95% confidence limits for autism, intellectual disability, and ADHD, combined using fixed-effects meta-analysis on the log-hazard scale. All estimates are adjusted for the same covariates as the primary analysis to the extent that they vary across siblings. Source data are provided as a Source Data file. Abbreviations: ADHD = Attention deficit hyperactivity disorder, ASM = Antiseizure medication.

Figure S9 – Active Comparator Analysis: Country specific hazard ratio results

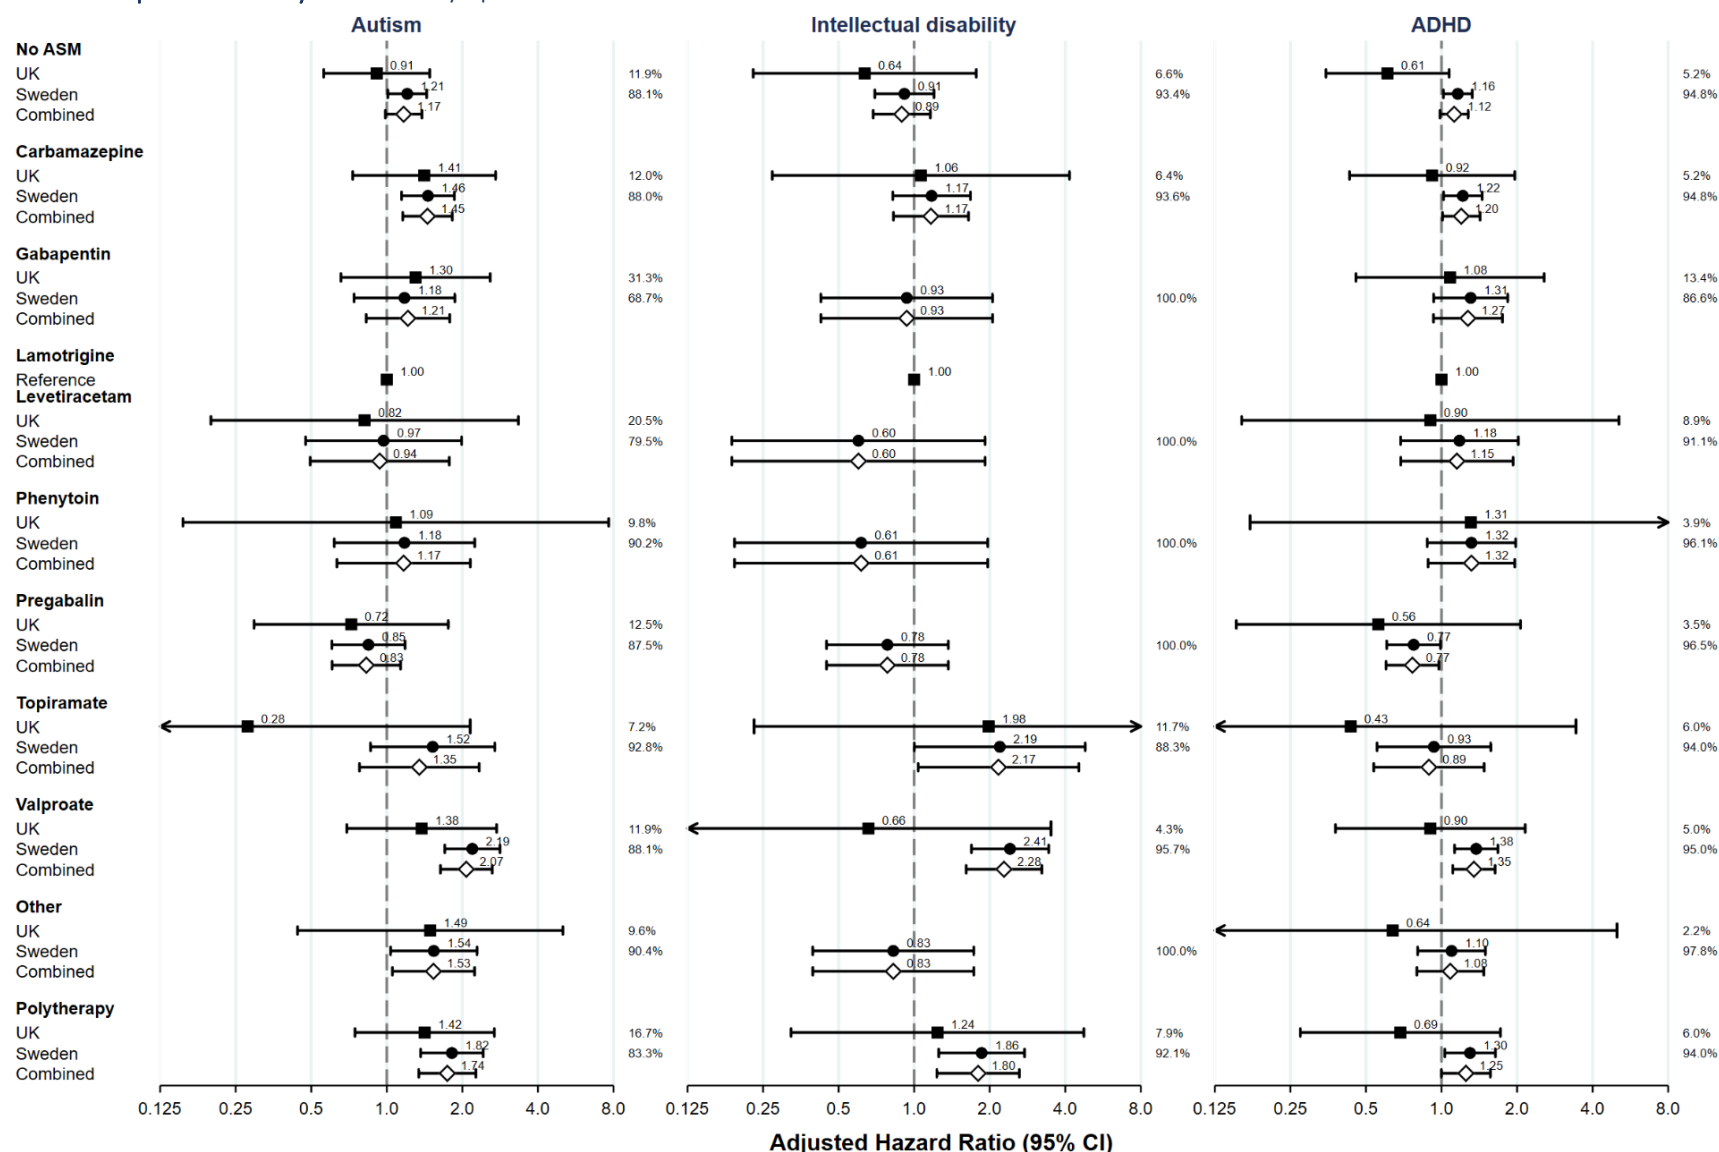

**Legend:** Data are presented as hazard ratios +/- 95% confidence limits for autism, intellectual disability, and ADHD, combined using fixed-effects meta-analysis on the log-hazard scale, using lamotrigine as the referent. All estimates are adjusted for the same covariates as the primary analysis. Source data are provided as a Source Data file. Abbreviations: ADHD = Attention deficit hyperactivity disorder, ASM = Antiseizure medication.



Figure S10 – Indication Stratified Analysis: Pooled adjusted marginal risk at age 12 results

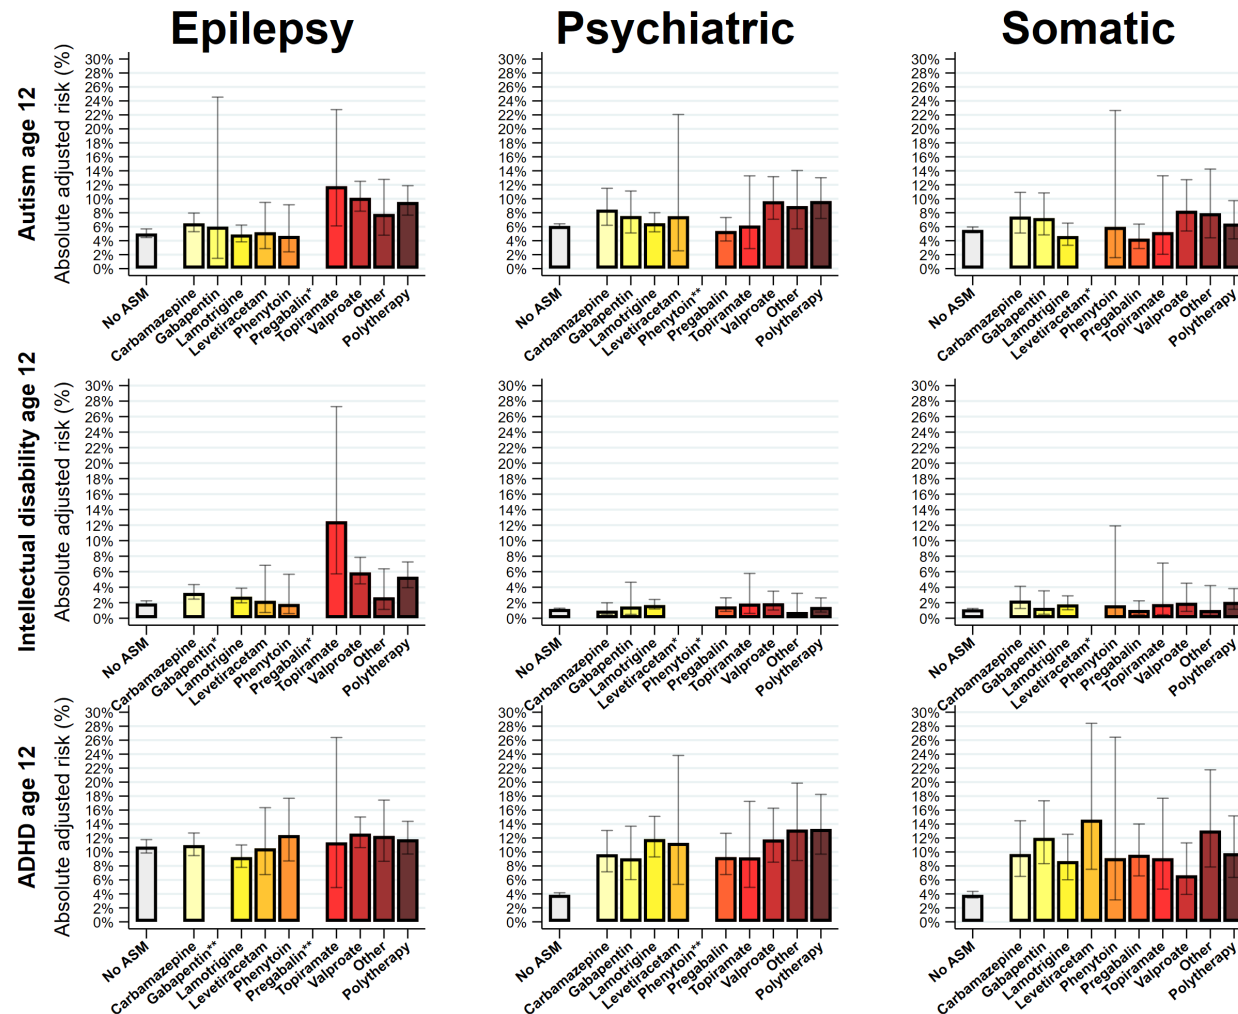

**Legend:** Data are presented as pooled absolute adjusted risk by age 12, +/- 95% confidence limits, for autism, intellectual disability, and ADHD, combined using fixed-effects meta-analysis on the log-hazard scale, among those with a psychiatric indication. All estimates are adjusted for the same covariates as the primary analysis. \* Unable to estimate due to 0 exposed case counts across both cohorts (See Table S10). \*\* Estimate not presented as it falls outside the plot region; note that this is due to a small number of exposed cases (See Table S11 and S12). Note that pooled estimates of the risk of ADHD among those not exposed to an ASM are heavily weighted towards the UK (CPRD) for psychiatric and somatic indications, where a lower risk was estimated than in Sweden (DOHaD), due to the calculation of lower standard errors for estimated risks closer to 0.. Source data are provided as a Source Data file. Abbreviations: ADHD = Attention deficit hyperactivity disorder, ASM = Antiseizure medication.

Figure S11 – Indication Stratified Analysis: Pooled hazard ratio results

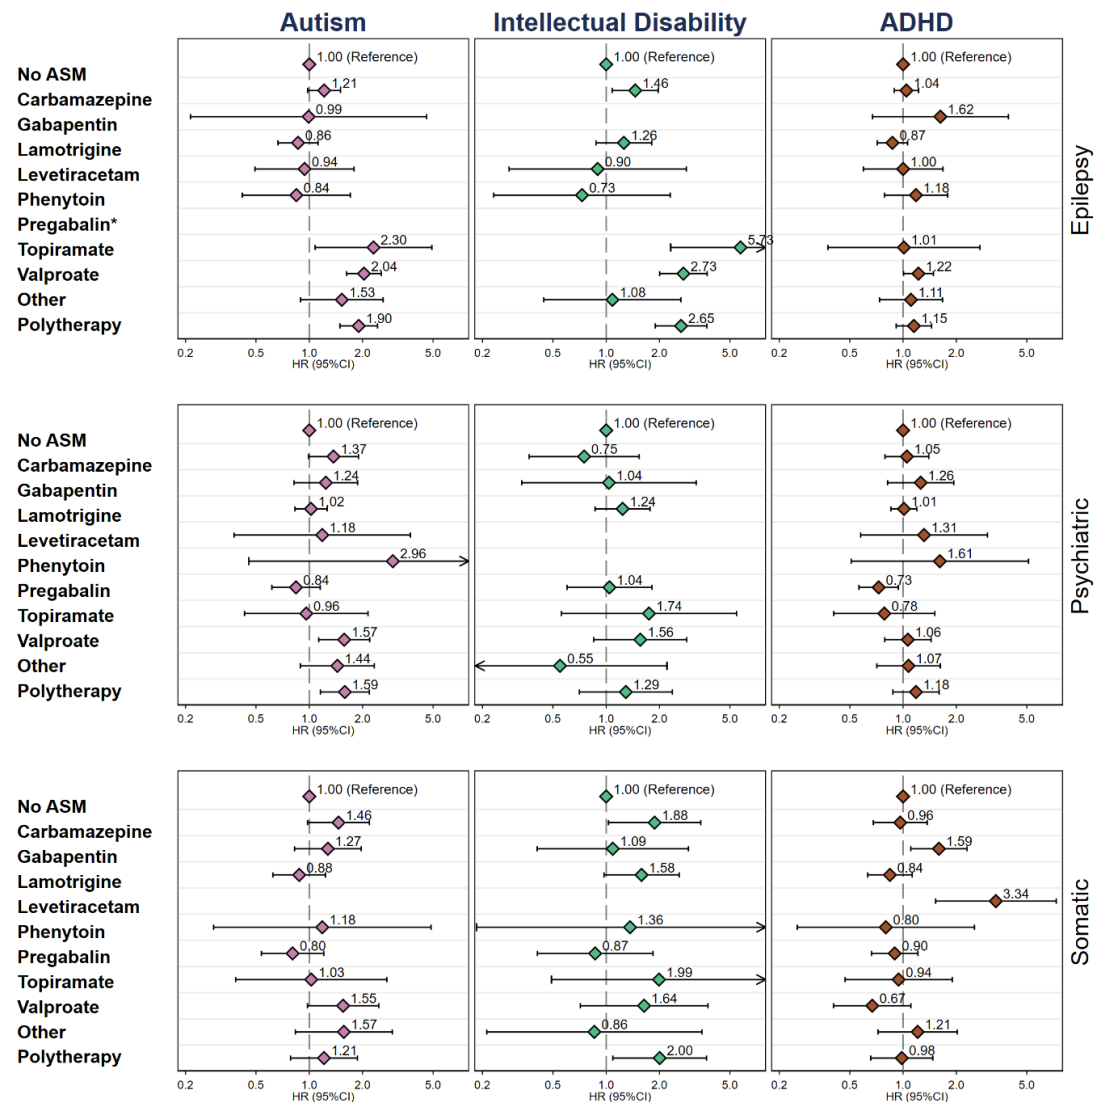

**Legend:** Data are presented as hazard ratios +/- 95% confidence limits for autism, intellectual disability, and ADHD, combined using fixed-effects meta-analysis on the log-hazard scale, among those with a psychiatric indication. All estimates are adjusted for the same covariates as the primary analysis. \*Pregabalin has been removed from the plot for epilepsy and ADHD as the estimates fall outside the plot region, note that this is due to a small number of exposed cases contributed by CPRD only (see Table 2 & S10). Source data are provided as a Source Data file. Abbreviations: ADHD = Attention deficit hyperactivity disorder, ASM = Antiseizure medication.

Figure S12 – Indication Stratified Analysis: Country specific hazard ratio results for epilepsy

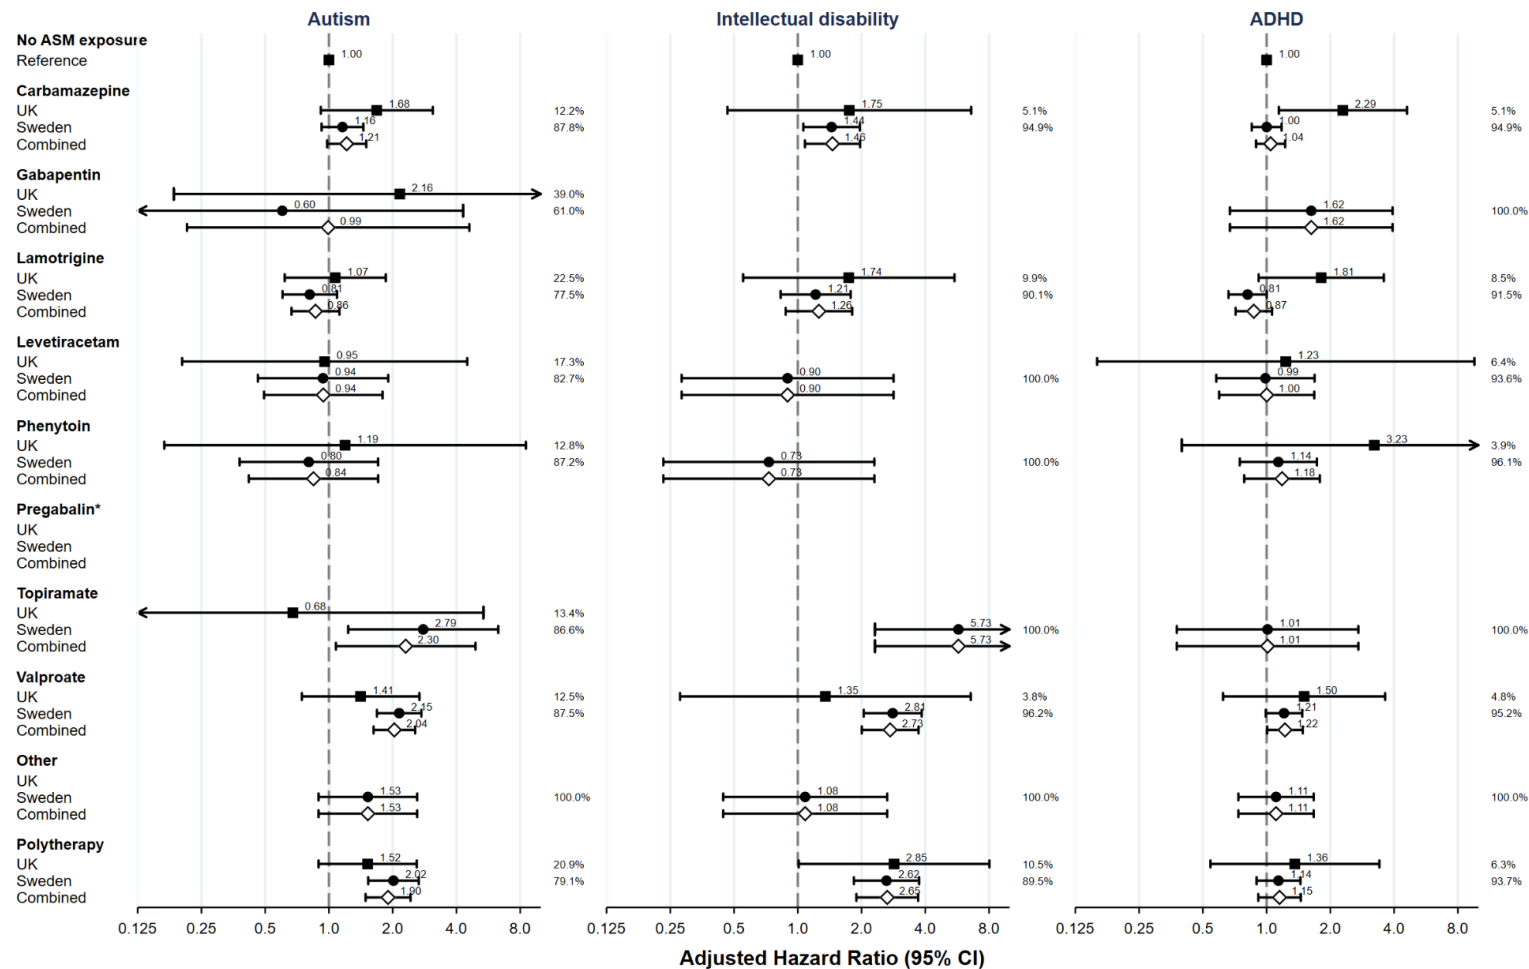

**Legend:** Data are presented as hazard ratios +/- 95% confidence limits for autism, intellectual disability, and ADHD, combined using fixed-effects meta-analysis on the log-hazard scale, among those with a psychiatric indication. All estimates are adjusted for the same covariates as the primary analysis.

\*Pregabalin has been removed from the plot for ADHD as the estimates fall outside the plot region, note that this is due to a small number of exposed cases contributed by CPRD only (see Table 2 & S10). Source data are provided as a Source Data file. Abbreviations: ADHD = Attention deficit hyperactivity disorder, ASM = Antiseizure medication.

Figure S13 – Indication Stratified Analysis: Country specific hazard ratio results for psychiatric indications

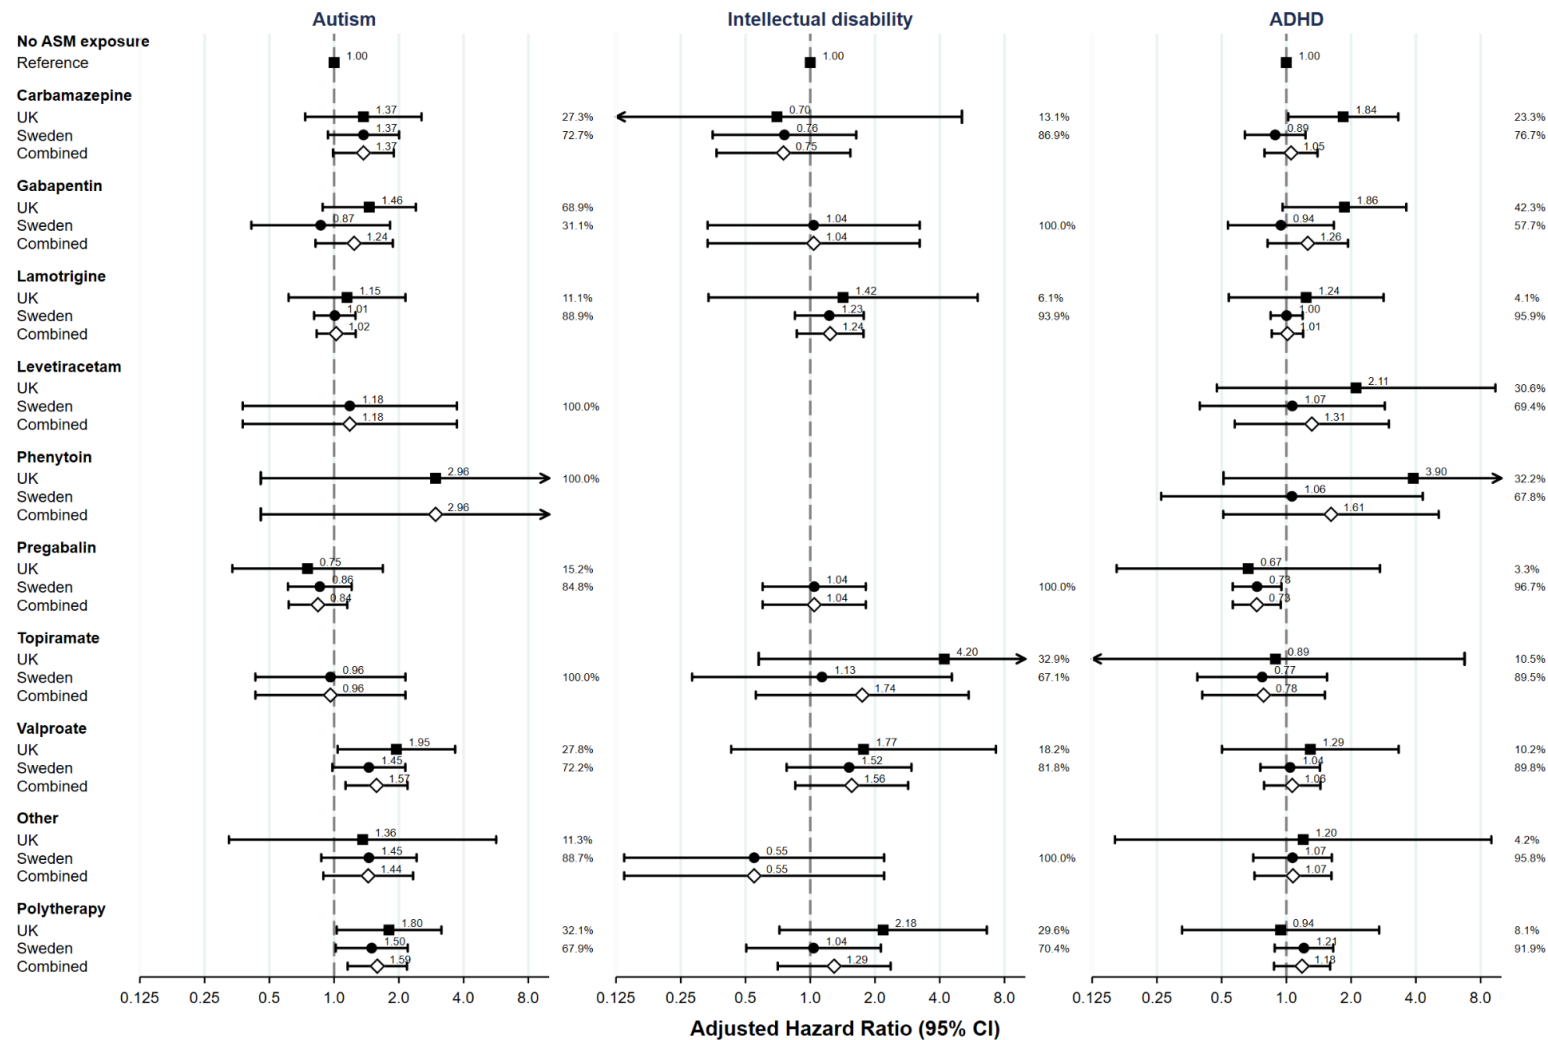

**Legend:** Data are presented as hazard ratios +/- 95% confidence limits for autism, intellectual disability, and ADHD, combined using fixed-effects meta-analysis on the log-hazard scale, among those with a psychiatric indication. All estimates are adjusted for the same covariates as the primary analysis. Source data are provided as a Source Data file. Abbreviations: ADHD = Attention deficit hyperactivity disorder, ASM = Antiseizure medication.

Figure S14 – Indication Stratified Analysis: Country specific hazard ratio results for somatic indications

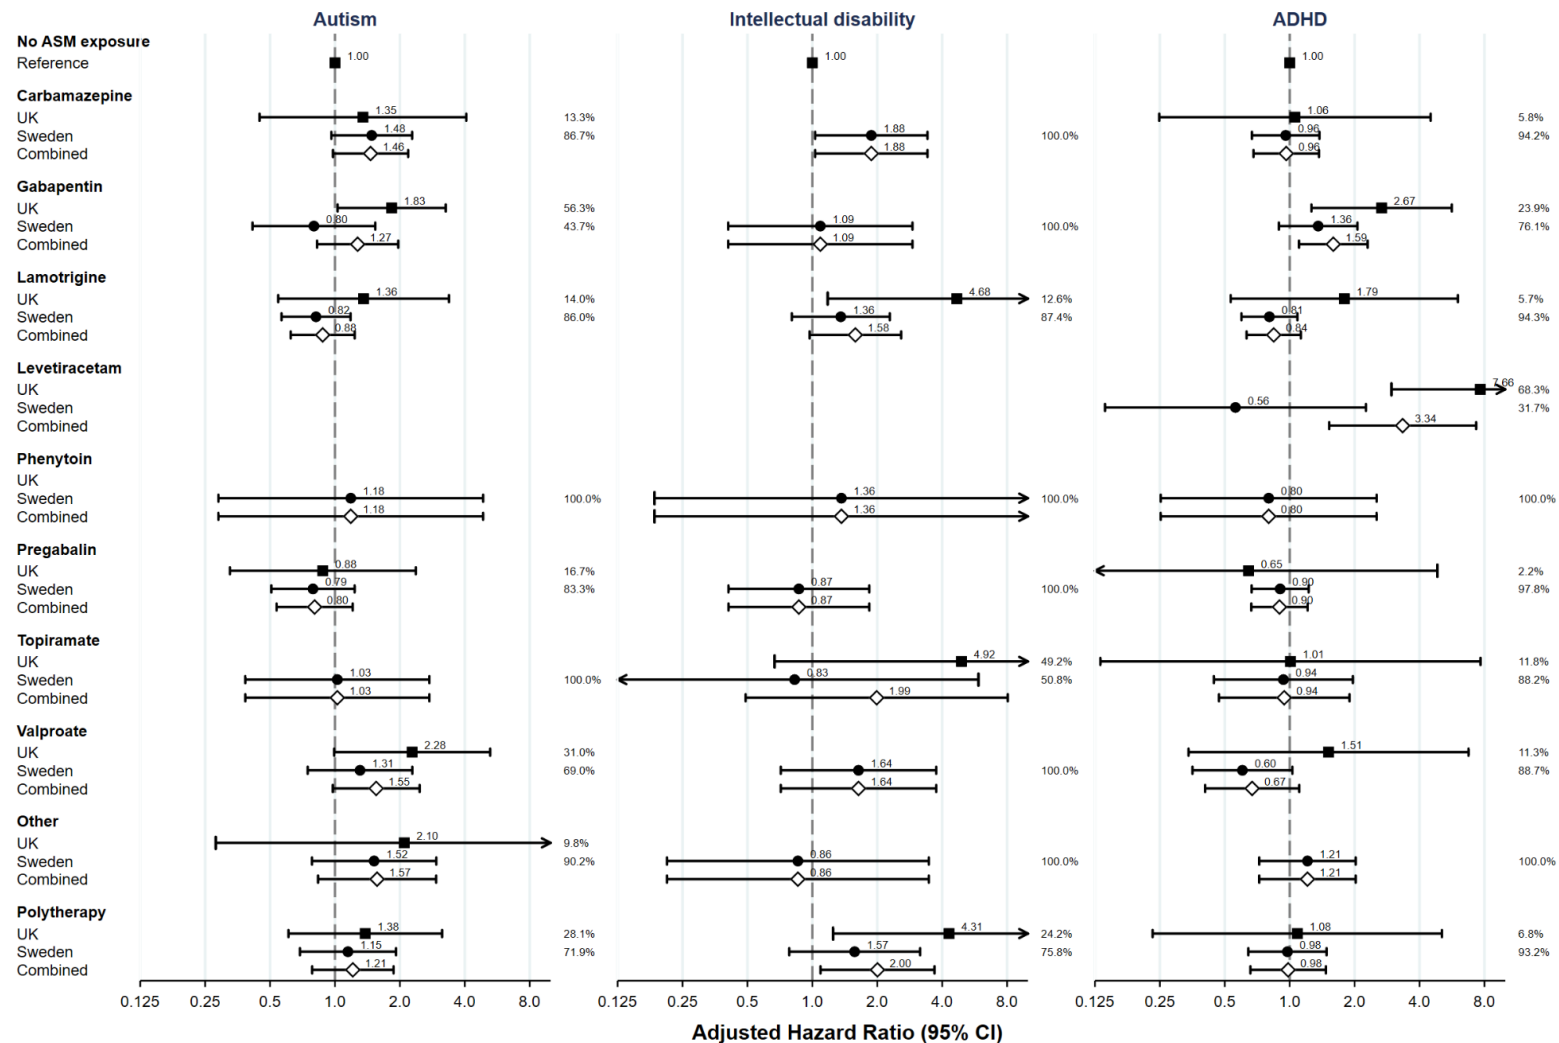

**Legend:** Data are presented as hazard ratios +/- 95% confidence limits for autism, intellectual disability, and ADHD, combined using fixed-effects meta-analysis on the log-hazard scale, among those with a somatic indication. All estimates are adjusted for the same covariates as the primary analysis. Source data are provided as a Source Data file. Abbreviations: ADHD = Attention deficit hyperactivity disorder, ASM = Antiseizure medication.

## References

1. Daugaard CA, Pedersen L, Sun Y, Dreier JW, Christensen J. Association of Prenatal Exposure to Valproate and Other Antiepileptic Drugs With Intellectual Disability and Delayed Childhood Milestones. *JAMA Netw Open*. Nov 2 2020;3(11):e2025570. doi:10.1001/jamanetworkopen.2020.25570
2. Bjørk M-H, Zoega H, Leinonen MK, et al. Association of Prenatal Exposure to Antiseizure Medication With Risk of Autism and Intellectual Disability. *JAMA Neurology*. 2022;79(7):672-681. doi:10.1001/jamaneurol.2022.1269 %J JAMA Neurology
3. Dreier JW, Bjork MH, Alvestad S, et al. Prenatal Exposure to Antiseizure Medication and Incidence of Childhood- and Adolescence-Onset Psychiatric Disorders. *JAMA Neurol*. Apr 17 2023;doi:10.1001/jamaneurol.2023.0674
4. Ren T, Lee PMY, Li F, Li J. Prenatal Carbamazepine Exposure and Academic Performance in Adolescents: A Population-Based Cohort Study. *Neurology*. Feb 14 2023;100(7):e728-e738. doi:10.1212/WNL.0000000000201529
5. Herrett E, Gallagher AM, Bhaskaran K, et al. Data Resource Profile: Clinical Practice Research Datalink (CPRD). *Int J Epidemiol*. Jun 2015;44(3):827-36. doi:10.1093/ije/dyv098
6. Chisholm J. The Read clinical classification. *BMJ*. Apr 28 1990;300(6732):1092. doi:10.1136/bmj.300.6732.1092
7. Clinical Practice Research Datalink. Data from: CPRD GOLD August 2021. 2021;2021.08.001. doi:<https://doi.org/10.48329/dfcr-ap05>
8. Minassian C, Williams R, Meeraus WH, Smeeth L, Campbell OMR, Thomas SL. Methods to generate and validate a Pregnancy Register in the UK Clinical Practice Research Datalink primary care database. *Pharmacoepidemiol Drug Saf*. Jul 2019;28(7):923-933. doi:10.1002/pds.4811
9. CPRD Mother Baby Link Documentation (Version 1.2) (2017).
10. Clinical Practice Research Datalink. Data from: CPRD GOLD HES APC March 2021. 2021;2021.03.001. doi:<https://doi.org/10.48329/aven-n539>
11. Clinical Practice Research Datalink. Data from: CPRD GOLD HES OP August 2021. 2021;2021.08.001. doi:<https://doi.org/10.48329/cp5e-7790>
12. Clinical Practice Research Datalink. Data from: CPRD GOLD HES A&E August 2021. 2021;2021.08.001. doi:<https://doi.org/10.48329/XTWG-GP32>
13. Clinical Practice Research Datalink. Data from: CPRD GOLD Small Area data (patient) March 2021. 2021;2021.03.001. doi:<https://doi.org/10.48329/1qnt-r031>
14. Clinical Practice Research Datalink. Data from: CPRD GOLD Small Area data (practice) March 2021. 2021;2021.03.001. doi:<https://doi.org/10.48329/g915-nk16>
15. Clinical Practice Research Datalink. Data from: CPRD ONS deaths March 2021. 2021;2021.03.001. doi:<https://doi.org/10.48329/4c3r-av86>
16. Ahlqvist VH, Sjöqvist H, Dalman C, et al. Acetaminophen Use During Pregnancy and Children's Risk of Autism, ADHD, and Intellectual Disability. *JAMA*. 2024;331(14):1205-1214. doi:10.1001/jama.2024.3172 %J JAMA
17. Ludvigsson JF, Otterblad-Olausson P, Pettersson BU, Ekblom A. The Swedish personal identity number: possibilities and pitfalls in healthcare and medical research. *Eur J Epidemiol*. 2009;24(11):659-67. doi:10.1007/s10654-009-9350-y
18. Cnattingius S, Kallen K, Sandstrom A, et al. The Swedish medical birth register during five decades: documentation of the content and quality of the register. *Eur J Epidemiol*. Jan 2023;38(1):109-120. doi:10.1007/s10654-022-00947-5
19. Wettermark B, Hammar N, Foröd CM, et al. The new Swedish Prescribed Drug Register--opportunities for pharmacoepidemiological research and experience from the first six months. *Pharmacoepidemiol Drug Saf*. Jul 2007;16(7):726-35. doi:10.1002/pds.1294
20. Ludvigsson JF, Andersson E, Ekblom A, et al. External review and validation of the Swedish national inpatient register. *BMC public health*. Jun 9 2011;11:450. doi:10.1186/1471-2458-11-450

21. Statistics Sweden. Longitudinal integration database for health insurance and labour market studies (LISA by Swedish acronym). English; 2012.
22. Campbell J, Bhaskaran K, Thomas S, Williams R, McDonald HI, Minassian C. Investigating the optimal handling of uncertain pregnancy episodes in the CPRD GOLD Pregnancy Register: a methodological study using UK primary care data. *BMJ Open*. Feb 22 2022;12(2):e055773. doi:10.1136/bmjopen-2021-055773
